# Supplementary material for: Climatology of Snow Depth and Water Equivalent measurements in the Italian Alps (1967–2020)
Source: Copernicus journal article supplement (doi:10.5194/hess-2023-223), 2023-09-26
Supplement: Supplementary file 1 [file hess-2023-223-supplement.pdf]

# Supplementary material of the paper “Climatology of Snow Depth and Water Equivalent measurements in the Italian Alps (1967 - 2020)”

Roberto Ranzi<sup>1</sup>, Paolo Colosio<sup>1</sup>, Giorgio Galeati<sup>2</sup>

5 <sup>1</sup> Department of Civil, Environmental, Architectural Engineering, and Mathematics, University of Brescia, Brescia 25121, Italy

<sup>2</sup> Italian Hydrological Society, Bologna 40127, Italy

*Correspondence to:* Paolo Colosio (paolo.colosio1@unibs.it)

10

## Description

In this document are reported the tables containing the number of measurements available for each specific macro-basin, measurement date and elevation class for every year of observation. In the first table we report a summary of all the measurements analysed for each macro-basin, elevation class and measurement date. The total number of snow depth  
15 measurements is 44'411 and the total number of bulk snow density measurements is 14'479.

|                    |           | N° HS measurements | N° $\rho_s$ measurements |
|--------------------|-----------|--------------------|--------------------------|
| Piave-Brenta       | 1000-1500 | 4307               | 1796                     |
|                    | 1500-2000 | 3525               | 1565                     |
|                    | 2000-2500 | 1302               | 842                      |
|                    | 2500-3000 | 183                | 90                       |
| Adige              | 1000-1500 | 256                | 97                       |
|                    | 1500-2000 | 1869               | 471                      |
|                    | 2000-2500 | 1112               | 412                      |
|                    | 2500-3000 | 1297               | 901                      |
| Oglio-Chiese-Sarca | 1000-1500 | 3036               | 851                      |
|                    | 1500-2000 | 4144               | 860                      |
|                    | 2000-2500 | 5007               | 1710                     |
|                    | 2500-3000 | 2041               | 1109                     |
| Serio-Brembo       | 1000-1500 | 200                | 0                        |
|                    | 1500-2000 | 4287               | 728                      |
|                    | 2000-2500 | 1361               | 677                      |
|                    | 2500-3000 | 8                  | 7                        |
| Adda               | 1000-1500 | 0                  | 0                        |
|                    | 1500-2000 | 1633               | 591                      |
|                    | 2000-2500 | 1953               | 828                      |
|                    | 2500-3000 | 54                 | 0                        |
| Toce               | 1000-1500 | 442                | 0                        |
|                    | 1500-2000 | 2250               | 236                      |
|                    | 2000-2500 | 4025               | 708                      |
|                    | 2500-3000 | 119                | 0                        |

| Piave – Brenta       |        |        |        |        |        |        |
|----------------------|--------|--------|--------|--------|--------|--------|
| HS – 1000-1500 m asl |        |        |        |        |        |        |
| Date                 | 01-feb | 01-mar | 01-apr | 15-apr | 01-mag | 01-giu |
| 1967                 | 13     | 12     | 11     | 13     | 13     | 14     |
| 1968                 | 14     | 14     | 14     | 14     | 14     | 14     |
| 1969                 | 14     | 14     | 14     | 14     | 14     | 14     |
| 1970                 | 14     | 14     | 14     | 13     | 14     | 14     |
| 1971                 | 14     | 14     | 14     | 14     | 14     | 14     |
| 1972                 | 14     | 14     | 14     | 14     | 14     | 14     |
| 1973                 | 14     | 14     | 14     | 14     | 14     | 14     |
| 1974                 | 13     | 14     | 14     | 13     | 14     | 14     |
| 1975                 | 14     | 14     | 14     | 14     | 14     | 14     |
| 1976                 | 14     | 14     | 14     | 14     | 14     | 14     |
| 1977                 | 14     | 14     | 14     | 14     | 14     | 14     |
| 1978                 | 14     | 14     | 14     | 14     | 11     | 14     |
| 1979                 | 14     | 14     | 14     | 13     | 14     | 14     |
| 1980                 | 14     | 14     | 14     | 14     | 14     | 14     |
| 1981                 | 14     | 14     | 14     | 14     | 14     | 14     |
| 1982                 | 14     | 14     | 14     | 14     | 14     | 14     |
| 1983                 | 14     | 14     | 14     | 14     | 14     | 14     |
| 1984                 | 14     | 14     | 14     | 14     | 14     | 14     |
| 1985                 | 14     | 14     | 14     | 14     | 14     | 14     |
| 1986                 | 14     | 14     | 14     | 14     | 14     | 14     |
| 1987                 | 14     | 14     | 14     | 14     | 14     | 5      |
| 1988                 | 14     | 14     | 14     | 14     | 13     | 14     |
| 1989                 | 14     | 14     | 14     | 14     | 14     | 14     |
| 1990                 | 0      | 0      | 0      | 0      | 0      | 0      |
| 1991                 | 0      | 0      | 0      | 0      | 0      | 0      |
| 1992                 | 0      | 0      | 0      | 0      | 0      | 14     |
| 1993                 | 2      | 5      | 2      | 5      | 5      | 4      |
| 1994                 | 13     | 14     | 14     | 14     | 14     | 14     |
| 1995                 | 14     | 14     | 14     | 13     | 14     | 14     |

|      |    |    |    |    |    |    |
|------|----|----|----|----|----|----|
| 1996 | 14 | 14 | 14 | 14 | 14 | 14 |
| 1997 | 14 | 14 | 14 | 14 | 14 | 2  |
| 1998 | 14 | 14 | 13 | 14 | 14 | 14 |
| 1999 | 14 | 14 | 14 | 13 | 14 | 14 |
| 2000 | 10 | 14 | 14 | 12 | 14 | 13 |
| 2001 | 6  | 10 | 10 | 10 | 10 | 10 |
| 2002 | 6  | 10 | 10 | 5  | 10 | 10 |
| 2003 | 10 | 10 | 10 | 9  | 10 | 10 |
| 2004 | 9  | 10 | 10 | 9  | 10 | 5  |
| 2005 | 15 | 15 | 15 | 13 | 15 | 15 |
| 2006 | 12 | 12 | 12 | 12 | 12 | 12 |
| 2007 | 12 | 12 | 10 | 12 | 12 | 12 |
| 2008 | 12 | 12 | 13 | 13 | 13 | 13 |
| 2009 | 18 | 18 | 18 | 18 | 18 | 18 |
| 2010 | 17 | 13 | 18 | 18 | 18 | 18 |
| 2011 | 18 | 18 | 18 | 18 | 18 | 18 |
| 2012 | 18 | 18 | 18 | 18 | 18 | 15 |
| 2013 | 18 | 18 | 17 | 17 | 18 | 18 |
| 2014 | 12 | 17 | 18 | 18 | 18 | 18 |
| 2015 | 18 | 18 | 18 | 18 | 18 | 18 |
| 2016 | 18 | 18 | 18 | 18 | 18 | 18 |
| 2017 | 18 | 18 | 18 | 18 | 15 | 18 |
| 2018 | 18 | 18 | 18 | 18 | 18 | 18 |
| 2019 | 18 | 18 | 18 | 18 | 17 | 18 |
| 2020 | 18 | 18 | 17 | 18 | 18 | 18 |

| Piave – Brenta       |        |        |        |        |        |        |
|----------------------|--------|--------|--------|--------|--------|--------|
| HS – 1500-2000 m asl |        |        |        |        |        |        |
| Date                 | 01-feb | 01-mar | 01-apr | 15-apr | 01-mag | 01-giu |
| 1967                 | 6      | 6      | 7      | 9      | 9      | 9      |
| 1968                 | 9      | 9      | 9      | 9      | 9      | 9      |
| 1969                 | 9      | 9      | 9      | 9      | 9      | 9      |
| 1970                 | 9      | 9      | 9      | 9      | 9      | 9      |
| 1971                 | 9      | 9      | 9      | 9      | 9      | 9      |
| 1972                 | 9      | 9      | 9      | 9      | 9      | 9      |
| 1973                 | 9      | 9      | 9      | 9      | 9      | 9      |
| 1974                 | 9      | 9      | 9      | 9      | 9      | 9      |
| 1975                 | 9      | 9      | 8      | 9      | 9      | 9      |
| 1976                 | 9      | 9      | 9      | 9      | 9      | 9      |
| 1977                 | 7      | 9      | 8      | 9      | 9      | 9      |
| 1978                 | 9      | 8      | 9      | 9      | 8      | 9      |
| 1979                 | 9      | 9      | 9      | 9      | 9      | 9      |
| 1980                 | 9      | 9      | 9      | 9      | 9      | 9      |
| 1981                 | 9      | 9      | 9      | 9      | 9      | 9      |
| 1982                 | 9      | 9      | 9      | 9      | 9      | 9      |
| 1983                 | 9      | 9      | 9      | 9      | 9      | 9      |
| 1984                 | 10     | 9      | 10     | 10     | 10     | 10     |
| 1985                 | 10     | 10     | 10     | 10     | 10     | 10     |
| 1986                 | 10     | 10     | 10     | 10     | 10     | 10     |
| 1987                 | 10     | 10     | 10     | 10     | 10     | 7      |
| 1988                 | 10     | 10     | 10     | 10     | 10     | 10     |
| 1989                 | 10     | 10     | 10     | 10     | 10     | 10     |
| 1990                 | 1      | 1      | 1      | 1      | 1      | 0      |
| 1991                 | 1      | 1      | 1      | 1      | 1      | 0      |
| 1992                 | 1      | 1      | 1      | 1      | 1      | 10     |
| 1993                 | 4      | 5      | 3      | 5      | 5      | 3      |
| 1994                 | 6      | 8      | 8      | 8      | 8      | 8      |
| 1995                 | 8      | 8      | 8      | 6      | 8      | 8      |

|      |    |    |    |    |    |    |
|------|----|----|----|----|----|----|
| 1996 | 8  | 8  | 7  | 8  | 9  | 8  |
| 1997 | 8  | 6  | 6  | 6  | 6  | 2  |
| 1998 | 6  | 6  | 5  | 5  | 6  | 6  |
| 1999 | 6  | 6  | 6  | 5  | 6  | 6  |
| 2000 | 4  | 5  | 5  | 5  | 5  | 5  |
| 2001 | 4  | 6  | 6  | 6  | 6  | 6  |
| 2002 | 4  | 6  | 6  | 3  | 6  | 5  |
| 2003 | 5  | 6  | 6  | 6  | 6  | 6  |
| 2004 | 6  | 6  | 6  | 6  | 5  | 2  |
| 2005 | 15 | 15 | 15 | 15 | 15 | 15 |
| 2006 | 17 | 17 | 17 | 17 | 17 | 17 |
| 2007 | 17 | 17 | 17 | 17 | 17 | 17 |
| 2008 | 17 | 17 | 17 | 16 | 17 | 17 |
| 2009 | 20 | 20 | 19 | 19 | 19 | 21 |
| 2010 | 20 | 16 | 20 | 20 | 20 | 20 |
| 2011 | 20 | 20 | 20 | 20 | 20 | 20 |
| 2012 | 20 | 20 | 20 | 20 | 21 | 20 |
| 2013 | 19 | 19 | 19 | 19 | 19 | 20 |
| 2014 | 14 | 19 | 19 | 19 | 19 | 19 |
| 2015 | 20 | 20 | 20 | 20 | 20 | 20 |
| 2016 | 20 | 20 | 20 | 20 | 20 | 20 |
| 2017 | 20 | 20 | 20 | 20 | 20 | 20 |
| 2018 | 20 | 20 | 20 | 20 | 20 | 21 |
| 2019 | 20 | 20 | 20 | 20 | 20 | 20 |
| 2020 | 19 | 19 | 17 | 19 | 21 | 23 |

| Piave – Brenta       |        |        |        |        |        |        |
|----------------------|--------|--------|--------|--------|--------|--------|
| HS – 2000-2500 m asl |        |        |        |        |        |        |
| Date                 | 01-feb | 01-mar | 01-apr | 15-apr | 01-mag | 01-giu |
| 1967                 | 2      | 1      | 3      | 2      | 3      | 3      |
| 1968                 | 3      | 2      | 3      | 2      | 3      | 2      |
| 1969                 | 3      | 2      | 3      | 3      | 3      | 2      |
| 1970                 | 3      | 2      | 3      | 2      | 3      | 2      |
| 1971                 | 3      | 3      | 3      | 2      | 3      | 2      |
| 1972                 | 3      | 2      | 3      | 2      | 3      | 3      |
| 1973                 | 3      | 2      | 3      | 2      | 3      | 2      |
| 1974                 | 3      | 2      | 3      | 3      | 3      | 2      |
| 1975                 | 3      | 2      | 3      | 2      | 3      | 2      |
| 1976                 | 3      | 3      | 3      | 2      | 3      | 2      |
| 1977                 | 3      | 2      | 3      | 2      | 3      | 3      |
| 1978                 | 3      | 2      | 3      | 2      | 3      | 2      |
| 1979                 | 3      | 2      | 3      | 3      | 3      | 2      |
| 1980                 | 3      | 2      | 3      | 2      | 3      | 2      |
| 1981                 | 3      | 3      | 3      | 2      | 3      | 2      |
| 1982                 | 3      | 2      | 3      | 2      | 3      | 3      |
| 1983                 | 3      | 2      | 3      | 2      | 3      | 2      |
| 1984                 | 4      | 3      | 4      | 4      | 4      | 3      |
| 1985                 | 4      | 3      | 4      | 3      | 4      | 3      |
| 1986                 | 4      | 4      | 4      | 3      | 4      | 3      |
| 1987                 | 4      | 3      | 4      | 3      | 4      | 4      |
| 1988                 | 4      | 3      | 4      | 3      | 4      | 3      |
| 1989                 | 3      | 3      | 4      | 4      | 4      | 3      |
| 1990                 | 4      | 3      | 4      | 3      | 4      | 2      |
| 1991                 | 4      | 4      | 4      | 3      | 4      | 3      |
| 1992                 | 4      | 3      | 4      | 3      | 4      | 4      |
| 1993                 | 3      | 3      | 4      | 3      | 4      | 3      |
| 1994                 | 4      | 3      | 4      | 4      | 4      | 3      |
| 1995                 | 4      | 3      | 4      | 3      | 4      | 3      |

|      |   |   |   |   |   |   |
|------|---|---|---|---|---|---|
| 1996 | 4 | 4 | 4 | 3 | 4 | 3 |
| 1997 | 4 | 3 | 4 | 2 | 4 | 3 |
| 1998 | 4 | 3 | 4 | 2 | 4 | 3 |
| 1999 | 4 | 3 | 4 | 3 | 4 | 3 |
| 2000 | 4 | 2 | 3 | 2 | 2 | 2 |
| 2001 | 4 | 4 | 4 | 3 | 4 | 3 |
| 2002 | 4 | 3 | 4 | 3 | 4 | 3 |
| 2003 | 4 | 3 | 4 | 3 | 4 | 3 |
| 2004 | 4 | 3 | 4 | 4 | 3 | 2 |
| 2005 | 6 | 5 | 5 | 5 | 5 | 5 |
| 2006 | 6 | 6 | 6 | 6 | 6 | 6 |
| 2007 | 6 | 6 | 6 | 6 | 5 | 6 |
| 2008 | 5 | 6 | 6 | 6 | 6 | 6 |
| 2009 | 6 | 6 | 6 | 6 | 6 | 6 |
| 2010 | 6 | 6 | 7 | 6 | 7 | 6 |
| 2011 | 7 | 7 | 7 | 6 | 7 | 6 |
| 2012 | 6 | 7 | 7 | 6 | 7 | 7 |
| 2013 | 7 | 6 | 7 | 4 | 7 | 6 |
| 2014 | 4 | 6 | 7 | 6 | 6 | 7 |
| 2015 | 7 | 6 | 7 | 6 | 7 | 6 |
| 2016 | 7 | 7 | 7 | 6 | 7 | 6 |
| 2017 | 7 | 6 | 7 | 6 | 7 | 7 |
| 2018 | 7 | 6 | 7 | 6 | 7 | 6 |
| 2019 | 7 | 6 | 7 | 7 | 7 | 6 |
| 2020 | 7 | 6 | 7 | 6 | 7 | 6 |



| Piave – Brenta       |        |        |        |        |        |        |
|----------------------|--------|--------|--------|--------|--------|--------|
| HS – 2500-3000 m asl |        |        |        |        |        |        |
| Date                 | 01-feb | 01-mar | 01-apr | 15-apr | 01-mag | 01-giu |
| 1967                 | 0      | 0      | 0      | 0      | 0      | 0      |
| 1968                 | 0      | 0      | 0      | 0      | 0      | 0      |
| 1969                 | 0      | 0      | 0      | 0      | 0      | 0      |
| 1970                 | 0      | 0      | 0      | 0      | 0      | 0      |
| 1971                 | 0      | 0      | 0      | 0      | 0      | 0      |
| 1972                 | 0      | 0      | 0      | 0      | 0      | 0      |
| 1973                 | 0      | 0      | 0      | 0      | 0      | 0      |
| 1974                 | 0      | 0      | 0      | 0      | 0      | 0      |
| 1975                 | 0      | 0      | 0      | 0      | 0      | 0      |
| 1976                 | 0      | 0      | 0      | 0      | 0      | 0      |
| 1977                 | 0      | 0      | 0      | 0      | 0      | 0      |
| 1978                 | 0      | 0      | 0      | 0      | 0      | 0      |
| 1979                 | 0      | 0      | 0      | 0      | 0      | 0      |
| 1980                 | 0      | 0      | 0      | 0      | 0      | 0      |
| 1981                 | 0      | 0      | 0      | 0      | 0      | 0      |
| 1982                 | 0      | 0      | 0      | 0      | 0      | 0      |
| 1983                 | 0      | 0      | 0      | 0      | 0      | 0      |
| 1984                 | 0      | 0      | 0      | 0      | 0      | 0      |
| 1985                 | 0      | 0      | 0      | 0      | 0      | 0      |
| 1986                 | 0      | 0      | 0      | 0      | 0      | 0      |
| 1987                 | 0      | 0      | 0      | 0      | 0      | 0      |
| 1988                 | 0      | 0      | 0      | 0      | 0      | 0      |
| 1989                 | 0      | 0      | 0      | 0      | 0      | 0      |
| 1990                 | 0      | 0      | 0      | 0      | 0      | 0      |
| 1991                 | 0      | 0      | 0      | 0      | 0      | 0      |
| 1992                 | 0      | 0      | 0      | 0      | 0      | 0      |
| 1993                 | 0      | 0      | 0      | 0      | 0      | 0      |
| 1994                 | 0      | 0      | 0      | 0      | 0      | 0      |
| 1995                 | 0      | 0      | 0      | 0      | 0      | 0      |

|      |   |   |   |   |   |   |
|------|---|---|---|---|---|---|
| 1996 | 0 | 0 | 0 | 0 | 0 | 0 |
| 1997 | 0 | 0 | 0 | 0 | 0 | 0 |
| 1998 | 0 | 0 | 0 | 0 | 0 | 0 |
| 1999 | 0 | 0 | 0 | 0 | 0 | 0 |
| 2000 | 0 | 0 | 0 | 0 | 0 | 0 |
| 2001 | 0 | 0 | 0 | 0 | 0 | 0 |
| 2002 | 0 | 0 | 0 | 0 | 0 | 0 |
| 2003 | 0 | 0 | 0 | 0 | 0 | 0 |
| 2004 | 0 | 0 | 0 | 0 | 0 | 0 |
| 2005 | 2 | 2 | 2 | 2 | 2 | 2 |
| 2006 | 2 | 2 | 2 | 2 | 2 | 1 |
| 2007 | 2 | 2 | 2 | 2 | 2 | 2 |
| 2008 | 2 | 2 | 2 | 2 | 2 | 2 |
| 2009 | 2 | 2 | 2 | 2 | 2 | 2 |
| 2010 | 2 | 2 | 2 | 2 | 2 | 2 |
| 2011 | 2 | 2 | 2 | 2 | 2 | 2 |
| 2012 | 2 | 2 | 2 | 2 | 2 | 2 |
| 2013 | 1 | 2 | 0 | 2 | 1 | 2 |
| 2014 | 1 | 2 | 2 | 2 | 2 | 2 |
| 2015 | 2 | 2 | 2 | 2 | 2 | 2 |
| 2016 | 2 | 2 | 2 | 2 | 2 | 2 |
| 2017 | 2 | 2 | 2 | 2 | 2 | 2 |
| 2018 | 2 | 2 | 2 | 2 | 2 | 2 |
| 2019 | 2 | 2 | 2 | 2 | 2 | 2 |
| 2020 | 2 | 2 | 1 | 1 | 1 | 2 |

| Adige                |        |        |        |        |        |        |
|----------------------|--------|--------|--------|--------|--------|--------|
| HS – 1000-1500 m asl |        |        |        |        |        |        |
| Date                 | 01-feb | 01-mar | 01-apr | 15-apr | 01-mag | 01-giu |
| 1967                 | 1      | 1      | 1      | 1      | 1      | 1      |
| 1968                 | 1      | 1      | 1      | 1      | 1      | 1      |
| 1969                 | 1      | 1      | 1      | 1      | 1      | 1      |
| 1970                 | 1      | 1      | 1      | 1      | 0      | 1      |
| 1971                 | 1      | 1      | 1      | 1      | 1      | 1      |
| 1972                 | 1      | 1      | 1      | 1      | 1      | 1      |
| 1973                 | 1      | 1      | 1      | 1      | 1      | 1      |
| 1974                 | 1      | 1      | 1      | 1      | 1      | 1      |
| 1975                 | 1      | 1      | 1      | 1      | 1      | 1      |
| 1976                 | 1      | 1      | 1      | 1      | 1      | 1      |
| 1977                 | 1      | 1      | 1      | 1      | 1      | 1      |
| 1978                 | 1      | 1      | 1      | 1      | 1      | 1      |
| 1979                 | 1      | 1      | 1      | 1      | 1      | 1      |
| 1980                 | 1      | 1      | 1      | 1      | 1      | 1      |
| 1981                 | 1      | 1      | 1      | 1      | 1      | 1      |
| 1982                 | 1      | 1      | 1      | 1      | 1      | 1      |
| 1983                 | 1      | 1      | 1      | 1      | 1      | 1      |
| 1984                 | 1      | 1      | 1      | 1      | 1      | 1      |
| 1985                 | 1      | 1      | 1      | 1      | 1      | 1      |
| 1986                 | 1      | 1      | 1      | 1      | 1      | 1      |
| 1987                 | 1      | 1      | 1      | 1      | 1      | 1      |
| 1988                 | 1      | 1      | 1      | 1      | 1      | 1      |
| 1989                 | 1      | 1      | 1      | 1      | 1      | 1      |
| 1990                 | 0      | 0      | 0      | 0      | 0      | 0      |
| 1991                 | 0      | 0      | 0      | 0      | 0      | 0      |
| 1992                 | 0      | 0      | 0      | 0      | 0      | 1      |
| 1993                 | 0      | 0      | 0      | 0      | 0      | 0      |
| 1994                 | 1      | 1      | 1      | 1      | 1      | 1      |
| 1995                 | 1      | 1      | 0      | 1      | 1      | 1      |

|      |   |   |   |   |   |   |
|------|---|---|---|---|---|---|
| 1996 | 0 | 0 | 0 | 0 | 0 | 0 |
| 1997 | 0 | 0 | 0 | 0 | 1 | 0 |
| 1998 | 1 | 1 | 1 | 1 | 1 | 1 |
| 1999 | 1 | 1 | 1 | 1 | 0 | 1 |
| 2000 | 1 | 0 | 1 | 1 | 1 | 1 |
| 2001 | 1 | 1 | 1 | 1 | 1 | 1 |
| 2002 | 1 | 1 | 1 | 1 | 1 | 1 |
| 2003 | 1 | 1 | 1 | 1 | 1 | 1 |
| 2004 | 1 | 1 | 1 | 1 | 1 | 1 |
| 2005 | 1 | 1 | 1 | 1 | 1 | 1 |
| 2006 | 0 | 0 | 0 | 0 | 0 | 0 |
| 2007 | 0 | 0 | 0 | 0 | 0 | 0 |
| 2008 | 0 | 0 | 0 | 0 | 0 | 0 |
| 2009 | 1 | 1 | 1 | 0 | 0 | 1 |
| 2010 | 1 | 1 | 0 | 0 | 0 | 1 |
| 2011 | 1 | 1 | 1 | 1 | 1 | 1 |
| 2012 | 1 | 1 | 1 | 1 | 1 | 1 |
| 2013 | 1 | 1 | 1 | 1 | 1 | 1 |
| 2014 | 1 | 1 | 1 | 1 | 1 | 1 |
| 2015 | 1 | 1 | 1 | 0 | 0 | 1 |
| 2016 | 1 | 1 | 1 | 1 | 1 | 1 |
| 2017 | 1 | 0 | 0 | 1 | 0 | 1 |
| 2018 | 1 | 1 | 1 | 1 | 1 | 1 |
| 2019 | 0 | 0 | 1 | 1 | 1 | 1 |
| 2020 | 1 | 1 | 1 | 1 | 1 | 1 |

| Adige                |        |        |        |        |        |        |
|----------------------|--------|--------|--------|--------|--------|--------|
| HS – 1500-2000 m asl |        |        |        |        |        |        |
| Date                 | 01-feb | 01-mar | 01-apr | 15-apr | 01-mag | 01-giu |
| 1967                 | 8      | 8      | 8      | 8      | 8      | 6      |
| 1968                 | 8      | 8      | 8      | 8      | 8      | 8      |
| 1969                 | 8      | 8      | 8      | 8      | 8      | 8      |
| 1970                 | 8      | 8      | 8      | 8      | 7      | 8      |
| 1971                 | 8      | 8      | 8      | 8      | 8      | 8      |
| 1972                 | 8      | 8      | 8      | 8      | 8      | 8      |
| 1973                 | 8      | 8      | 8      | 8      | 8      | 8      |
| 1974                 | 8      | 8      | 8      | 8      | 8      | 8      |
| 1975                 | 7      | 8      | 8      | 7      | 8      | 8      |
| 1976                 | 8      | 8      | 8      | 8      | 8      | 8      |
| 1977                 | 8      | 8      | 8      | 8      | 8      | 8      |
| 1978                 | 8      | 8      | 8      | 7      | 8      | 8      |
| 1979                 | 8      | 8      | 8      | 8      | 8      | 8      |
| 1980                 | 8      | 8      | 8      | 8      | 8      | 8      |
| 1981                 | 8      | 8      | 8      | 8      | 8      | 8      |
| 1982                 | 8      | 8      | 8      | 8      | 8      | 8      |
| 1983                 | 8      | 8      | 8      | 8      | 8      | 8      |
| 1984                 | 8      | 7      | 8      | 8      | 8      | 8      |
| 1985                 | 8      | 8      | 8      | 8      | 8      | 8      |
| 1986                 | 8      | 8      | 8      | 8      | 8      | 8      |
| 1987                 | 8      | 8      | 8      | 8      | 8      | 8      |
| 1988                 | 8      | 8      | 8      | 7      | 7      | 8      |
| 1989                 | 8      | 8      | 8      | 8      | 8      | 8      |
| 1990                 | 0      | 0      | 0      | 0      | 0      | 0      |
| 1991                 | 0      | 0      | 0      | 0      | 0      | 0      |
| 1992                 | 0      | 0      | 0      | 0      | 0      | 8      |
| 1993                 | 0      | 0      | 0      | 0      | 0      | 0      |
| 1994                 | 6      | 6      | 6      | 6      | 6      | 6      |
| 1995                 | 6      | 6      | 6      | 6      | 6      | 6      |

|      |   |   |   |   |   |   |
|------|---|---|---|---|---|---|
| 1996 | 0 | 0 | 0 | 0 | 0 | 0 |
| 1997 | 0 | 0 | 0 | 0 | 4 | 0 |
| 1998 | 6 | 6 | 6 | 4 | 6 | 6 |
| 1999 | 6 | 6 | 6 | 6 | 4 | 6 |
| 2000 | 6 | 6 | 6 | 6 | 6 | 6 |
| 2001 | 6 | 6 | 6 | 6 | 6 | 6 |
| 2002 | 6 | 6 | 6 | 6 | 5 | 6 |
| 2003 | 6 | 6 | 6 | 6 | 6 | 6 |
| 2004 | 6 | 5 | 6 | 6 | 6 | 6 |
| 2005 | 6 | 6 | 6 | 6 | 6 | 6 |
| 2006 | 0 | 0 | 0 | 0 | 0 | 0 |
| 2007 | 0 | 0 | 0 | 0 | 0 | 0 |
| 2008 | 0 | 0 | 0 | 0 | 0 | 0 |
| 2009 | 6 | 6 | 6 | 6 | 5 | 6 |
| 2010 | 6 | 4 | 6 | 6 | 5 | 6 |
| 2011 | 6 | 6 | 5 | 6 | 6 | 6 |
| 2012 | 6 | 6 | 6 | 6 | 6 | 6 |
| 2013 | 6 | 6 | 6 | 6 | 6 | 6 |
| 2014 | 6 | 6 | 6 | 6 | 6 | 6 |
| 2015 | 6 | 6 | 6 | 3 | 3 | 6 |
| 2016 | 6 | 6 | 6 | 6 | 6 | 6 |
| 2017 | 6 | 4 | 2 | 6 | 5 | 4 |
| 2018 | 6 | 6 | 6 | 6 | 6 | 6 |
| 2019 | 6 | 6 | 6 | 6 | 6 | 4 |
| 2020 | 6 | 6 | 5 | 5 | 6 | 6 |

| Adige                |        |        |        |        |        |        |
|----------------------|--------|--------|--------|--------|--------|--------|
| HS – 2000-2500 m asl |        |        |        |        |        |        |
| Date                 | 01-feb | 01-mar | 01-apr | 15-apr | 01-mag | 01-giu |
| 1967                 | 5      | 5      | 5      | 5      | 5      | 5      |
| 1968                 | 5      | 5      | 5      | 5      | 5      | 5      |
| 1969                 | 5      | 5      | 5      | 5      | 5      | 5      |
| 1970                 | 5      | 5      | 5      | 5      | 5      | 5      |
| 1971                 | 5      | 5      | 5      | 5      | 5      | 5      |
| 1972                 | 4      | 5      | 5      | 5      | 5      | 5      |
| 1973                 | 5      | 5      | 5      | 5      | 5      | 5      |
| 1974                 | 5      | 5      | 5      | 5      | 4      | 5      |
| 1975                 | 3      | 5      | 5      | 4      | 5      | 5      |
| 1976                 | 5      | 5      | 5      | 5      | 5      | 5      |
| 1977                 | 5      | 5      | 4      | 5      | 5      | 5      |
| 1978                 | 4      | 5      | 5      | 4      | 5      | 5      |
| 1979                 | 5      | 5      | 5      | 5      | 5      | 5      |
| 1980                 | 5      | 5      | 5      | 5      | 5      | 5      |
| 1981                 | 5      | 5      | 5      | 5      | 5      | 5      |
| 1982                 | 5      | 5      | 5      | 5      | 5      | 5      |
| 1983                 | 5      | 5      | 5      | 5      | 5      | 5      |
| 1984                 | 5      | 3      | 5      | 5      | 5      | 5      |
| 1985                 | 5      | 5      | 5      | 5      | 5      | 5      |
| 1986                 | 5      | 5      | 5      | 5      | 4      | 5      |
| 1987                 | 5      | 5      | 5      | 5      | 5      | 5      |
| 1988                 | 5      | 5      | 5      | 3      | 3      | 5      |
| 1989                 | 5      | 5      | 5      | 5      | 5      | 5      |
| 1990                 | 0      | 0      | 0      | 0      | 0      | 0      |
| 1991                 | 0      | 0      | 0      | 0      | 0      | 0      |
| 1992                 | 0      | 0      | 0      | 0      | 0      | 5      |
| 1993                 | 0      | 0      | 0      | 0      | 0      | 0      |
| 1994                 | 3      | 3      | 3      | 3      | 3      | 3      |
| 1995                 | 3      | 3      | 3      | 3      | 3      | 3      |

|      |   |   |   |   |   |   |
|------|---|---|---|---|---|---|
| 1996 | 0 | 0 | 0 | 0 | 0 | 0 |
| 1997 | 0 | 0 | 0 | 0 | 2 | 0 |
| 1998 | 3 | 3 | 3 | 3 | 3 | 3 |
| 1999 | 3 | 3 | 3 | 3 | 3 | 3 |
| 2000 | 3 | 3 | 1 | 3 | 3 | 3 |
| 2001 | 3 | 1 | 3 | 3 | 3 | 3 |
| 2002 | 3 | 3 | 3 | 3 | 3 | 3 |
| 2003 | 3 | 3 | 3 | 3 | 3 | 3 |
| 2004 | 2 | 3 | 3 | 3 | 3 | 3 |
| 2005 | 3 | 3 | 3 | 3 | 3 | 3 |
| 2006 | 0 | 0 | 0 | 0 | 0 | 0 |
| 2007 | 0 | 0 | 0 | 0 | 0 | 0 |
| 2008 | 0 | 0 | 0 | 0 | 0 | 0 |
| 2009 | 3 | 3 | 3 | 3 | 3 | 3 |
| 2010 | 3 | 2 | 4 | 4 | 4 | 4 |
| 2011 | 4 | 4 | 4 | 4 | 4 | 4 |
| 2012 | 4 | 4 | 4 | 4 | 4 | 4 |
| 2013 | 4 | 4 | 4 | 4 | 3 | 4 |
| 2014 | 4 | 4 | 3 | 3 | 4 | 4 |
| 2015 | 3 | 4 | 3 | 3 | 4 | 4 |
| 2016 | 4 | 4 | 4 | 4 | 4 | 3 |
| 2017 | 4 | 2 | 3 | 4 | 2 | 2 |
| 2018 | 4 | 4 | 4 | 4 | 4 | 4 |
| 2019 | 4 | 4 | 4 | 4 | 4 | 2 |
| 2020 | 4 | 2 | 2 | 2 | 2 | 4 |



| Adige                |        |        |        |        |        |        |
|----------------------|--------|--------|--------|--------|--------|--------|
| HS – 2500-3000 m asl |        |        |        |        |        |        |
| Date                 | 01-feb | 01-mar | 01-apr | 15-apr | 01-mag | 01-giu |
| 1967                 | 6      | 6      | 6      | 6      | 6      | 6      |
| 1968                 | 6      | 6      | 6      | 6      | 6      | 6      |
| 1969                 | 6      | 6      | 6      | 6      | 6      | 6      |
| 1970                 | 6      | 6      | 6      | 6      | 6      | 6      |
| 1971                 | 6      | 6      | 6      | 6      | 6      | 6      |
| 1972                 | 6      | 6      | 6      | 6      | 6      | 6      |
| 1973                 | 6      | 6      | 5      | 6      | 6      | 6      |
| 1974                 | 6      | 6      | 6      | 6      | 5      | 5      |
| 1975                 | 6      | 6      | 6      | 3      | 6      | 6      |
| 1976                 | 6      | 6      | 6      | 6      | 6      | 6      |
| 1977                 | 5      | 5      | 5      | 5      | 3      | 5      |
| 1978                 | 6      | 6      | 6      | 6      | 6      | 6      |
| 1979                 | 5      | 5      | 5      | 5      | 5      | 5      |
| 1980                 | 6      | 6      | 6      | 6      | 6      | 6      |
| 1981                 | 6      | 6      | 6      | 6      | 6      | 5      |
| 1982                 | 6      | 6      | 6      | 6      | 6      | 6      |
| 1983                 | 6      | 6      | 6      | 6      | 5      | 5      |
| 1984                 | 6      | 5      | 5      | 5      | 6      | 5      |
| 1985                 | 5      | 5      | 5      | 5      | 6      | 5      |
| 1986                 | 5      | 5      | 5      | 5      | 6      | 6      |
| 1987                 | 6      | 5      | 6      | 6      | 6      | 6      |
| 1988                 | 5      | 6      | 5      | 6      | 6      | 6      |
| 1989                 | 6      | 3      | 6      | 6      | 5      | 6      |
| 1990                 | 0      | 0      | 0      | 0      | 0      | 0      |
| 1991                 | 0      | 0      | 0      | 0      | 0      | 0      |
| 1992                 | 0      | 0      | 0      | 0      | 0      | 1      |
| 1993                 | 0      | 0      | 0      | 0      | 0      | 0      |
| 1994                 | 1      | 1      | 1      | 1      | 1      | 1      |
| 1995                 | 1      | 1      | 1      | 1      | 1      | 1      |

|      |   |   |   |   |   |   |
|------|---|---|---|---|---|---|
| 1996 | 0 | 0 | 0 | 0 | 0 | 0 |
| 1997 | 0 | 0 | 0 | 0 | 1 | 0 |
| 1998 | 1 | 1 | 1 | 1 | 1 | 1 |
| 1999 | 5 | 5 | 5 | 5 | 5 | 5 |
| 2000 | 5 | 5 | 3 | 5 | 5 | 5 |
| 2001 | 4 | 4 | 3 | 4 | 5 | 5 |
| 2002 | 5 | 5 | 5 | 4 | 5 | 5 |
| 2003 | 5 | 5 | 5 | 5 | 5 | 5 |
| 2004 | 4 | 3 | 5 | 5 | 5 | 5 |
| 2005 | 5 | 5 | 5 | 5 | 5 | 5 |
| 2006 | 0 | 0 | 0 | 0 | 0 | 0 |
| 2007 | 0 | 0 | 0 | 0 | 0 | 0 |
| 2008 | 0 | 0 | 0 | 0 | 0 | 0 |
| 2009 | 3 | 5 | 5 | 5 | 5 | 5 |
| 2010 | 5 | 0 | 4 | 5 | 5 | 5 |
| 2011 | 4 | 4 | 5 | 5 | 5 | 5 |
| 2012 | 5 | 5 | 5 | 5 | 5 | 5 |
| 2013 | 5 | 5 | 4 | 4 | 4 | 3 |
| 2014 | 4 | 4 | 3 | 4 | 3 | 5 |
| 2015 | 4 | 4 | 4 | 5 | 5 | 5 |
| 2016 | 5 | 4 | 5 | 5 | 5 | 5 |
| 2017 | 4 | 1 | 5 | 5 | 0 | 1 |
| 2018 | 3 | 3 | 4 | 1 | 3 | 5 |
| 2019 | 4 | 5 | 4 | 2 | 4 | 5 |
| 2020 | 3 | 2 | 3 | 3 | 3 | 6 |

## Oglio – Chiese – Sarca

## HS – 1000-1500 m asl

| Date | 01-feb | 01-mar | 01-apr | 15-apr | 01-mag | 01-giu |
|------|--------|--------|--------|--------|--------|--------|
| 1967 | 14     | 13     | 14     | 13     | 14     | 14     |
| 1968 | 14     | 14     | 13     | 14     | 14     | 14     |
| 1969 | 13     | 13     | 14     | 14     | 14     | 14     |
| 1970 | 14     | 10     | 14     | 14     | 14     | 14     |
| 1971 | 14     | 14     | 14     | 14     | 14     | 14     |
| 1972 | 14     | 14     | 14     | 14     | 14     | 14     |
| 1973 | 14     | 14     | 14     | 14     | 14     | 14     |
| 1974 | 14     | 14     | 14     | 14     | 14     | 14     |
| 1975 | 14     | 14     | 14     | 13     | 14     | 14     |
| 1976 | 14     | 14     | 14     | 14     | 14     | 14     |
| 1977 | 14     | 14     | 14     | 14     | 14     | 14     |
| 1978 | 14     | 14     | 14     | 14     | 14     | 14     |
| 1979 | 14     | 14     | 14     | 14     | 14     | 14     |
| 1980 | 14     | 14     | 14     | 14     | 14     | 14     |
| 1981 | 14     | 14     | 14     | 14     | 14     | 14     |
| 1982 | 14     | 14     | 14     | 14     | 14     | 14     |
| 1983 | 14     | 14     | 14     | 14     | 14     | 14     |
| 1984 | 14     | 14     | 14     | 10     | 14     | 14     |
| 1985 | 14     | 14     | 14     | 14     | 14     | 14     |
| 1986 | 14     | 14     | 14     | 13     | 14     | 14     |
| 1987 | 14     | 14     | 14     | 14     | 14     | 14     |
| 1988 | 14     | 14     | 14     | 14     | 14     | 10     |
| 1989 | 14     | 14     | 14     | 14     | 14     | 4      |
| 1990 | 10     | 10     | 10     | 10     | 10     | 10     |
| 1991 | 10     | 0      | 10     | 0      | 10     | 10     |
| 1992 | 10     | 0      | 10     | 0      | 0      | 14     |
| 1993 | 0      | 0      | 0      | 0      | 0      | 0      |
| 1994 | 8      | 8      | 8      | 8      | 8      | 8      |
| 1995 | 8      | 8      | 8      | 8      | 8      | 8      |

|      |    |    |    |    |    |    |
|------|----|----|----|----|----|----|
| 1996 | 0  | 0  | 0  | 0  | 0  | 10 |
| 1997 | 10 | 0  | 10 | 10 | 10 | 0  |
| 1998 | 8  | 8  | 8  | 8  | 8  | 8  |
| 1999 | 8  | 8  | 8  | 8  | 8  | 8  |
| 2000 | 8  | 7  | 8  | 8  | 8  | 8  |
| 2001 | 8  | 8  | 8  | 8  | 8  | 8  |
| 2002 | 8  | 8  | 8  | 8  | 8  | 8  |
| 2003 | 8  | 8  | 8  | 8  | 8  | 8  |
| 2004 | 8  | 8  | 8  | 8  | 8  | 8  |
| 2005 | 8  | 8  | 8  | 8  | 8  | 8  |
| 2006 | 0  | 0  | 0  | 0  | 0  | 0  |
| 2007 | 10 | 10 | 10 | 10 | 10 | 9  |
| 2008 | 9  | 10 | 10 | 10 | 10 | 10 |
| 2009 | 8  | 8  | 8  | 8  | 8  | 8  |
| 2010 | 8  | 10 | 7  | 7  | 7  | 7  |
| 2011 | 8  | 8  | 8  | 8  | 8  | 8  |
| 2012 | 8  | 8  | 8  | 8  | 8  | 8  |
| 2013 | 2  | 2  | 3  | 3  | 3  | 3  |
| 2014 | 3  | 4  | 4  | 4  | 4  | 3  |
| 2015 | 4  | 4  | 4  | 4  | 3  | 3  |
| 2016 | 4  | 4  | 4  | 4  | 4  | 4  |
| 2017 | 4  | 4  | 4  | 3  | 2  | 3  |
| 2018 | 4  | 3  | 3  | 2  | 3  | 3  |
| 2019 | 3  | 2  | 2  | 3  | 3  | 0  |
| 2020 | 3  | 1  | 3  | 3  | 3  | 14 |

## Oglio – Chiese – Sarca

HS – 1500-2000 m asl

| Date | 01-feb | 01-mar | 01-apr | 15-apr | 01-mag | 01-giu |
|------|--------|--------|--------|--------|--------|--------|
| 1967 | 13     | 16     | 16     | 16     | 15     | 15     |
| 1968 | 17     | 17     | 17     | 17     | 17     | 17     |
| 1969 | 17     | 15     | 17     | 17     | 17     | 15     |
| 1970 | 17     | 17     | 17     | 17     | 17     | 17     |
| 1971 | 17     | 17     | 17     | 16     | 17     | 17     |
| 1972 | 17     | 17     | 17     | 17     | 17     | 17     |
| 1973 | 17     | 17     | 17     | 17     | 17     | 17     |
| 1974 | 17     | 17     | 17     | 17     | 17     | 16     |
| 1975 | 17     | 17     | 16     | 11     | 15     | 17     |
| 1976 | 17     | 17     | 17     | 17     | 16     | 15     |
| 1977 | 16     | 15     | 17     | 17     | 17     | 16     |
| 1978 | 16     | 17     | 17     | 17     | 17     | 16     |
| 1979 | 16     | 17     | 15     | 17     | 17     | 16     |
| 1980 | 17     | 17     | 17     | 16     | 17     | 17     |
| 1981 | 16     | 16     | 16     | 16     | 16     | 16     |
| 1982 | 17     | 17     | 16     | 16     | 16     | 17     |
| 1983 | 17     | 17     | 16     | 16     | 16     | 17     |
| 1984 | 16     | 15     | 15     | 15     | 16     | 17     |
| 1985 | 17     | 17     | 15     | 16     | 16     | 17     |
| 1986 | 17     | 15     | 15     | 15     | 13     | 17     |
| 1987 | 17     | 17     | 17     | 14     | 15     | 17     |
| 1988 | 17     | 17     | 15     | 15     | 16     | 16     |
| 1989 | 15     | 15     | 14     | 15     | 13     | 10     |
| 1990 | 12     | 12     | 11     | 10     | 11     | 12     |
| 1991 | 12     | 5      | 11     | 3      | 10     | 12     |
| 1992 | 10     | 5      | 12     | 3      | 4      | 15     |
| 1993 | 3      | 5      | 5      | 4      | 4      | 5      |
| 1994 | 12     | 14     | 13     | 13     | 13     | 13     |
| 1995 | 12     | 14     | 12     | 12     | 12     | 13     |

|      |    |    |    |    |    |    |
|------|----|----|----|----|----|----|
| 1996 | 3  | 5  | 3  | 3  | 3  | 12 |
| 1997 | 10 | 5  | 11 | 11 | 10 | 2  |
| 1998 | 10 | 14 | 13 | 11 | 13 | 13 |
| 1999 | 14 | 14 | 12 | 12 | 12 | 12 |
| 2000 | 14 | 13 | 13 | 13 | 11 | 14 |
| 2001 | 14 | 13 | 13 | 13 | 13 | 12 |
| 2002 | 13 | 12 | 12 | 12 | 11 | 12 |
| 2003 | 14 | 13 | 11 | 12 | 9  | 14 |
| 2004 | 14 | 13 | 13 | 13 | 13 | 12 |
| 2005 | 14 | 14 | 14 | 12 | 11 | 12 |
| 2006 | 5  | 5  | 5  | 5  | 5  | 4  |
| 2007 | 12 | 12 | 12 | 11 | 9  | 11 |
| 2008 | 10 | 11 | 10 | 8  | 10 | 11 |
| 2009 | 13 | 10 | 13 | 12 | 12 | 12 |
| 2010 | 14 | 11 | 14 | 13 | 13 | 14 |
| 2011 | 14 | 14 | 13 | 13 | 13 | 13 |
| 2012 | 14 | 14 | 14 | 13 | 12 | 14 |
| 2013 | 9  | 9  | 8  | 8  | 7  | 10 |
| 2014 | 4  | 9  | 9  | 8  | 8  | 8  |
| 2015 | 11 | 10 | 10 | 9  | 8  | 11 |
| 2016 | 7  | 8  | 8  | 8  | 8  | 7  |
| 2017 | 7  | 8  | 7  | 7  | 7  | 9  |
| 2018 | 7  | 9  | 7  | 5  | 7  | 9  |
| 2019 | 8  | 10 | 10 | 10 | 10 | 6  |
| 2020 | 10 | 8  | 7  | 7  | 7  | 18 |

## Oglio – Chiese – Sarca

HS – 2000-2500 m asl

| Date | 01-feb | 01-mar | 01-apr | 15-apr | 01-mag | 01-giu |
|------|--------|--------|--------|--------|--------|--------|
| 1967 | 20     | 21     | 20     | 20     | 21     | 21     |
| 1968 | 21     | 21     | 21     | 21     | 21     | 21     |
| 1969 | 21     | 21     | 21     | 21     | 21     | 14     |
| 1970 | 21     | 20     | 21     | 21     | 21     | 21     |
| 1971 | 19     | 21     | 21     | 20     | 21     | 20     |
| 1972 | 20     | 21     | 21     | 20     | 21     | 21     |
| 1973 | 20     | 18     | 20     | 21     | 21     | 21     |
| 1974 | 21     | 21     | 21     | 21     | 20     | 21     |
| 1975 | 21     | 21     | 19     | 11     | 16     | 21     |
| 1976 | 21     | 21     | 21     | 21     | 21     | 15     |
| 1977 | 19     | 14     | 15     | 17     | 21     | 21     |
| 1978 | 18     | 18     | 20     | 19     | 20     | 21     |
| 1979 | 15     | 20     | 16     | 21     | 17     | 19     |
| 1980 | 18     | 18     | 17     | 13     | 19     | 21     |
| 1981 | 21     | 20     | 18     | 19     | 19     | 19     |
| 1982 | 20     | 19     | 19     | 19     | 19     | 20     |
| 1983 | 20     | 19     | 18     | 18     | 18     | 20     |
| 1984 | 19     | 18     | 19     | 19     | 19     | 20     |
| 1985 | 20     | 19     | 18     | 19     | 19     | 20     |
| 1986 | 14     | 13     | 14     | 14     | 9      | 20     |
| 1987 | 14     | 14     | 13     | 11     | 12     | 15     |
| 1988 | 14     | 13     | 13     | 12     | 12     | 21     |
| 1989 | 13     | 11     | 14     | 19     | 11     | 15     |
| 1990 | 16     | 15     | 15     | 15     | 15     | 16     |
| 1991 | 16     | 8      | 14     | 7      | 14     | 16     |
| 1992 | 8      | 10     | 15     | 8      | 8      | 13     |
| 1993 | 2      | 10     | 10     | 10     | 8      | 10     |
| 1994 | 8      | 14     | 15     | 15     | 15     | 13     |
| 1995 | 8      | 15     | 14     | 14     | 14     | 16     |

|      |    |    |    |    |    |    |
|------|----|----|----|----|----|----|
| 1996 | 1  | 9  | 9  | 8  | 8  | 15 |
| 1997 | 8  | 9  | 15 | 14 | 14 | 1  |
| 1998 | 8  | 15 | 14 | 14 | 14 | 15 |
| 1999 | 16 | 16 | 14 | 14 | 14 | 11 |
| 2000 | 16 | 16 | 14 | 14 | 12 | 11 |
| 2001 | 16 | 14 | 15 | 15 | 15 | 12 |
| 2002 | 14 | 16 | 15 | 14 | 14 | 8  |
| 2003 | 16 | 16 | 14 | 14 | 13 | 14 |
| 2004 | 14 | 14 | 14 | 14 | 14 | 12 |
| 2005 | 15 | 13 | 14 | 14 | 14 | 7  |
| 2006 | 9  | 8  | 8  | 8  | 8  | 9  |
| 2007 | 16 | 15 | 14 | 14 | 14 | 16 |
| 2008 | 13 | 14 | 14 | 14 | 14 | 15 |
| 2009 | 16 | 8  | 15 | 16 | 16 | 18 |
| 2010 | 18 | 15 | 17 | 17 | 17 | 18 |
| 2011 | 18 | 17 | 17 | 16 | 15 | 18 |
| 2012 | 18 | 18 | 18 | 19 | 19 | 19 |
| 2013 | 14 | 16 | 16 | 14 | 15 | 17 |
| 2014 | 6  | 18 | 18 | 16 | 16 | 17 |
| 2015 | 18 | 16 | 18 | 17 | 18 | 19 |
| 2016 | 14 | 13 | 18 | 12 | 12 | 12 |
| 2017 | 10 | 12 | 9  | 8  | 8  | 13 |
| 2018 | 17 | 16 | 12 | 11 | 17 | 17 |
| 2019 | 10 | 8  | 8  | 10 | 7  | 5  |
| 2020 | 8  | 3  | 7  | 7  | 7  | 12 |



## Oglio – Chiese – Sarca

HS – 2500-3000 m asl

| Date | 01-feb | 01-mar | 01-apr | 15-apr | 01-mag | 01-giu |
|------|--------|--------|--------|--------|--------|--------|
| 1967 | 8      | 8      | 8      | 7      | 6      | 8      |
| 1968 | 8      | 8      | 8      | 8      | 8      | 8      |
| 1969 | 8      | 8      | 8      | 8      | 8      | 8      |
| 1970 | 8      | 6      | 8      | 8      | 8      | 8      |
| 1971 | 8      | 8      | 8      | 8      | 8      | 8      |
| 1972 | 8      | 8      | 7      | 6      | 8      | 8      |
| 1973 | 8      | 8      | 7      | 7      | 7      | 8      |
| 1974 | 8      | 8      | 8      | 7      | 8      | 8      |
| 1975 | 7      | 7      | 6      | 2      | 8      | 8      |
| 1976 | 7      | 7      | 7      | 7      | 7      | 8      |
| 1977 | 4      | 3      | 3      | 7      | 7      | 8      |
| 1978 | 4      | 7      | 7      | 7      | 7      | 8      |
| 1979 | 3      | 7      | 7      | 7      | 7      | 6      |
| 1980 | 5      | 6      | 6      | 6      | 6      | 6      |
| 1981 | 7      | 7      | 7      | 7      | 7      | 8      |
| 1982 | 7      | 7      | 7      | 7      | 7      | 7      |
| 1983 | 7      | 7      | 7      | 7      | 7      | 7      |
| 1984 | 7      | 7      | 7      | 7      | 7      | 8      |
| 1985 | 7      | 7      | 7      | 7      | 7      | 8      |
| 1986 | 7      | 7      | 7      | 7      | 3      | 8      |
| 1987 | 4      | 7      | 7      | 3      | 3      | 5      |
| 1988 | 7      | 7      | 4      | 7      | 7      | 8      |
| 1989 | 3      | 3      | 7      | 7      | 2      | 4      |
| 1990 | 7      | 7      | 7      | 7      | 7      | 8      |
| 1991 | 7      | 4      | 7      | 4      | 7      | 7      |
| 1992 | 3      | 4      | 7      | 4      | 4      | 5      |
| 1993 | 0      | 4      | 4      | 4      | 4      | 5      |
| 1994 | 3      | 7      | 7      | 7      | 7      | 8      |
| 1995 | 3      | 7      | 7      | 7      | 7      | 8      |

|      |   |   |   |   |   |    |
|------|---|---|---|---|---|----|
| 1996 | 0 | 4 | 4 | 4 | 4 | 8  |
| 1997 | 3 | 4 | 7 | 7 | 7 | 1  |
| 1998 | 3 | 7 | 7 | 7 | 7 | 8  |
| 1999 | 7 | 7 | 7 | 7 | 7 | 4  |
| 2000 | 7 | 7 | 7 | 7 | 7 | 4  |
| 2001 | 7 | 7 | 7 | 7 | 7 | 8  |
| 2002 | 7 | 7 | 7 | 7 | 7 | 7  |
| 2003 | 7 | 7 | 7 | 7 | 7 | 6  |
| 2004 | 7 | 8 | 7 | 7 | 7 | 8  |
| 2005 | 7 | 6 | 7 | 7 | 7 | 4  |
| 2006 | 4 | 4 | 4 | 4 | 4 | 5  |
| 2007 | 7 | 7 | 7 | 7 | 8 | 8  |
| 2008 | 7 | 7 | 7 | 7 | 7 | 6  |
| 2009 | 7 | 3 | 4 | 7 | 8 | 8  |
| 2010 | 7 | 7 | 7 | 7 | 7 | 8  |
| 2011 | 8 | 7 | 9 | 9 | 8 | 10 |
| 2012 | 7 | 7 | 7 | 5 | 7 | 8  |
| 2013 | 3 | 6 | 6 | 5 | 2 | 7  |
| 2014 | 3 | 9 | 9 | 6 | 2 | 6  |
| 2015 | 8 | 8 | 8 | 5 | 9 | 5  |
| 2016 | 4 | 4 | 4 | 5 | 4 | 4  |
| 2017 | 4 | 5 | 4 | 4 | 4 | 5  |
| 2018 | 5 | 4 | 5 | 5 | 5 | 3  |
| 2019 | 5 | 5 | 5 | 6 | 4 | 3  |
| 2020 | 3 | 3 | 3 | 3 | 1 | 6  |

| Serio - Brembo       |        |        |        |        |        |        |
|----------------------|--------|--------|--------|--------|--------|--------|
| HS – 1000-1500 m asl |        |        |        |        |        |        |
| Date                 | 01-feb | 01-mar | 01-apr | 15-apr | 01-mag | 01-giu |
| 1967                 | 1      | 1      | 1      | 0      | 0      | 1      |
| 1968                 | 1      | 1      | 0      | 0      | 0      | 1      |
| 1969                 | 1      | 1      | 1      | 0      | 0      | 1      |
| 1970                 | 1      | 1      | 1      | 1      | 0      | 1      |
| 1971                 | 1      | 1      | 1      | 0      | 0      | 1      |
| 1972                 | 1      | 1      | 0      | 0      | 0      | 1      |
| 1973                 | 1      | 1      | 0      | 1      | 0      | 1      |
| 1974                 | 1      | 1      | 0      | 0      | 0      | 1      |
| 1975                 | 1      | 1      | 1      | 1      | 0      | 1      |
| 1976                 | 1      | 1      | 0      | 0      | 0      | 1      |
| 1977                 | 1      | 1      | 1      | 1      | 0      | 1      |
| 1978                 | 1      | 1      | 1      | 1      | 0      | 1      |
| 1979                 | 1      | 1      | 1      | 1      | 0      | 1      |
| 1980                 | 1      | 1      | 1      | 1      | 0      | 1      |
| 1981                 | 0      | 0      | 0      | 0      | 0      | 1      |
| 1982                 | 1      | 1      | 1      | 0      | 0      | 1      |
| 1983                 | 0      | 1      | 0      | 0      | 0      | 1      |
| 1984                 | 1      | 1      | 1      | 1      | 1      | 1      |
| 1985                 | 1      | 1      | 1      | 1      | 0      | 1      |
| 1986                 | 1      | 1      | 1      | 1      | 0      | 1      |
| 1987                 | 1      | 1      | 1      | 1      | 0      | 1      |
| 1988                 | 1      | 1      | 1      | 0      | 0      | 1      |
| 1989                 | 1      | 1      | 0      | 0      | 0      | 1      |
| 1990                 | 0      | 0      | 0      | 0      | 0      | 1      |
| 1991                 | 1      | 1      | 0      | 0      | 0      | 1      |
| 1992                 | 1      | 0      | 1      | 0      | 0      | 1      |
| 1993                 | 0      | 1      | 0      | 0      | 0      | 1      |
| 1994                 | 1      | 1      | 0      | 0      | 0      | 1      |
| 1995                 | 1      | 1      | 1      | 0      | 0      | 1      |

|      |   |   |   |   |   |   |
|------|---|---|---|---|---|---|
| 1996 | 1 | 1 | 0 | 0 | 0 | 1 |
| 1997 | 1 | 1 | 0 | 0 | 0 | 1 |
| 1998 | 1 | 0 | 0 | 1 | 0 | 1 |
| 1999 | 1 | 1 | 1 | 0 | 0 | 1 |
| 2000 | 1 | 1 | 1 | 0 | 0 | 1 |
| 2001 | 1 | 1 | 0 | 0 | 0 | 1 |
| 2002 | 0 | 0 | 0 | 0 | 0 | 1 |
| 2003 | 0 | 0 | 0 | 0 | 0 | 1 |
| 2004 | 0 | 1 | 1 | 0 | 0 | 1 |
| 2005 | 1 | 1 | 0 | 0 | 0 | 1 |
| 2006 | 1 | 1 | 0 | 0 | 0 | 1 |
| 2007 | 1 | 1 | 0 | 0 | 0 | 1 |
| 2008 | 1 | 1 | 1 | 1 | 0 | 0 |
| 2009 | 0 | 0 | 1 | 1 | 1 | 0 |
| 2010 | 1 | 1 | 0 | 0 | 0 | 1 |
| 2011 | 1 | 1 | 0 | 0 | 1 | 1 |
| 2012 | 1 | 0 | 0 | 0 | 0 | 0 |
| 2013 | 1 | 1 | 0 | 0 | 0 | 1 |
| 2014 | 0 | 0 | 1 | 1 | 1 | 1 |
| 2015 | 1 | 1 | 1 | 1 | 1 | 1 |
| 2016 | 1 | 1 | 1 | 1 | 1 | 1 |
| 2017 | 1 | 1 | 1 | 1 | 1 | 1 |
| 2018 | 1 | 1 | 1 | 1 | 1 | 1 |
| 2019 | 1 | 1 | 1 | 1 | 1 | 1 |
| 2020 | 1 | 1 | 1 | 0 | 1 | 1 |

| Serio - Brembo       |        |        |        |        |        |        |
|----------------------|--------|--------|--------|--------|--------|--------|
| HS – 1500-2000 m asl |        |        |        |        |        |        |
| Date                 | 01-feb | 01-mar | 01-apr | 15-apr | 01-mag | 01-giu |
| 1967                 | 15     | 15     | 15     | 15     | 15     | 15     |
| 1968                 | 15     | 15     | 15     | 15     | 15     | 15     |
| 1969                 | 15     | 15     | 15     | 15     | 15     | 14     |
| 1970                 | 15     | 15     | 15     | 15     | 15     | 15     |
| 1971                 | 15     | 15     | 15     | 15     | 14     | 15     |
| 1972                 | 14     | 15     | 15     | 15     | 15     | 15     |
| 1973                 | 14     | 15     | 15     | 15     | 15     | 15     |
| 1974                 | 14     | 14     | 15     | 15     | 15     | 15     |
| 1975                 | 15     | 14     | 13     | 13     | 15     | 15     |
| 1976                 | 13     | 14     | 14     | 13     | 15     | 10     |
| 1977                 | 14     | 14     | 14     | 14     | 15     | 15     |
| 1978                 | 15     | 8      | 14     | 14     | 15     | 15     |
| 1979                 | 15     | 13     | 13     | 13     | 13     | 15     |
| 1980                 | 14     | 14     | 14     | 14     | 14     | 15     |
| 1981                 | 14     | 14     | 14     | 10     | 15     | 14     |
| 1982                 | 14     | 14     | 14     | 14     | 13     | 14     |
| 1983                 | 15     | 14     | 14     | 14     | 15     | 15     |
| 1984                 | 14     | 14     | 14     | 14     | 15     | 15     |
| 1985                 | 13     | 13     | 13     | 13     | 14     | 14     |
| 1986                 | 9      | 13     | 13     | 13     | 12     | 14     |
| 1987                 | 13     | 12     | 13     | 12     | 13     | 14     |
| 1988                 | 10     | 13     | 8      | 9      | 12     | 14     |
| 1989                 | 11     | 12     | 13     | 13     | 14     | 14     |
| 1990                 | 13     | 13     | 12     | 13     | 13     | 6      |
| 1991                 | 13     | 13     | 13     | 13     | 14     | 11     |
| 1992                 | 14     | 13     | 12     | 13     | 13     | 14     |
| 1993                 | 13     | 13     | 13     | 13     | 12     | 14     |
| 1994                 | 13     | 11     | 13     | 13     | 12     | 14     |
| 1995                 | 13     | 13     | 13     | 12     | 13     | 14     |

|      |    |    |    |    |    |    |
|------|----|----|----|----|----|----|
| 1996 | 13 | 13 | 13 | 13 | 14 | 14 |
| 1997 | 13 | 13 | 13 | 11 | 10 | 14 |
| 1998 | 13 | 13 | 13 | 12 | 14 | 14 |
| 1999 | 13 | 13 | 13 | 13 | 13 | 14 |
| 2000 | 5  | 13 | 13 | 5  | 4  | 6  |
| 2001 | 13 | 13 | 13 | 5  | 13 | 14 |
| 2002 | 11 | 13 | 13 | 13 | 10 | 12 |
| 2003 | 13 | 13 | 12 | 12 | 10 | 12 |
| 2004 | 13 | 14 | 13 | 13 | 13 | 10 |
| 2005 | 13 | 14 | 13 | 14 | 13 | 6  |
| 2006 | 6  | 15 | 14 | 14 | 15 | 11 |
| 2007 | 15 | 15 | 14 | 9  | 12 | 15 |
| 2008 | 12 | 14 | 13 | 12 | 13 | 14 |
| 2009 | 12 | 13 | 14 | 14 | 14 | 14 |
| 2010 | 15 | 13 | 12 | 12 | 13 | 14 |
| 2011 | 13 | 15 | 15 | 15 | 14 | 16 |
| 2012 | 14 | 14 | 15 | 13 | 15 | 16 |
| 2013 | 13 | 14 | 14 | 15 | 15 | 15 |
| 2014 | 9  | 11 | 12 | 13 | 15 | 15 |
| 2015 | 14 | 14 | 12 | 13 | 15 | 16 |
| 2016 | 13 | 13 | 13 | 12 | 13 | 14 |
| 2017 | 9  | 11 | 10 | 10 | 10 | 14 |
| 2018 | 11 | 12 | 12 | 12 | 13 | 13 |
| 2019 | 13 | 13 | 12 | 13 | 13 | 13 |
| 2020 | 13 | 14 | 12 | 13 | 13 | 14 |

| Serio - Brembo       |        |        |        |        |        |        |
|----------------------|--------|--------|--------|--------|--------|--------|
| HS – 2000-2500 m asl |        |        |        |        |        |        |
| Date                 | 01-feb | 01-mar | 01-apr | 15-apr | 01-mag | 01-giu |
| 1967                 | 5      | 5      | 5      | 5      | 5      | 5      |
| 1968                 | 5      | 5      | 5      | 5      | 5      | 5      |
| 1969                 | 5      | 5      | 5      | 5      | 5      | 5      |
| 1970                 | 3      | 3      | 2      | 3      | 5      | 5      |
| 1971                 | 2      | 3      | 3      | 3      | 5      | 5      |
| 1972                 | 4      | 4      | 5      | 5      | 5      | 5      |
| 1973                 | 4      | 4      | 4      | 4      | 5      | 5      |
| 1974                 | 4      | 4      | 4      | 4      | 4      | 5      |
| 1975                 | 4      | 4      | 3      | 2      | 5      | 5      |
| 1976                 | 3      | 4      | 4      | 4      | 3      | 4      |
| 1977                 | 4      | 4      | 4      | 4      | 4      | 5      |
| 1978                 | 4      | 2      | 4      | 4      | 4      | 5      |
| 1979                 | 4      | 4      | 4      | 4      | 4      | 5      |
| 1980                 | 5      | 4      | 4      | 4      | 5      | 5      |
| 1981                 | 4      | 4      | 4      | 4      | 5      | 5      |
| 1982                 | 4      | 4      | 4      | 4      | 4      | 5      |
| 1983                 | 4      | 4      | 4      | 4      | 5      | 5      |
| 1984                 | 3      | 3      | 3      | 3      | 5      | 5      |
| 1985                 | 4      | 3      | 3      | 3      | 5      | 5      |
| 1986                 | 3      | 3      | 4      | 3      | 4      | 5      |
| 1987                 | 3      | 3      | 3      | 3      | 5      | 5      |
| 1988                 | 1      | 3      | 2      | 0      | 4      | 5      |
| 1989                 | 3      | 3      | 3      | 3      | 5      | 5      |
| 1990                 | 3      | 3      | 3      | 3      | 4      | 2      |
| 1991                 | 3      | 3      | 3      | 3      | 4      | 3      |
| 1992                 | 4      | 4      | 3      | 3      | 4      | 5      |
| 1993                 | 3      | 3      | 3      | 3      | 4      | 5      |
| 1994                 | 3      | 3      | 3      | 3      | 3      | 5      |
| 1995                 | 4      | 3      | 3      | 3      | 3      | 5      |

|      |   |   |   |   |   |   |
|------|---|---|---|---|---|---|
| 1996 | 4 | 3 | 3 | 3 | 3 | 5 |
| 1997 | 3 | 3 | 3 | 3 | 3 | 5 |
| 1998 | 4 | 3 | 3 | 3 | 3 | 5 |
| 1999 | 3 | 3 | 3 | 3 | 3 | 5 |
| 2000 | 0 | 3 | 3 | 0 | 0 | 2 |
| 2001 | 3 | 3 | 3 | 0 | 3 | 5 |
| 2002 | 2 | 3 | 3 | 3 | 3 | 4 |
| 2003 | 3 | 3 | 3 | 3 | 4 | 4 |
| 2004 | 3 | 3 | 3 | 3 | 3 | 5 |
| 2005 | 4 | 4 | 4 | 4 | 5 | 2 |
| 2006 | 2 | 5 | 5 | 5 | 5 | 4 |
| 2007 | 5 | 5 | 4 | 4 | 4 | 5 |
| 2008 | 3 | 5 | 4 | 3 | 2 | 3 |
| 2009 | 3 | 3 | 4 | 4 | 4 | 3 |
| 2010 | 4 | 4 | 4 | 3 | 3 | 4 |
| 2011 | 5 | 5 | 5 | 5 | 5 | 5 |
| 2012 | 7 | 7 | 7 | 7 | 7 | 7 |
| 2013 | 6 | 7 | 7 | 7 | 7 | 7 |
| 2014 | 3 | 2 | 4 | 6 | 7 | 7 |
| 2015 | 7 | 7 | 7 | 7 | 7 | 8 |
| 2016 | 7 | 7 | 7 | 7 | 7 | 6 |
| 2017 | 4 | 5 | 6 | 6 | 4 | 7 |
| 2018 | 7 | 7 | 7 | 5 | 7 | 8 |
| 2019 | 5 | 7 | 7 | 5 | 7 | 7 |
| 2020 | 7 | 7 | 7 | 4 | 6 | 8 |



| Serio - Brembo       |        |        |        |        |        |        |
|----------------------|--------|--------|--------|--------|--------|--------|
| HS – 2500-3000 m asl |        |        |        |        |        |        |
| Date                 | 01-feb | 01-mar | 01-apr | 15-apr | 01-mag | 01-giu |
| 1967                 | 0      | 0      | 0      | 0      | 0      | 0      |
| 1968                 | 0      | 0      | 0      | 0      | 0      | 0      |
| 1969                 | 0      | 0      | 0      | 0      | 0      | 0      |
| 1970                 | 0      | 0      | 0      | 0      | 0      | 0      |
| 1971                 | 0      | 0      | 0      | 0      | 0      | 0      |
| 1972                 | 0      | 0      | 0      | 0      | 0      | 0      |
| 1973                 | 0      | 0      | 0      | 0      | 0      | 0      |
| 1974                 | 0      | 0      | 0      | 0      | 0      | 0      |
| 1975                 | 0      | 0      | 0      | 0      | 0      | 0      |
| 1976                 | 0      | 0      | 0      | 0      | 0      | 0      |
| 1977                 | 0      | 0      | 0      | 0      | 0      | 0      |
| 1978                 | 0      | 0      | 0      | 0      | 0      | 0      |
| 1979                 | 0      | 0      | 0      | 0      | 0      | 0      |
| 1980                 | 0      | 0      | 0      | 0      | 0      | 0      |
| 1981                 | 0      | 0      | 0      | 0      | 0      | 0      |
| 1982                 | 0      | 0      | 0      | 0      | 0      | 0      |
| 1983                 | 0      | 0      | 0      | 0      | 0      | 0      |
| 1984                 | 0      | 0      | 0      | 0      | 0      | 0      |
| 1985                 | 0      | 0      | 0      | 0      | 0      | 0      |
| 1986                 | 0      | 0      | 0      | 0      | 0      | 0      |
| 1987                 | 0      | 0      | 0      | 0      | 0      | 0      |
| 1988                 | 0      | 0      | 0      | 0      | 0      | 0      |
| 1989                 | 0      | 0      | 0      | 0      | 0      | 0      |
| 1990                 | 0      | 0      | 0      | 0      | 0      | 0      |
| 1991                 | 0      | 0      | 0      | 0      | 0      | 0      |
| 1992                 | 0      | 0      | 0      | 0      | 0      | 0      |
| 1993                 | 0      | 0      | 0      | 0      | 0      | 0      |
| 1994                 | 0      | 0      | 0      | 0      | 0      | 0      |
| 1995                 | 0      | 0      | 0      | 0      | 0      | 0      |

|      |   |   |   |   |   |   |
|------|---|---|---|---|---|---|
| 1996 | 0 | 0 | 0 | 0 | 0 | 0 |
| 1997 | 0 | 0 | 0 | 0 | 0 | 0 |
| 1998 | 0 | 0 | 0 | 0 | 0 | 0 |
| 1999 | 0 | 0 | 0 | 0 | 0 | 0 |
| 2000 | 0 | 0 | 0 | 0 | 0 | 0 |
| 2001 | 0 | 0 | 0 | 0 | 0 | 0 |
| 2002 | 0 | 0 | 0 | 0 | 0 | 0 |
| 2003 | 0 | 0 | 0 | 0 | 0 | 0 |
| 2004 | 0 | 0 | 0 | 0 | 0 | 0 |
| 2005 | 0 | 0 | 0 | 0 | 0 | 0 |
| 2006 | 0 | 0 | 0 | 0 | 0 | 0 |
| 2007 | 0 | 0 | 0 | 0 | 0 | 0 |
| 2008 | 0 | 0 | 0 | 0 | 0 | 0 |
| 2009 | 0 | 0 | 0 | 0 | 0 | 0 |
| 2010 | 0 | 0 | 0 | 0 | 0 | 0 |
| 2011 | 0 | 0 | 0 | 0 | 0 | 0 |
| 2012 | 1 | 1 | 0 | 1 | 1 | 1 |
| 2013 | 1 | 1 | 0 | 0 | 0 | 1 |
| 2014 | 0 | 0 | 0 | 0 | 0 | 0 |
| 2015 | 0 | 0 | 0 | 0 | 0 | 0 |
| 2016 | 0 | 0 | 0 | 0 | 0 | 0 |
| 2017 | 0 | 0 | 0 | 0 | 0 | 0 |
| 2018 | 0 | 0 | 0 | 0 | 0 | 0 |
| 2019 | 0 | 0 | 0 | 0 | 0 | 0 |
| 2020 | 0 | 0 | 0 | 0 | 0 | 0 |

| Adda                 |        |        |        |        |        |        |
|----------------------|--------|--------|--------|--------|--------|--------|
| HS – 1000-1500 m asl |        |        |        |        |        |        |
| Date                 | 01-feb | 01-mar | 01-apr | 15-apr | 01-mag | 01-giu |
| 1967                 | 0      | 0      | 0      | 0      | 0      | 0      |
| 1968                 | 0      | 0      | 0      | 0      | 0      | 0      |
| 1969                 | 0      | 0      | 0      | 0      | 0      | 0      |
| 1970                 | 0      | 0      | 0      | 0      | 0      | 0      |
| 1971                 | 0      | 0      | 0      | 0      | 0      | 0      |
| 1972                 | 0      | 0      | 0      | 0      | 0      | 0      |
| 1973                 | 0      | 0      | 0      | 0      | 0      | 0      |
| 1974                 | 0      | 0      | 0      | 0      | 0      | 0      |
| 1975                 | 0      | 0      | 0      | 0      | 0      | 0      |
| 1976                 | 0      | 0      | 0      | 0      | 0      | 0      |
| 1977                 | 0      | 0      | 0      | 0      | 0      | 0      |
| 1978                 | 0      | 0      | 0      | 0      | 0      | 0      |
| 1979                 | 0      | 0      | 0      | 0      | 0      | 0      |
| 1980                 | 0      | 0      | 0      | 0      | 0      | 0      |
| 1981                 | 0      | 0      | 0      | 0      | 0      | 0      |
| 1982                 | 0      | 0      | 0      | 0      | 0      | 0      |
| 1983                 | 0      | 0      | 0      | 0      | 0      | 0      |
| 1984                 | 0      | 0      | 0      | 0      | 0      | 0      |
| 1985                 | 0      | 0      | 0      | 0      | 0      | 0      |
| 1986                 | 0      | 0      | 0      | 0      | 0      | 0      |
| 1987                 | 0      | 0      | 0      | 0      | 0      | 0      |
| 1988                 | 0      | 0      | 0      | 0      | 0      | 0      |
| 1989                 | 0      | 0      | 0      | 0      | 0      | 0      |
| 1990                 | 0      | 0      | 0      | 0      | 0      | 0      |
| 1991                 | 0      | 0      | 0      | 0      | 0      | 0      |
| 1992                 | 0      | 0      | 0      | 0      | 0      | 0      |
| 1993                 | 0      | 0      | 0      | 0      | 0      | 0      |
| 1994                 | 0      | 0      | 0      | 0      | 0      | 0      |
| 1995                 | 0      | 0      | 0      | 0      | 0      | 0      |

|      |   |   |   |   |   |   |
|------|---|---|---|---|---|---|
| 1996 | 0 | 0 | 0 | 0 | 0 | 0 |
| 1997 | 0 | 0 | 0 | 0 | 0 | 0 |
| 1998 | 0 | 0 | 0 | 0 | 0 | 0 |
| 1999 | 0 | 0 | 0 | 0 | 0 | 0 |
| 2000 | 0 | 0 | 0 | 0 | 0 | 0 |
| 2001 | 0 | 0 | 0 | 0 | 0 | 0 |
| 2002 | 0 | 0 | 0 | 0 | 0 | 0 |
| 2003 | 0 | 0 | 0 | 0 | 0 | 0 |
| 2004 | 0 | 0 | 0 | 0 | 0 | 0 |
| 2005 | 0 | 0 | 0 | 0 | 0 | 0 |
| 2006 | 0 | 0 | 0 | 0 | 0 | 0 |
| 2007 | 0 | 0 | 0 | 0 | 0 | 0 |
| 2008 | 0 | 0 | 0 | 0 | 0 | 0 |
| 2009 | 0 | 0 | 0 | 0 | 0 | 0 |
| 2010 | 0 | 0 | 0 | 0 | 0 | 0 |
| 2011 | 0 | 0 | 0 | 0 | 0 | 0 |
| 2012 | 0 | 0 | 0 | 0 | 0 | 0 |
| 2013 | 0 | 0 | 0 | 0 | 0 | 0 |
| 2014 | 0 | 0 | 0 | 0 | 0 | 0 |
| 2015 | 0 | 0 | 0 | 0 | 0 | 0 |
| 2016 | 0 | 0 | 0 | 0 | 0 | 0 |
| 2017 | 0 | 0 | 0 | 0 | 0 | 0 |
| 2018 | 0 | 0 | 0 | 0 | 0 | 0 |
| 2019 | 0 | 0 | 0 | 0 | 0 | 0 |
| 2020 | 0 | 0 | 0 | 0 | 0 | 0 |

| Adda                 |        |        |        |        |        |        |
|----------------------|--------|--------|--------|--------|--------|--------|
| HS – 1500-2000 m asl |        |        |        |        |        |        |
| Date                 | 01-feb | 01-mar | 01-apr | 15-apr | 01-mag | 01-giu |
| 1967                 | 7      | 7      | 8      | 8      | 8      | 9      |
| 1968                 | 8      | 7      | 7      | 7      | 7      | 9      |
| 1969                 | 7      | 7      | 8      | 8      | 8      | 3      |
| 1970                 | 8      | 8      | 7      | 8      | 9      | 9      |
| 1971                 | 7      | 8      | 8      | 8      | 6      | 7      |
| 1972                 | 7      | 7      | 7      | 7      | 7      | 8      |
| 1973                 | 7      | 8      | 8      | 8      | 7      | 7      |
| 1974                 | 7      | 6      | 9      | 8      | 7      | 7      |
| 1975                 | 8      | 8      | 7      | 6      | 7      | 8      |
| 1976                 | 6      | 9      | 8      | 8      | 8      | 4      |
| 1977                 | 8      | 5      | 7      | 7      | 7      | 8      |
| 1978                 | 5      | 6      | 7      | 7      | 6      | 8      |
| 1979                 | 8      | 7      | 7      | 7      | 7      | 9      |
| 1980                 | 7      | 8      | 7      | 8      | 8      | 9      |
| 1981                 | 8      | 8      | 8      | 6      | 8      | 5      |
| 1982                 | 9      | 9      | 8      | 8      | 4      | 5      |
| 1983                 | 7      | 8      | 8      | 8      | 8      | 9      |
| 1984                 | 8      | 8      | 8      | 8      | 8      | 9      |
| 1985                 | 2      | 2      | 3      | 3      | 2      | 3      |
| 1986                 | 2      | 2      | 2      | 2      | 2      | 3      |
| 1987                 | 2      | 2      | 2      | 2      | 2      | 3      |
| 1988                 | 3      | 2      | 2      | 2      | 2      | 3      |
| 1989                 | 2      | 3      | 2      | 2      | 2      | 3      |
| 1990                 | 2      | 2      | 2      | 2      | 2      | 3      |
| 1991                 | 3      | 3      | 2      | 3      | 2      | 3      |
| 1992                 | 2      | 2      | 2      | 3      | 2      | 3      |
| 1993                 | 2      | 2      | 2      | 3      | 0      | 3      |
| 1994                 | 2      | 2      | 3      | 2      | 2      | 3      |
| 1995                 | 3      | 3      | 2      | 2      | 2      | 3      |

|      |   |   |   |   |   |    |
|------|---|---|---|---|---|----|
| 1996 | 3 | 2 | 2 | 2 | 1 | 3  |
| 1997 | 2 | 2 | 2 | 0 | 0 | 3  |
| 1998 | 2 | 2 | 2 | 2 | 2 | 3  |
| 1999 | 2 | 2 | 2 | 2 | 2 | 3  |
| 2000 | 2 | 2 | 2 | 2 | 2 | 3  |
| 2001 | 2 | 2 | 2 | 2 | 2 | 3  |
| 2002 | 2 | 2 | 2 | 2 | 2 | 3  |
| 2003 | 2 | 2 | 2 | 2 | 2 | 3  |
| 2004 | 2 | 2 | 2 | 2 | 2 | 3  |
| 2005 | 2 | 2 | 2 | 8 | 3 | 3  |
| 2006 | 2 | 2 | 2 | 2 | 2 | 3  |
| 2007 | 8 | 8 | 8 | 6 | 6 | 7  |
| 2008 | 2 | 0 | 0 | 0 | 0 | 0  |
| 2009 | 3 | 6 | 6 | 6 | 6 | 6  |
| 2010 | 9 | 8 | 4 | 8 | 7 | 8  |
| 2011 | 8 | 8 | 8 | 8 | 8 | 8  |
| 2012 | 6 | 6 | 9 | 9 | 8 | 9  |
| 2013 | 6 | 6 | 6 | 6 | 2 | 6  |
| 2014 | 4 | 8 | 8 | 6 | 4 | 9  |
| 2015 | 6 | 6 | 6 | 6 | 7 | 10 |
| 2016 | 6 | 4 | 6 | 7 | 5 | 5  |
| 2017 | 5 | 6 | 6 | 7 | 5 | 6  |
| 2018 | 8 | 8 | 6 | 8 | 6 | 9  |
| 2019 | 9 | 8 | 8 | 8 | 8 | 9  |
| 2020 | 9 | 4 | 6 | 7 | 6 | 9  |

| Adda                 |        |        |        |        |        |        |
|----------------------|--------|--------|--------|--------|--------|--------|
| HS – 2000-2500 m asl |        |        |        |        |        |        |
| Date                 | 01-feb | 01-mar | 01-apr | 15-apr | 01-mag | 01-giu |
| 1967                 | 6      | 6      | 6      | 6      | 6      | 7      |
| 1968                 | 6      | 6      | 6      | 6      | 6      | 7      |
| 1969                 | 6      | 6      | 6      | 6      | 6      | 2      |
| 1970                 | 6      | 4      | 6      | 6      | 6      | 7      |
| 1971                 | 7      | 7      | 6      | 6      | 6      | 5      |
| 1972                 | 11     | 11     | 11     | 11     | 11     | 11     |
| 1973                 | 11     | 11     | 11     | 11     | 11     | 5      |
| 1974                 | 10     | 11     | 11     | 11     | 11     | 5      |
| 1975                 | 11     | 11     | 11     | 10     | 11     | 11     |
| 1976                 | 11     | 11     | 11     | 11     | 11     | 5      |
| 1977                 | 11     | 6      | 11     | 11     | 11     | 11     |
| 1978                 | 5      | 11     | 11     | 11     | 11     | 11     |
| 1979                 | 11     | 11     | 11     | 11     | 11     | 11     |
| 1980                 | 11     | 11     | 11     | 11     | 11     | 11     |
| 1981                 | 11     | 11     | 11     | 10     | 11     | 8      |
| 1982                 | 11     | 11     | 11     | 11     | 10     | 8      |
| 1983                 | 11     | 11     | 11     | 11     | 11     | 11     |
| 1984                 | 11     | 11     | 11     | 11     | 11     | 11     |
| 1985                 | 2      | 2      | 2      | 2      | 2      | 2      |
| 1986                 | 1      | 1      | 1      | 1      | 2      | 2      |
| 1987                 | 1      | 1      | 1      | 1      | 1      | 2      |
| 1988                 | 1      | 1      | 1      | 2      | 1      | 2      |
| 1989                 | 1      | 2      | 1      | 1      | 2      | 2      |
| 1990                 | 1      | 1      | 1      | 1      | 1      | 2      |
| 1991                 | 2      | 2      | 1      | 2      | 1      | 2      |
| 1992                 | 1      | 1      | 1      | 2      | 1      | 2      |
| 1993                 | 1      | 1      | 1      | 2      | 0      | 2      |
| 1994                 | 1      | 1      | 1      | 1      | 1      | 2      |
| 1995                 | 2      | 2      | 1      | 1      | 1      | 2      |

|      |    |    |    |    |    |    |
|------|----|----|----|----|----|----|
| 1996 | 2  | 1  | 1  | 1  | 1  | 2  |
| 1997 | 1  | 1  | 1  | 1  | 1  | 2  |
| 1998 | 1  | 1  | 1  | 1  | 1  | 2  |
| 1999 | 1  | 1  | 0  | 0  | 1  | 2  |
| 2000 | 1  | 1  | 1  | 1  | 1  | 2  |
| 2001 | 2  | 1  | 1  | 1  | 1  | 2  |
| 2002 | 1  | 1  | 1  | 1  | 1  | 2  |
| 2003 | 1  | 1  | 1  | 1  | 1  | 2  |
| 2004 | 1  | 1  | 1  | 1  | 1  | 2  |
| 2005 | 1  | 1  | 1  | 10 | 1  | 2  |
| 2006 | 1  | 1  | 1  | 1  | 1  | 2  |
| 2007 | 10 | 10 | 10 | 4  | 4  | 5  |
| 2008 | 1  | 0  | 0  | 0  | 0  | 0  |
| 2009 | 6  | 9  | 9  | 9  | 9  | 9  |
| 2010 | 12 | 11 | 9  | 10 | 10 | 10 |
| 2011 | 10 | 10 | 10 | 10 | 10 | 10 |
| 2012 | 11 | 11 | 13 | 12 | 13 | 13 |
| 2013 | 11 | 10 | 10 | 9  | 4  | 9  |
| 2014 | 3  | 13 | 14 | 12 | 8  | 14 |
| 2015 | 13 | 14 | 13 | 13 | 14 | 14 |
| 2016 | 13 | 6  | 13 | 6  | 6  | 3  |
| 2017 | 6  | 8  | 12 | 11 | 3  | 10 |
| 2018 | 14 | 12 | 11 | 10 | 11 | 14 |
| 2019 | 13 | 13 | 14 | 10 | 13 | 8  |
| 2020 | 14 | 3  | 8  | 7  | 5  | 13 |



| Adda                 |        |        |        |        |        |        |
|----------------------|--------|--------|--------|--------|--------|--------|
| HS – 2500-3000 m asl |        |        |        |        |        |        |
| Date                 | 01-feb | 01-mar | 01-apr | 15-apr | 01-mag | 01-giu |
| 1967                 | 0      | 0      | 0      | 0      | 0      | 0      |
| 1968                 | 0      | 0      | 0      | 0      | 0      | 0      |
| 1969                 | 0      | 0      | 0      | 0      | 0      | 0      |
| 1970                 | 0      | 0      | 0      | 0      | 0      | 0      |
| 1971                 | 0      | 0      | 0      | 0      | 0      | 0      |
| 1972                 | 0      | 0      | 0      | 0      | 0      | 0      |
| 1973                 | 0      | 0      | 0      | 0      | 0      | 0      |
| 1974                 | 0      | 0      | 0      | 0      | 0      | 0      |
| 1975                 | 0      | 0      | 0      | 0      | 0      | 0      |
| 1976                 | 0      | 0      | 0      | 0      | 0      | 0      |
| 1977                 | 0      | 0      | 0      | 0      | 0      | 0      |
| 1978                 | 0      | 0      | 0      | 0      | 0      | 0      |
| 1979                 | 0      | 0      | 0      | 0      | 0      | 0      |
| 1980                 | 0      | 0      | 0      | 0      | 0      | 0      |
| 1981                 | 0      | 0      | 0      | 0      | 0      | 0      |
| 1982                 | 0      | 0      | 0      | 0      | 0      | 0      |
| 1983                 | 0      | 0      | 0      | 0      | 0      | 0      |
| 1984                 | 0      | 0      | 0      | 0      | 0      | 0      |
| 1985                 | 0      | 0      | 0      | 0      | 0      | 0      |
| 1986                 | 0      | 0      | 0      | 0      | 0      | 0      |
| 1987                 | 0      | 0      | 0      | 0      | 0      | 0      |
| 1988                 | 0      | 0      | 0      | 0      | 0      | 0      |
| 1989                 | 0      | 0      | 0      | 0      | 0      | 0      |
| 1990                 | 0      | 0      | 0      | 0      | 0      | 0      |
| 1991                 | 0      | 0      | 0      | 0      | 0      | 0      |
| 1992                 | 0      | 0      | 0      | 0      | 0      | 0      |
| 1993                 | 0      | 0      | 0      | 0      | 0      | 0      |
| 1994                 | 0      | 0      | 0      | 0      | 0      | 0      |
| 1995                 | 0      | 0      | 0      | 0      | 0      | 0      |

|      |   |   |   |   |   |   |
|------|---|---|---|---|---|---|
| 1996 | 0 | 0 | 0 | 0 | 0 | 0 |
| 1997 | 0 | 0 | 0 | 0 | 0 | 0 |
| 1998 | 0 | 0 | 0 | 0 | 0 | 0 |
| 1999 | 0 | 0 | 0 | 0 | 0 | 0 |
| 2000 | 0 | 0 | 0 | 0 | 0 | 0 |
| 2001 | 0 | 0 | 0 | 0 | 0 | 0 |
| 2002 | 0 | 0 | 0 | 0 | 0 | 0 |
| 2003 | 0 | 0 | 0 | 0 | 0 | 0 |
| 2004 | 0 | 0 | 0 | 0 | 0 | 0 |
| 2005 | 0 | 0 | 0 | 0 | 0 | 0 |
| 2006 | 0 | 0 | 0 | 0 | 0 | 0 |
| 2007 | 0 | 0 | 0 | 0 | 0 | 0 |
| 2008 | 0 | 0 | 0 | 0 | 0 | 0 |
| 2009 | 0 | 0 | 0 | 0 | 0 | 0 |
| 2010 | 0 | 0 | 0 | 0 | 0 | 0 |
| 2011 | 0 | 0 | 0 | 0 | 0 | 0 |
| 2012 | 0 | 1 | 1 | 1 | 1 | 1 |
| 2013 | 1 | 0 | 0 | 0 | 0 | 0 |
| 2014 | 1 | 1 | 1 | 1 | 1 | 1 |
| 2015 | 1 | 2 | 2 | 2 | 1 | 2 |
| 2016 | 2 | 1 | 2 | 1 | 1 | 1 |
| 2017 | 1 | 1 | 1 | 1 | 1 | 1 |
| 2018 | 1 | 1 | 1 | 1 | 1 | 1 |
| 2019 | 1 | 1 | 1 | 1 | 1 | 1 |
| 2020 | 1 | 1 | 1 | 1 | 1 | 1 |

| Toce                 |        |        |        |        |        |        |
|----------------------|--------|--------|--------|--------|--------|--------|
| HS – 1000-1500 m asl |        |        |        |        |        |        |
| Date                 | 01-feb | 01-mar | 01-apr | 15-apr | 01-mag | 01-giu |
| 1967                 | 0      | 0      | 0      | 0      | 0      | 2      |
| 1968                 | 0      | 0      | 0      | 0      | 0      | 2      |
| 1969                 | 0      | 0      | 0      | 0      | 0      | 2      |
| 1970                 | 0      | 0      | 0      | 0      | 0      | 2      |
| 1971                 | 0      | 0      | 0      | 0      | 0      | 2      |
| 1972                 | 0      | 0      | 0      | 0      | 0      | 2      |
| 1973                 | 0      | 0      | 0      | 0      | 0      | 2      |
| 1974                 | 0      | 0      | 0      | 0      | 0      | 2      |
| 1975                 | 0      | 0      | 0      | 0      | 0      | 2      |
| 1976                 | 0      | 0      | 0      | 0      | 0      | 2      |
| 1977                 | 0      | 0      | 0      | 0      | 0      | 2      |
| 1978                 | 0      | 0      | 0      | 0      | 0      | 2      |
| 1979                 | 0      | 0      | 0      | 0      | 0      | 2      |
| 1980                 | 1      | 1      | 1      | 1      | 1      | 2      |
| 1981                 | 1      | 1      | 1      | 1      | 1      | 2      |
| 1982                 | 1      | 1      | 1      | 1      | 1      | 2      |
| 1983                 | 1      | 1      | 1      | 1      | 1      | 2      |
| 1984                 | 1      | 1      | 1      | 1      | 1      | 2      |
| 1985                 | 1      | 1      | 1      | 1      | 1      | 2      |
| 1986                 | 1      | 1      | 1      | 1      | 1      | 2      |
| 1987                 | 1      | 1      | 1      | 1      | 1      | 2      |
| 1988                 | 1      | 1      | 1      | 1      | 1      | 2      |
| 1989                 | 1      | 1      | 1      | 1      | 1      | 2      |
| 1990                 | 1      | 1      | 1      | 1      | 1      | 2      |
| 1991                 | 1      | 1      | 1      | 1      | 1      | 2      |
| 1992                 | 1      | 1      | 1      | 1      | 1      | 2      |
| 1993                 | 1      | 1      | 1      | 1      | 1      | 2      |
| 1994                 | 1      | 1      | 1      | 1      | 1      | 2      |
| 1995                 | 1      | 1      | 1      | 1      | 1      | 2      |

|      |   |   |   |   |   |   |
|------|---|---|---|---|---|---|
| 1996 | 1 | 1 | 1 | 1 | 1 | 2 |
| 1997 | 1 | 1 | 1 | 1 | 1 | 2 |
| 1998 | 1 | 1 | 1 | 1 | 1 | 2 |
| 1999 | 1 | 1 | 1 | 1 | 1 | 2 |
| 2000 | 1 | 2 | 2 | 2 | 2 | 3 |
| 2001 | 2 | 3 | 2 | 2 | 2 | 3 |
| 2002 | 2 | 2 | 2 | 2 | 2 | 3 |
| 2003 | 1 | 2 | 2 | 2 | 2 | 3 |
| 2004 | 1 | 2 | 2 | 2 | 2 | 3 |
| 2005 | 1 | 2 | 2 | 2 | 2 | 3 |
| 2006 | 1 | 2 | 2 | 2 | 2 | 3 |
| 2007 | 2 | 2 | 2 | 2 | 2 | 3 |
| 2008 | 2 | 3 | 2 | 2 | 1 | 2 |
| 2009 | 2 | 3 | 2 | 2 | 1 | 1 |
| 2010 | 3 | 2 | 2 | 2 | 1 | 1 |
| 2011 | 3 | 3 | 3 | 3 | 3 | 3 |
| 2012 | 3 | 3 | 3 | 3 | 3 | 3 |
| 2013 | 3 | 3 | 3 | 3 | 3 | 3 |
| 2014 | 3 | 3 | 3 | 3 | 3 | 3 |
| 2015 | 2 | 2 | 2 | 2 | 2 | 2 |
| 2016 | 2 | 2 | 2 | 2 | 2 | 2 |
| 2017 | 2 | 2 | 2 | 2 | 2 | 2 |
| 2018 | 2 | 2 | 1 | 2 | 2 | 2 |
| 2019 | 2 | 1 | 2 | 2 | 2 | 1 |
| 2020 | 2 | 2 | 2 | 2 | 2 | 3 |

| Toce                 |        |        |        |        |        |        |
|----------------------|--------|--------|--------|--------|--------|--------|
| HS – 1500-2000 m asl |        |        |        |        |        |        |
| Date                 | 01-feb | 01-mar | 01-apr | 15-apr | 01-mag | 01-giu |
| 1967                 | 1      | 1      | 1      | 1      | 1      | 3      |
| 1968                 | 1      | 1      | 1      | 1      | 1      | 3      |
| 1969                 | 3      | 6      | 6      | 6      | 6      | 6      |
| 1970                 | 8      | 8      | 7      | 4      | 7      | 7      |
| 1971                 | 8      | 8      | 8      | 4      | 7      | 8      |
| 1972                 | 8      | 4      | 8      | 8      | 8      | 9      |
| 1973                 | 8      | 8      | 8      | 8      | 8      | 8      |
| 1974                 | 8      | 8      | 8      | 8      | 8      | 9      |
| 1975                 | 8      | 8      | 8      | 3      | 4      | 5      |
| 1976                 | 8      | 3      | 8      | 3      | 3      | 4      |
| 1977                 | 4      | 4      | 4      | 4      | 4      | 4      |
| 1978                 | 8      | 8      | 8      | 8      | 8      | 9      |
| 1979                 | 8      | 8      | 8      | 8      | 8      | 9      |
| 1980                 | 9      | 9      | 9      | 9      | 9      | 9      |
| 1981                 | 9      | 9      | 9      | 9      | 9      | 9      |
| 1982                 | 9      | 9      | 9      | 9      | 9      | 9      |
| 1983                 | 9      | 9      | 9      | 9      | 9      | 9      |
| 1984                 | 9      | 9      | 9      | 9      | 9      | 9      |
| 1985                 | 9      | 8      | 8      | 8      | 9      | 9      |
| 1986                 | 4      | 4      | 4      | 4      | 4      | 4      |
| 1987                 | 4      | 4      | 4      | 4      | 4      | 4      |
| 1988                 | 4      | 4      | 4      | 4      | 4      | 4      |
| 1989                 | 4      | 4      | 4      | 4      | 4      | 4      |
| 1990                 | 4      | 4      | 4      | 4      | 4      | 4      |
| 1991                 | 4      | 4      | 4      | 4      | 4      | 4      |
| 1992                 | 4      | 4      | 4      | 4      | 4      | 4      |
| 1993                 | 4      | 4      | 4      | 4      | 4      | 4      |
| 1994                 | 4      | 4      | 4      | 4      | 4      | 4      |
| 1995                 | 4      | 4      | 4      | 4      | 4      | 4      |

|      |    |    |    |    |    |    |
|------|----|----|----|----|----|----|
| 1996 | 4  | 4  | 4  | 4  | 4  | 4  |
| 1997 | 4  | 4  | 4  | 4  | 4  | 4  |
| 1998 | 4  | 4  | 4  | 4  | 4  | 4  |
| 1999 | 4  | 4  | 4  | 4  | 4  | 4  |
| 2000 | 4  | 5  | 5  | 5  | 5  | 5  |
| 2001 | 4  | 5  | 5  | 5  | 5  | 5  |
| 2002 | 4  | 5  | 5  | 5  | 5  | 5  |
| 2003 | 4  | 5  | 5  | 5  | 5  | 5  |
| 2004 | 4  | 5  | 5  | 5  | 5  | 5  |
| 2005 | 4  | 5  | 5  | 5  | 5  | 5  |
| 2006 | 4  | 5  | 5  | 5  | 5  | 5  |
| 2007 | 12 | 12 | 11 | 10 | 12 | 12 |
| 2008 | 11 | 12 | 12 | 11 | 11 | 6  |
| 2009 | 10 | 11 | 11 | 12 | 12 | 9  |
| 2010 | 12 | 12 | 12 | 12 | 12 | 9  |
| 2011 | 12 | 12 | 12 | 6  | 9  | 6  |
| 2012 | 12 | 12 | 12 | 12 | 12 | 11 |
| 2013 | 12 | 12 | 12 | 12 | 12 | 12 |
| 2014 | 9  | 12 | 12 | 12 | 9  | 12 |
| 2015 | 12 | 12 | 12 | 12 | 10 | 12 |
| 2016 | 12 | 12 | 10 | 12 | 12 | 10 |
| 2017 | 10 | 12 | 12 | 10 | 12 | 12 |
| 2018 | 10 | 12 | 12 | 9  | 12 | 11 |
| 2019 | 11 | 11 | 11 | 12 | 11 | 11 |
| 2020 | 10 | 9  | 10 | 9  | 9  | 10 |

| Toce                 |        |        |        |        |        |        |
|----------------------|--------|--------|--------|--------|--------|--------|
| HS – 2000-2500 m asl |        |        |        |        |        |        |
| Date                 | 01-feb | 01-mar | 01-apr | 15-apr | 01-mag | 01-giu |
| 1967                 | 0      | 0      | 0      | 0      | 0      | 0      |
| 1968                 | 0      | 0      | 0      | 0      | 0      | 0      |
| 1969                 | 12     | 15     | 16     | 16     | 16     | 16     |
| 1970                 | 19     | 17     | 17     | 5      | 17     | 17     |
| 1971                 | 19     | 17     | 19     | 3      | 19     | 18     |
| 1972                 | 19     | 5      | 19     | 19     | 19     | 19     |
| 1973                 | 19     | 19     | 19     | 15     | 19     | 19     |
| 1974                 | 19     | 19     | 19     | 19     | 19     | 19     |
| 1975                 | 19     | 19     | 19     | 3      | 15     | 15     |
| 1976                 | 19     | 3      | 19     | 3      | 3      | 3      |
| 1977                 | 12     | 12     | 12     | 12     | 12     | 12     |
| 1978                 | 18     | 18     | 18     | 18     | 18     | 18     |
| 1979                 | 18     | 18     | 18     | 18     | 18     | 19     |
| 1980                 | 21     | 21     | 21     | 21     | 21     | 21     |
| 1981                 | 21     | 21     | 21     | 21     | 21     | 21     |
| 1982                 | 19     | 21     | 21     | 21     | 21     | 21     |
| 1983                 | 21     | 21     | 21     | 21     | 21     | 21     |
| 1984                 | 21     | 21     | 21     | 21     | 21     | 21     |
| 1985                 | 21     | 21     | 21     | 21     | 21     | 21     |
| 1986                 | 5      | 5      | 5      | 5      | 6      | 5      |
| 1987                 | 5      | 5      | 5      | 5      | 5      | 4      |
| 1988                 | 5      | 5      | 5      | 5      | 5      | 5      |
| 1989                 | 6      | 6      | 6      | 6      | 6      | 6      |
| 1990                 | 5      | 5      | 5      | 5      | 5      | 4      |
| 1991                 | 5      | 5      | 5      | 5      | 5      | 5      |
| 1992                 | 5      | 5      | 5      | 5      | 5      | 5      |
| 1993                 | 5      | 5      | 5      | 5      | 5      | 5      |
| 1994                 | 5      | 5      | 5      | 5      | 5      | 5      |
| 1995                 | 5      | 5      | 5      | 5      | 5      | 5      |

|      |    |    |    |    |    |    |
|------|----|----|----|----|----|----|
| 1996 | 5  | 5  | 5  | 5  | 5  | 5  |
| 1997 | 5  | 5  | 5  | 5  | 5  | 5  |
| 1998 | 5  | 5  | 5  | 5  | 5  | 5  |
| 1999 | 5  | 5  | 5  | 5  | 5  | 5  |
| 2000 | 5  | 5  | 5  | 5  | 5  | 5  |
| 2001 | 5  | 5  | 5  | 5  | 5  | 5  |
| 2002 | 5  | 5  | 5  | 5  | 4  | 5  |
| 2003 | 5  | 5  | 5  | 5  | 5  | 5  |
| 2004 | 5  | 5  | 5  | 5  | 5  | 5  |
| 2005 | 5  | 5  | 5  | 5  | 5  | 5  |
| 2006 | 5  | 5  | 5  | 5  | 5  | 5  |
| 2007 | 22 | 20 | 21 | 21 | 21 | 21 |
| 2008 | 17 | 21 | 18 | 18 | 21 | 6  |
| 2009 | 8  | 15 | 20 | 20 | 16 | 22 |
| 2010 | 22 | 22 | 20 | 21 | 22 | 21 |
| 2011 | 22 | 19 | 22 | 5  | 14 | 5  |
| 2012 | 21 | 22 | 22 | 20 | 21 | 22 |
| 2013 | 22 | 22 | 22 | 22 | 18 | 23 |
| 2014 | 10 | 15 | 22 | 22 | 18 | 23 |
| 2015 | 20 | 21 | 19 | 21 | 20 | 15 |
| 2016 | 20 | 14 | 19 | 20 | 22 | 19 |
| 2017 | 22 | 22 | 22 | 22 | 22 | 20 |
| 2018 | 15 | 21 | 22 | 16 | 21 | 23 |
| 2019 | 17 | 21 | 21 | 21 | 21 | 20 |
| 2020 | 18 | 8  | 19 | 20 | 18 | 14 |



| Toce                 |        |        |        |        |        |        |
|----------------------|--------|--------|--------|--------|--------|--------|
| HS – 2500-3000 m asl |        |        |        |        |        |        |
| Date                 | 01-feb | 01-mar | 01-apr | 15-apr | 01-mag | 01-giu |
| 1967                 | 0      | 0      | 0      | 0      | 0      | 0      |
| 1968                 | 0      | 0      | 0      | 0      | 0      | 0      |
| 1969                 | 0      | 0      | 0      | 0      | 0      | 0      |
| 1970                 | 0      | 0      | 0      | 0      | 0      | 0      |
| 1971                 | 0      | 0      | 0      | 0      | 0      | 0      |
| 1972                 | 0      | 0      | 0      | 0      | 0      | 0      |
| 1973                 | 0      | 0      | 0      | 0      | 0      | 0      |
| 1974                 | 0      | 0      | 0      | 0      | 0      | 0      |
| 1975                 | 0      | 0      | 0      | 0      | 0      | 0      |
| 1976                 | 0      | 0      | 0      | 0      | 0      | 0      |
| 1977                 | 0      | 0      | 0      | 0      | 0      | 0      |
| 1978                 | 0      | 0      | 0      | 0      | 0      | 0      |
| 1979                 | 0      | 0      | 0      | 0      | 0      | 0      |
| 1980                 | 0      | 0      | 0      | 0      | 0      | 0      |
| 1981                 | 0      | 0      | 0      | 0      | 0      | 0      |
| 1982                 | 0      | 0      | 0      | 0      | 0      | 0      |
| 1983                 | 0      | 0      | 0      | 0      | 0      | 0      |
| 1984                 | 0      | 0      | 0      | 0      | 0      | 0      |
| 1985                 | 0      | 0      | 0      | 0      | 0      | 0      |
| 1986                 | 0      | 0      | 0      | 0      | 0      | 0      |
| 1987                 | 0      | 0      | 0      | 0      | 0      | 0      |
| 1988                 | 0      | 0      | 0      | 0      | 0      | 0      |
| 1989                 | 0      | 0      | 0      | 0      | 0      | 0      |
| 1990                 | 0      | 0      | 0      | 0      | 0      | 0      |
| 1991                 | 0      | 0      | 0      | 0      | 0      | 0      |
| 1992                 | 0      | 0      | 0      | 0      | 0      | 0      |
| 1993                 | 0      | 0      | 0      | 0      | 0      | 0      |
| 1994                 | 0      | 0      | 0      | 0      | 0      | 0      |
| 1995                 | 0      | 0      | 0      | 0      | 0      | 0      |

|      |   |   |   |   |   |   |
|------|---|---|---|---|---|---|
| 1996 | 0 | 0 | 0 | 0 | 0 | 0 |
| 1997 | 0 | 0 | 0 | 0 | 0 | 0 |
| 1998 | 0 | 0 | 0 | 0 | 0 | 0 |
| 1999 | 0 | 0 | 0 | 0 | 0 | 0 |
| 2000 | 0 | 1 | 1 | 1 | 1 | 1 |
| 2001 | 0 | 1 | 1 | 1 | 1 | 1 |
| 2002 | 0 | 1 | 1 | 1 | 1 | 1 |
| 2003 | 0 | 1 | 1 | 1 | 1 | 1 |
| 2004 | 0 | 1 | 1 | 1 | 1 | 1 |
| 2005 | 0 | 1 | 1 | 1 | 1 | 1 |
| 2006 | 0 | 1 | 1 | 1 | 1 | 1 |
| 2007 | 1 | 1 | 1 | 1 | 1 | 1 |
| 2008 | 1 | 1 | 1 | 1 | 1 | 1 |
| 2009 | 1 | 1 | 1 | 1 | 1 | 1 |
| 2010 | 1 | 1 | 1 | 1 | 1 | 1 |
| 2011 | 1 | 1 | 1 | 1 | 1 | 1 |
| 2012 | 1 | 1 | 1 | 1 | 1 | 1 |
| 2013 | 1 | 1 | 1 | 1 | 1 | 1 |
| 2014 | 1 | 1 | 1 | 1 | 1 | 1 |
| 2015 | 1 | 1 | 1 | 1 | 1 | 1 |
| 2016 | 1 | 1 | 1 | 1 | 1 | 1 |
| 2017 | 1 | 1 | 1 | 1 | 1 | 1 |
| 2018 | 1 | 1 | 1 | 1 | 1 | 1 |
| 2019 | 1 | 1 | 1 | 1 | 1 | 1 |
| 2020 | 1 | 1 | 1 | 1 | 1 | 1 |

| Piave – Brenta             |        |        |        |        |        |        |
|----------------------------|--------|--------|--------|--------|--------|--------|
| $\rho_s - 1000-1500$ m asl |        |        |        |        |        |        |
| Date                       | 01-feb | 01-mar | 01-apr | 15-apr | 01-mag | 01-giu |
| 1967                       | 9      | 8      | 5      | 4      | 4      | 0      |
| 1968                       | 8      | 9      | 10     | 4      | 0      | 0      |
| 1969                       | 9      | 9      | 9      | 7      | 6      | 0      |
| 1970                       | 9      | 9      | 9      | 9      | 6      | 0      |
| 1971                       | 9      | 9      | 9      | 7      | 4      | 0      |
| 1972                       | 9      | 9      | 7      | 6      | 3      | 0      |
| 1973                       | 9      | 9      | 5      | 9      | 3      | 0      |
| 1974                       | 9      | 9      | 9      | 5      | 2      | 0      |
| 1975                       | 7      | 7      | 9      | 9      | 5      | 0      |
| 1976                       | 8      | 9      | 8      | 1      | 5      | 0      |
| 1977                       | 9      | 9      | 9      | 9      | 5      | 0      |
| 1978                       | 9      | 9      | 9      | 9      | 6      | 0      |
| 1979                       | 9      | 9      | 9      | 9      | 6      | 0      |
| 1980                       | 9      | 9      | 9      | 7      | 5      | 0      |
| 1981                       | 9      | 9      | 3      | 0      | 1      | 0      |
| 1982                       | 9      | 9      | 9      | 5      | 3      | 0      |
| 1983                       | 7      | 9      | 5      | 3      | 0      | 0      |
| 1984                       | 9      | 9      | 9      | 9      | 7      | 1      |
| 1985                       | 7      | 9      | 9      | 8      | 5      | 0      |
| 1986                       | 9      | 9      | 9      | 8      | 6      | 1      |
| 1987                       | 9      | 9      | 3      | 9      | 3      | 0      |
| 1988                       | 9      | 9      | 9      | 5      | 1      | 0      |
| 1989                       | 5      | 9      | 4      | 2      | 0      | 0      |
| 1990                       | 0      | 0      | 0      | 0      | 0      | 0      |
| 1991                       | 0      | 0      | 0      | 0      | 0      | 0      |
| 1992                       | 0      | 0      | 0      | 0      | 0      | 0      |
| 1993                       | 1      | 3      | 1      | 3      | 0      | 0      |
| 1994                       | 8      | 9      | 1      | 5      | 0      | 0      |
| 1995                       | 9      | 9      | 9      | 0      | 0      | 0      |

|      |    |    |    |    |    |   |
|------|----|----|----|----|----|---|
| 1996 | 9  | 9  | 6  | 3  | 0  | 0 |
| 1997 | 9  | 8  | 2  | 0  | 0  | 0 |
| 1998 | 9  | 9  | 2  | 8  | 1  | 0 |
| 1999 | 9  | 9  | 8  | 6  | 1  | 0 |
| 2000 | 6  | 5  | 6  | 1  | 0  | 0 |
| 2001 | 4  | 6  | 5  | 2  | 1  | 0 |
| 2002 | 1  | 6  | 0  | 0  | 0  | 0 |
| 2003 | 5  | 5  | 2  | 3  | 0  | 0 |
| 2004 | 6  | 6  | 6  | 5  | 1  | 0 |
| 2005 | 13 | 13 | 5  | 1  | 0  | 0 |
| 2006 | 12 | 12 | 12 | 7  | 3  | 0 |
| 2007 | 12 | 12 | 10 | 4  | 0  | 0 |
| 2008 | 12 | 12 | 9  | 6  | 3  | 0 |
| 2009 | 15 | 15 | 15 | 15 | 11 | 0 |
| 2010 | 15 | 12 | 14 | 9  | 2  | 0 |
| 2011 | 15 | 15 | 11 | 3  | 1  | 0 |
| 2012 | 15 | 15 | 1  | 2  | 0  | 0 |
| 2013 | 15 | 15 | 14 | 13 | 2  | 0 |
| 2014 | 9  | 13 | 15 | 14 | 9  | 0 |
| 2015 | 14 | 14 | 11 | 4  | 0  | 0 |
| 2016 | 5  | 15 | 15 | 2  | 7  | 0 |
| 2017 | 11 | 16 | 1  | 1  | 0  | 0 |
| 2018 | 16 | 16 | 16 | 10 | 0  | 0 |
| 2019 | 16 | 15 | 8  | 1  | 13 | 0 |
| 2020 | 11 | 8  | 14 | 3  | 0  | 0 |

| Piave – Brenta             |        |        |        |        |        |        |
|----------------------------|--------|--------|--------|--------|--------|--------|
| $\rho_s - 1500-2000$ m asl |        |        |        |        |        |        |
| Date                       | 01-feb | 01-mar | 01-apr | 15-apr | 01-mag | 01-giu |
| 1967                       | 3      | 3      | 3      | 4      | 4      | 0      |
| 1968                       | 4      | 4      | 4      | 4      | 2      | 0      |
| 1969                       | 4      | 4      | 4      | 4      | 4      | 0      |
| 1970                       | 4      | 4      | 4      | 4      | 4      | 0      |
| 1971                       | 4      | 3      | 4      | 4      | 4      | 1      |
| 1972                       | 4      | 4      | 4      | 4      | 4      | 1      |
| 1973                       | 4      | 4      | 4      | 4      | 4      | 0      |
| 1974                       | 4      | 4      | 4      | 4      | 4      | 1      |
| 1975                       | 4      | 4      | 3      | 4      | 4      | 2      |
| 1976                       | 4      | 4      | 4      | 4      | 4      | 0      |
| 1977                       | 3      | 4      | 3      | 4      | 4      | 3      |
| 1978                       | 4      | 4      | 4      | 4      | 4      | 3      |
| 1979                       | 4      | 4      | 4      | 4      | 4      | 4      |
| 1980                       | 4      | 4      | 5      | 4      | 4      | 2      |
| 1981                       | 4      | 4      | 3      | 1      | 3      | 0      |
| 1982                       | 4      | 4      | 4      | 4      | 3      | 0      |
| 1983                       | 4      | 4      | 4      | 4      | 3      | 0      |
| 1984                       | 4      | 3      | 4      | 4      | 4      | 3      |
| 1985                       | 5      | 4      | 4      | 4      | 4      | 1      |
| 1986                       | 4      | 4      | 4      | 4      | 4      | 0      |
| 1987                       | 4      | 4      | 2      | 4      | 4      | 1      |
| 1988                       | 4      | 4      | 4      | 3      | 2      | 0      |
| 1989                       | 4      | 4      | 4      | 4      | 2      | 0      |
| 1990                       | 0      | 0      | 0      | 0      | 0      | 0      |
| 1991                       | 0      | 0      | 0      | 0      | 0      | 0      |
| 1992                       | 0      | 0      | 0      | 0      | 0      | 0      |
| 1993                       | 1      | 1      | 1      | 1      | 1      | 0      |
| 1994                       | 3      | 3      | 3      | 3      | 3      | 0      |
| 1995                       | 3      | 3      | 3      | 3      | 2      | 0      |

|      |    |    |    |    |    |   |
|------|----|----|----|----|----|---|
| 1996 | 3  | 3  | 3  | 3  | 2  | 0 |
| 1997 | 3  | 3  | 3  | 1  | 2  | 0 |
| 1998 | 3  | 3  | 2  | 3  | 2  | 0 |
| 1999 | 3  | 3  | 3  | 3  | 3  | 0 |
| 2000 | 2  | 3  | 3  | 3  | 3  | 0 |
| 2001 | 2  | 3  | 3  | 3  | 3  | 1 |
| 2002 | 0  | 3  | 2  | 1  | 2  | 0 |
| 2003 | 2  | 3  | 2  | 3  | 1  | 0 |
| 2004 | 3  | 3  | 3  | 3  | 3  | 1 |
| 2005 | 11 | 11 | 8  | 9  | 7  | 0 |
| 2006 | 14 | 14 | 14 | 13 | 10 | 0 |
| 2007 | 14 | 14 | 14 | 11 | 1  | 0 |
| 2008 | 14 | 13 | 12 | 12 | 12 | 0 |
| 2009 | 14 | 14 | 13 | 13 | 12 | 1 |
| 2010 | 14 | 13 | 14 | 13 | 11 | 0 |
| 2011 | 14 | 14 | 13 | 10 | 6  | 0 |
| 2012 | 14 | 13 | 7  | 8  | 3  | 0 |
| 2013 | 14 | 14 | 14 | 14 | 12 | 3 |
| 2014 | 11 | 14 | 14 | 14 | 12 | 4 |
| 2015 | 14 | 14 | 12 | 12 | 6  | 0 |
| 2016 | 11 | 14 | 14 | 11 | 10 | 0 |
| 2017 | 11 | 15 | 8  | 2  | 5  | 0 |
| 2018 | 15 | 15 | 15 | 14 | 5  | 0 |
| 2019 | 15 | 15 | 13 | 13 | 13 | 5 |
| 2020 | 14 | 14 | 12 | 10 | 4  | 0 |

| Piave – Brenta             |        |        |        |        |        |        |
|----------------------------|--------|--------|--------|--------|--------|--------|
| $\rho_s - 2000-2500$ m asl |        |        |        |        |        |        |
| Date                       | 01-feb | 01-mar | 01-apr | 15-apr | 01-mag | 01-giu |
| 1967                       | 2      | 1      | 1      | 1      | 2      | 2      |
| 1968                       | 2      | 1      | 1      | 0      | 2      | 0      |
| 1969                       | 2      | 1      | 2      | 2      | 2      | 0      |
| 1970                       | 1      | 1      | 2      | 1      | 2      | 1      |
| 1971                       | 2      | 2      | 2      | 1      | 0      | 1      |
| 1972                       | 2      | 1      | 2      | 1      | 2      | 2      |
| 1973                       | 2      | 1      | 2      | 1      | 2      | 0      |
| 1974                       | 2      | 1      | 2      | 2      | 2      | 0      |
| 1975                       | 1      | 1      | 2      | 0      | 2      | 1      |
| 1976                       | 2      | 2      | 2      | 1      | 2      | 0      |
| 1977                       | 2      | 1      | 2      | 1      | 1      | 2      |
| 1978                       | 2      | 1      | 1      | 1      | 2      | 1      |
| 1979                       | 2      | 1      | 2      | 2      | 2      | 1      |
| 1980                       | 2      | 1      | 2      | 1      | 2      | 1      |
| 1981                       | 2      | 2      | 2      | 1      | 2      | 0      |
| 1982                       | 2      | 1      | 2      | 1      | 2      | 1      |
| 1983                       | 2      | 1      | 1      | 1      | 2      | 0      |
| 1984                       | 3      | 1      | 3      | 3      | 3      | 2      |
| 1985                       | 3      | 2      | 3      | 2      | 3      | 2      |
| 1986                       | 3      | 3      | 3      | 2      | 3      | 1      |
| 1987                       | 3      | 2      | 3      | 2      | 3      | 2      |
| 1988                       | 3      | 2      | 3      | 2      | 3      | 0      |
| 1989                       | 2      | 2      | 3      | 3      | 3      | 0      |
| 1990                       | 2      | 1      | 2      | 1      | 2      | 0      |
| 1991                       | 2      | 1      | 2      | 1      | 1      | 1      |
| 1992                       | 2      | 1      | 2      | 1      | 2      | 1      |
| 1993                       | 1      | 1      | 1      | 1      | 2      | 0      |
| 1994                       | 3      | 2      | 3      | 3      | 3      | 0      |
| 1995                       | 3      | 2      | 3      | 2      | 3      | 0      |

|      |   |   |   |   |   |   |
|------|---|---|---|---|---|---|
| 1996 | 3 | 3 | 3 | 2 | 3 | 0 |
| 1997 | 3 | 2 | 3 | 1 | 2 | 1 |
| 1998 | 3 | 2 | 3 | 1 | 3 | 0 |
| 1999 | 3 | 2 | 3 | 2 | 3 | 0 |
| 2000 | 3 | 1 | 2 | 1 | 2 | 0 |
| 2001 | 3 | 3 | 3 | 2 | 3 | 1 |
| 2002 | 2 | 2 | 3 | 1 | 3 | 1 |
| 2003 | 3 | 2 | 2 | 2 | 2 | 0 |
| 2004 | 3 | 2 | 3 | 3 | 2 | 0 |
| 2005 | 4 | 3 | 3 | 3 | 3 | 0 |
| 2006 | 5 | 5 | 5 | 5 | 5 | 2 |
| 2007 | 5 | 5 | 5 | 5 | 5 | 4 |
| 2008 | 5 | 5 | 5 | 5 | 5 | 5 |
| 2009 | 5 | 5 | 5 | 5 | 5 | 3 |
| 2010 | 5 | 5 | 6 | 5 | 5 | 4 |
| 2011 | 5 | 6 | 6 | 5 | 5 | 2 |
| 2012 | 5 | 6 | 6 | 5 | 6 | 1 |
| 2013 | 6 | 5 | 5 | 4 | 6 | 5 |
| 2014 | 3 | 5 | 6 | 5 | 5 | 4 |
| 2015 | 5 | 5 | 6 | 5 | 6 | 0 |
| 2016 | 6 | 6 | 6 | 5 | 5 | 1 |
| 2017 | 6 | 5 | 6 | 4 | 6 | 1 |
| 2018 | 6 | 5 | 5 | 5 | 6 | 0 |
| 2019 | 6 | 5 | 6 | 6 | 6 | 5 |
| 2020 | 5 | 5 | 4 | 3 | 4 | 0 |



| Piave – Brenta                     |        |        |        |        |        |        |
|------------------------------------|--------|--------|--------|--------|--------|--------|
| $\rho_s - 2500-3000 \text{ m asl}$ |        |        |        |        |        |        |
| Date                               | 01-feb | 01-mar | 01-apr | 15-apr | 01-mag | 01-giu |
| 1967                               | 0      | 0      | 0      | 0      | 0      | 0      |
| 1968                               | 0      | 0      | 0      | 0      | 0      | 0      |
| 1969                               | 0      | 0      | 0      | 0      | 0      | 0      |
| 1970                               | 0      | 0      | 0      | 0      | 0      | 0      |
| 1971                               | 0      | 0      | 0      | 0      | 0      | 0      |
| 1972                               | 0      | 0      | 0      | 0      | 0      | 0      |
| 1973                               | 0      | 0      | 0      | 0      | 0      | 0      |
| 1974                               | 0      | 0      | 0      | 0      | 0      | 0      |
| 1975                               | 0      | 0      | 0      | 0      | 0      | 0      |
| 1976                               | 0      | 0      | 0      | 0      | 0      | 0      |
| 1977                               | 0      | 0      | 0      | 0      | 0      | 0      |
| 1978                               | 0      | 0      | 0      | 0      | 0      | 0      |
| 1979                               | 0      | 0      | 0      | 0      | 0      | 0      |
| 1980                               | 0      | 0      | 0      | 0      | 0      | 0      |
| 1981                               | 0      | 0      | 0      | 0      | 0      | 0      |
| 1982                               | 0      | 0      | 0      | 0      | 0      | 0      |
| 1983                               | 0      | 0      | 0      | 0      | 0      | 0      |
| 1984                               | 0      | 0      | 0      | 0      | 0      | 0      |
| 1985                               | 0      | 0      | 0      | 0      | 0      | 0      |
| 1986                               | 0      | 0      | 0      | 0      | 0      | 0      |
| 1987                               | 0      | 0      | 0      | 0      | 0      | 0      |
| 1988                               | 0      | 0      | 0      | 0      | 0      | 0      |
| 1989                               | 0      | 0      | 0      | 0      | 0      | 0      |
| 1990                               | 0      | 0      | 0      | 0      | 0      | 0      |
| 1991                               | 0      | 0      | 0      | 0      | 0      | 0      |
| 1992                               | 0      | 0      | 0      | 0      | 0      | 0      |
| 1993                               | 0      | 0      | 0      | 0      | 0      | 0      |
| 1994                               | 0      | 0      | 0      | 0      | 0      | 0      |
| 1995                               | 0      | 0      | 0      | 0      | 0      | 0      |

|      |   |   |   |   |   |   |
|------|---|---|---|---|---|---|
| 1996 | 0 | 0 | 0 | 0 | 0 | 0 |
| 1997 | 0 | 0 | 0 | 0 | 0 | 0 |
| 1998 | 0 | 0 | 0 | 0 | 0 | 0 |
| 1999 | 0 | 0 | 0 | 0 | 0 | 0 |
| 2000 | 0 | 0 | 0 | 0 | 0 | 0 |
| 2001 | 0 | 0 | 0 | 0 | 0 | 0 |
| 2002 | 0 | 0 | 0 | 0 | 0 | 0 |
| 2003 | 0 | 0 | 0 | 0 | 0 | 0 |
| 2004 | 0 | 0 | 0 | 0 | 0 | 0 |
| 2005 | 1 | 1 | 1 | 1 | 1 | 1 |
| 2006 | 1 | 1 | 1 | 1 | 1 | 1 |
| 2007 | 1 | 1 | 1 | 1 | 1 | 1 |
| 2008 | 1 | 1 | 1 | 1 | 1 | 1 |
| 2009 | 1 | 1 | 1 | 1 | 1 | 1 |
| 2010 | 1 | 1 | 1 | 1 | 1 | 1 |
| 2011 | 1 | 1 | 1 | 1 | 1 | 1 |
| 2012 | 1 | 1 | 1 | 1 | 1 | 1 |
| 2013 | 1 | 1 | 0 | 1 | 0 | 1 |
| 2014 | 0 | 1 | 1 | 1 | 1 | 1 |
| 2015 | 1 | 1 | 1 | 1 | 1 | 1 |
| 2016 | 1 | 1 | 1 | 1 | 1 | 1 |
| 2017 | 1 | 1 | 1 | 1 | 1 | 1 |
| 2018 | 1 | 1 | 1 | 1 | 1 | 1 |
| 2019 | 1 | 1 | 1 | 1 | 1 | 1 |
| 2020 | 1 | 1 | 0 | 0 | 0 | 1 |

| Adige                      |        |        |        |        |        |        |
|----------------------------|--------|--------|--------|--------|--------|--------|
| $\rho_s - 1000-1500$ m asl |        |        |        |        |        |        |
| Date                       | 01-feb | 01-mar | 01-apr | 15-apr | 01-mag | 01-giu |
| 1967                       | 1      | 1      | 0      | 0      | 0      | 0      |
| 1968                       | 0      | 1      | 0      | 0      | 0      | 0      |
| 1969                       | 1      | 1      | 1      | 0      | 0      | 0      |
| 1970                       | 1      | 1      | 1      | 0      | 0      | 0      |
| 1971                       | 1      | 1      | 1      | 0      | 0      | 0      |
| 1972                       | 1      | 1      | 0      | 0      | 0      | 0      |
| 1973                       | 1      | 0      | 0      | 0      | 0      | 0      |
| 1974                       | 1      | 1      | 0      | 0      | 0      | 0      |
| 1975                       | 1      | 1      | 1      | 1      | 0      | 0      |
| 1976                       | 1      | 0      | 0      | 0      | 0      | 0      |
| 1977                       | 1      | 1      | 1      | 1      | 0      | 0      |
| 1978                       | 1      | 1      | 1      | 1      | 0      | 0      |
| 1979                       | 1      | 1      | 1      | 1      | 0      | 0      |
| 1980                       | 1      | 1      | 1      | 0      | 0      | 0      |
| 1981                       | 0      | 0      | 0      | 0      | 0      | 0      |
| 1982                       | 1      | 1      | 1      | 0      | 0      | 0      |
| 1983                       | 1      | 0      | 1      | 0      | 0      | 0      |
| 1984                       | 1      | 1      | 1      | 1      | 0      | 0      |
| 1985                       | 1      | 1      | 1      | 0      | 0      | 0      |
| 1986                       | 1      | 1      | 1      | 0      | 0      | 0      |
| 1987                       | 1      | 1      | 0      | 0      | 0      | 0      |
| 1988                       | 1      | 1      | 0      | 0      | 0      | 0      |
| 1989                       | 0      | 1      | 0      | 0      | 0      | 0      |
| 1990                       | 0      | 0      | 0      | 0      | 0      | 0      |
| 1991                       | 0      | 0      | 0      | 0      | 0      | 0      |
| 1992                       | 0      | 0      | 0      | 0      | 0      | 0      |
| 1993                       | 0      | 0      | 0      | 0      | 0      | 0      |
| 1994                       | 1      | 1      | 0      | 0      | 0      | 0      |
| 1995                       | 1      | 1      | 0      | 0      | 0      | 0      |

|      |   |   |   |   |   |   |
|------|---|---|---|---|---|---|
| 1996 | 0 | 0 | 0 | 0 | 0 | 0 |
| 1997 | 0 | 0 | 0 | 0 | 1 | 0 |
| 1998 | 1 | 1 | 0 | 1 | 0 | 0 |
| 1999 | 1 | 1 | 1 | 0 | 0 | 0 |
| 2000 | 1 | 0 | 1 | 0 | 0 | 0 |
| 2001 | 1 | 1 | 0 | 0 | 0 | 0 |
| 2002 | 0 | 1 | 0 | 0 | 0 | 0 |
| 2003 | 1 | 1 | 0 | 0 | 0 | 0 |
| 2004 | 1 | 1 | 1 | 0 | 0 | 0 |
| 2005 | 1 | 1 | 0 | 0 | 0 | 0 |
| 2006 | 0 | 0 | 0 | 0 | 0 | 0 |
| 2007 | 0 | 0 | 0 | 0 | 0 | 0 |
| 2008 | 0 | 0 | 0 | 0 | 0 | 0 |
| 2009 | 1 | 1 | 1 | 0 | 0 | 0 |
| 2010 | 1 | 1 | 0 | 0 | 0 | 0 |
| 2011 | 1 | 0 | 0 | 0 | 0 | 0 |
| 2012 | 1 | 0 | 0 | 0 | 0 | 0 |
| 2013 | 1 | 1 | 0 | 0 | 0 | 0 |
| 2014 | 1 | 1 | 0 | 0 | 0 | 0 |
| 2015 | 1 | 1 | 0 | 0 | 0 | 0 |
| 2016 | 0 | 0 | 0 | 0 | 0 | 0 |
| 2017 | 0 | 0 | 0 | 0 | 0 | 0 |
| 2018 | 1 | 1 | 0 | 0 | 0 | 0 |
| 2019 | 0 | 0 | 0 | 0 | 0 | 0 |
| 2020 | 1 | 1 | 0 | 0 | 0 | 0 |

| Adige                      |        |        |        |        |        |        |
|----------------------------|--------|--------|--------|--------|--------|--------|
| $\rho_s - 1500-2000$ m asl |        |        |        |        |        |        |
| Date                       | 01-feb | 01-mar | 01-apr | 15-apr | 01-mag | 01-giu |
| 1967                       | 2      | 2      | 2      | 2      | 2      | 3      |
| 1968                       | 2      | 2      | 2      | 2      | 1      | 0      |
| 1969                       | 2      | 2      | 2      | 2      | 2      | 0      |
| 1970                       | 2      | 2      | 2      | 2      | 2      | 0      |
| 1971                       | 2      | 2      | 2      | 2      | 2      | 0      |
| 1972                       | 2      | 2      | 2      | 2      | 2      | 0      |
| 1973                       | 2      | 2      | 2      | 2      | 2      | 0      |
| 1974                       | 2      | 2      | 2      | 2      | 2      | 0      |
| 1975                       | 2      | 2      | 2      | 2      | 2      | 0      |
| 1976                       | 2      | 2      | 2      | 2      | 2      | 0      |
| 1977                       | 2      | 2      | 2      | 2      | 2      | 0      |
| 1978                       | 2      | 2      | 2      | 2      | 2      | 2      |
| 1979                       | 2      | 2      | 2      | 2      | 2      | 2      |
| 1980                       | 2      | 2      | 2      | 2      | 2      | 0      |
| 1981                       | 2      | 2      | 2      | 2      | 2      | 0      |
| 1982                       | 2      | 2      | 2      | 2      | 2      | 0      |
| 1983                       | 2      | 2      | 2      | 2      | 2      | 0      |
| 1984                       | 2      | 2      | 2      | 2      | 2      | 0      |
| 1985                       | 2      | 2      | 1      | 1      | 2      | 0      |
| 1986                       | 2      | 2      | 2      | 2      | 2      | 0      |
| 1987                       | 2      | 2      | 2      | 2      | 2      | 0      |
| 1988                       | 2      | 2      | 1      | 1      | 0      | 0      |
| 1989                       | 0      | 2      | 1      | 2      | 2      | 0      |
| 1990                       | 0      | 0      | 0      | 0      | 0      | 0      |
| 1991                       | 0      | 0      | 0      | 0      | 0      | 0      |
| 1992                       | 0      | 0      | 0      | 0      | 0      | 0      |
| 1993                       | 0      | 0      | 0      | 0      | 0      | 0      |
| 1994                       | 2      | 2      | 2      | 2      | 1      | 0      |
| 1995                       | 2      | 2      | 2      | 2      | 1      | 0      |

|      |   |   |   |   |   |   |
|------|---|---|---|---|---|---|
| 1996 | 0 | 0 | 0 | 0 | 0 | 0 |
| 1997 | 0 | 0 | 0 | 0 | 1 | 0 |
| 1998 | 2 | 2 | 2 | 2 | 2 | 0 |
| 1999 | 2 | 2 | 2 | 2 | 2 | 0 |
| 2000 | 2 | 2 | 2 | 2 | 1 | 0 |
| 2001 | 2 | 2 | 2 | 2 | 2 | 0 |
| 2002 | 1 | 2 | 2 | 1 | 2 | 0 |
| 2003 | 2 | 2 | 2 | 2 | 1 | 0 |
| 2004 | 2 | 2 | 2 | 2 | 2 | 0 |
| 2005 | 2 | 2 | 1 | 2 | 1 | 0 |
| 2006 | 0 | 0 | 0 | 0 | 0 | 0 |
| 2007 | 0 | 0 | 0 | 0 | 0 | 0 |
| 2008 | 0 | 0 | 0 | 0 | 0 | 0 |
| 2009 | 2 | 2 | 3 | 3 | 3 | 0 |
| 2010 | 3 | 1 | 3 | 3 | 3 | 0 |
| 2011 | 3 | 3 | 3 | 3 | 3 | 0 |
| 2012 | 3 | 2 | 2 | 2 | 2 | 0 |
| 2013 | 3 | 3 | 3 | 3 | 3 | 0 |
| 2014 | 3 | 3 | 3 | 3 | 2 | 0 |
| 2015 | 3 | 3 | 3 | 2 | 0 | 0 |
| 2016 | 3 | 3 | 3 | 2 | 0 | 0 |
| 2017 | 3 | 1 | 0 | 0 | 3 | 0 |
| 2018 | 3 | 3 | 3 | 3 | 1 | 0 |
| 2019 | 3 | 3 | 3 | 3 | 3 | 0 |
| 2020 | 3 | 3 | 3 | 3 | 1 | 0 |

| Adige                      |        |        |        |        |        |        |
|----------------------------|--------|--------|--------|--------|--------|--------|
| $\rho_s - 2000-2500$ m asl |        |        |        |        |        |        |
| Date                       | 01-feb | 01-mar | 01-apr | 15-apr | 01-mag | 01-giu |
| 1967                       | 0      | 1      | 1      | 1      | 1      | 2      |
| 1968                       | 1      | 1      | 1      | 1      | 2      | 1      |
| 1969                       | 1      | 1      | 1      | 1      | 1      | 1      |
| 1970                       | 1      | 1      | 1      | 1      | 1      | 1      |
| 1971                       | 1      | 1      | 1      | 1      | 1      | 1      |
| 1972                       | 1      | 1      | 1      | 1      | 1      | 1      |
| 1973                       | 1      | 1      | 1      | 1      | 1      | 1      |
| 1974                       | 1      | 1      | 1      | 1      | 1      | 1      |
| 1975                       | 1      | 1      | 1      | 1      | 1      | 1      |
| 1976                       | 1      | 1      | 1      | 1      | 1      | 1      |
| 1977                       | 1      | 1      | 1      | 1      | 1      | 1      |
| 1978                       | 1      | 1      | 1      | 1      | 1      | 1      |
| 1979                       | 1      | 1      | 1      | 1      | 1      | 1      |
| 1980                       | 1      | 1      | 1      | 1      | 1      | 1      |
| 1981                       | 1      | 1      | 1      | 1      | 1      | 1      |
| 1982                       | 2      | 1      | 1      | 1      | 1      | 1      |
| 1983                       | 1      | 1      | 1      | 1      | 1      | 1      |
| 1984                       | 1      | 1      | 1      | 1      | 1      | 1      |
| 1985                       | 1      | 1      | 1      | 1      | 1      | 1      |
| 1986                       | 1      | 1      | 1      | 1      | 1      | 1      |
| 1987                       | 1      | 1      | 1      | 1      | 1      | 1      |
| 1988                       | 1      | 1      | 1      | 1      | 1      | 1      |
| 1989                       | 1      | 1      | 1      | 1      | 1      | 1      |
| 1990                       | 1      | 1      | 1      | 1      | 1      | 1      |
| 1991                       | 1      | 1      | 1      | 1      | 1      | 1      |
| 1992                       | 1      | 1      | 1      | 1      | 1      | 1      |
| 1993                       | 1      | 1      | 1      | 1      | 1      | 1      |
| 1994                       | 1      | 1      | 1      | 1      | 1      | 1      |
| 1995                       | 1      | 1      | 1      | 1      | 1      | 1      |

|      |   |   |   |   |   |   |
|------|---|---|---|---|---|---|
| 1996 | 1 | 1 | 1 | 1 | 1 | 1 |
| 1997 | 1 | 1 | 1 | 1 | 1 | 1 |
| 1998 | 1 | 1 | 1 | 1 | 1 | 1 |
| 1999 | 1 | 1 | 1 | 1 | 1 | 1 |
| 2000 | 1 | 1 | 1 | 1 | 1 | 1 |
| 2001 | 1 | 1 | 1 | 1 | 1 | 1 |
| 2002 | 1 | 1 | 1 | 1 | 1 | 1 |
| 2003 | 1 | 1 | 1 | 1 | 1 | 1 |
| 2004 | 1 | 1 | 1 | 1 | 1 | 1 |
| 2005 | 1 | 1 | 1 | 1 | 1 | 1 |
| 2006 | 1 | 1 | 1 | 1 | 1 | 1 |
| 2007 | 1 | 1 | 1 | 1 | 1 | 1 |
| 2008 | 1 | 1 | 1 | 1 | 1 | 1 |
| 2009 | 1 | 1 | 2 | 2 | 2 | 1 |
| 2010 | 2 | 1 | 3 | 3 | 3 | 1 |
| 2011 | 3 | 3 | 3 | 3 | 3 | 1 |
| 2012 | 3 | 1 | 1 | 1 | 1 | 1 |
| 2013 | 3 | 3 | 3 | 3 | 2 | 1 |
| 2014 | 3 | 3 | 2 | 2 | 3 | 1 |
| 2015 | 2 | 3 | 2 | 2 | 1 | 1 |
| 2016 | 3 | 3 | 3 | 3 | 1 | 1 |
| 2017 | 3 | 1 | 2 | 1 | 3 | 1 |
| 2018 | 3 | 3 | 3 | 3 | 3 | 1 |
| 2019 | 3 | 3 | 3 | 3 | 3 | 1 |
| 2020 | 3 | 3 | 3 | 3 | 2 | 1 |



| Adige                      |        |        |        |        |        |        |
|----------------------------|--------|--------|--------|--------|--------|--------|
| $\rho_s - 2500-3000$ m asl |        |        |        |        |        |        |
| Date                       | 01-feb | 01-mar | 01-apr | 15-apr | 01-mag | 01-giu |
| 1967                       | 4      | 4      | 4      | 4      | 4      | 4      |
| 1968                       | 4      | 4      | 4      | 4      | 4      | 4      |
| 1969                       | 4      | 4      | 4      | 4      | 4      | 4      |
| 1970                       | 4      | 4      | 4      | 4      | 4      | 4      |
| 1971                       | 4      | 4      | 4      | 4      | 4      | 4      |
| 1972                       | 4      | 4      | 4      | 4      | 4      | 4      |
| 1973                       | 4      | 4      | 3      | 4      | 4      | 3      |
| 1974                       | 4      | 4      | 4      | 4      | 3      | 3      |
| 1975                       | 4      | 4      | 4      | 3      | 4      | 4      |
| 1976                       | 4      | 4      | 4      | 4      | 4      | 1      |
| 1977                       | 3      | 3      | 3      | 3      | 3      | 3      |
| 1978                       | 4      | 4      | 4      | 4      | 4      | 4      |
| 1979                       | 3      | 3      | 3      | 3      | 3      | 3      |
| 1980                       | 4      | 4      | 4      | 4      | 4      | 4      |
| 1981                       | 4      | 4      | 4      | 4      | 4      | 3      |
| 1982                       | 4      | 4      | 4      | 4      | 4      | 3      |
| 1983                       | 4      | 4      | 4      | 4      | 3      | 3      |
| 1984                       | 4      | 3      | 3      | 3      | 4      | 3      |
| 1985                       | 3      | 3      | 3      | 3      | 4      | 3      |
| 1986                       | 2      | 3      | 2      | 3      | 4      | 4      |
| 1987                       | 4      | 3      | 4      | 4      | 4      | 4      |
| 1988                       | 3      | 4      | 3      | 4      | 1      | 4      |
| 1989                       | 0      | 3      | 4      | 4      | 3      | 4      |
| 1990                       | 0      | 0      | 0      | 0      | 0      | 0      |
| 1991                       | 0      | 0      | 0      | 0      | 0      | 0      |
| 1992                       | 0      | 0      | 0      | 0      | 0      | 1      |
| 1993                       | 0      | 0      | 0      | 0      | 0      | 0      |
| 1994                       | 1      | 1      | 1      | 1      | 1      | 1      |
| 1995                       | 1      | 1      | 1      | 1      | 1      | 1      |

|      |   |   |   |   |   |   |
|------|---|---|---|---|---|---|
| 1996 | 0 | 0 | 0 | 0 | 0 | 0 |
| 1997 | 0 | 0 | 0 | 0 | 1 | 0 |
| 1998 | 1 | 1 | 1 | 1 | 1 | 1 |
| 1999 | 4 | 4 | 4 | 4 | 4 | 4 |
| 2000 | 4 | 4 | 2 | 4 | 4 | 3 |
| 2001 | 3 | 3 | 3 | 1 | 3 | 4 |
| 2002 | 4 | 4 | 4 | 3 | 4 | 4 |
| 2003 | 4 | 4 | 4 | 4 | 4 | 2 |
| 2004 | 3 | 3 | 4 | 4 | 4 | 4 |
| 2005 | 4 | 4 | 4 | 3 | 4 | 2 |
| 2006 | 0 | 0 | 0 | 0 | 0 | 0 |
| 2007 | 0 | 0 | 0 | 0 | 0 | 0 |
| 2008 | 0 | 0 | 0 | 0 | 0 | 0 |
| 2009 | 3 | 4 | 4 | 4 | 4 | 4 |
| 2010 | 4 | 0 | 3 | 4 | 4 | 4 |
| 2011 | 3 | 3 | 4 | 4 | 4 | 3 |
| 2012 | 4 | 4 | 4 | 4 | 4 | 3 |
| 2013 | 4 | 4 | 3 | 4 | 4 | 3 |
| 2014 | 3 | 3 | 3 | 4 | 3 | 4 |
| 2015 | 4 | 3 | 3 | 4 | 4 | 3 |
| 2016 | 4 | 3 | 4 | 4 | 4 | 3 |
| 2017 | 3 | 1 | 4 | 1 | 0 | 0 |
| 2018 | 3 | 3 | 4 | 1 | 3 | 4 |
| 2019 | 4 | 1 | 4 | 2 | 3 | 4 |
| 2020 | 3 | 2 | 3 | 3 | 3 | 0 |

## Oglio – Chiese – Sarca

 $\rho_s - 1000-1500$  m asl

| Date | 01-feb | 01-mar | 01-apr | 15-apr | 01-mag | 01-giu |
|------|--------|--------|--------|--------|--------|--------|
| 1967 | 6      | 6      | 2      | 4      | 2      | 0      |
| 1968 | 5      | 6      | 5      | 4      | 0      | 0      |
| 1969 | 6      | 6      | 6      | 6      | 4      | 0      |
| 1970 | 6      | 5      | 6      | 6      | 4      | 0      |
| 1971 | 6      | 6      | 6      | 5      | 2      | 0      |
| 1972 | 6      | 6      | 6      | 2      | 1      | 0      |
| 1973 | 6      | 6      | 3      | 6      | 2      | 0      |
| 1974 | 6      | 6      | 4      | 2      | 2      | 0      |
| 1975 | 6      | 6      | 6      | 6      | 4      | 0      |
| 1976 | 6      | 6      | 4      | 1      | 3      | 0      |
| 1977 | 6      | 6      | 6      | 6      | 5      | 3      |
| 1978 | 6      | 6      | 6      | 6      | 6      | 3      |
| 1979 | 6      | 6      | 6      | 6      | 6      | 3      |
| 1980 | 6      | 6      | 6      | 6      | 5      | 3      |
| 1981 | 6      | 5      | 5      | 2      | 4      | 3      |
| 1982 | 7      | 6      | 6      | 5      | 3      | 2      |
| 1983 | 4      | 6      | 5      | 4      | 2      | 3      |
| 1984 | 6      | 6      | 6      | 4      | 5      | 2      |
| 1985 | 4      | 5      | 6      | 6      | 4      | 1      |
| 1986 | 6      | 6      | 6      | 4      | 4      | 0      |
| 1987 | 6      | 6      | 6      | 6      | 3      | 0      |
| 1988 | 6      | 6      | 5      | 3      | 3      | 0      |
| 1989 | 1      | 6      | 3      | 0      | 3      | 0      |
| 1990 | 4      | 1      | 3      | 2      | 1      | 0      |
| 1991 | 4      | 0      | 3      | 0      | 2      | 0      |
| 1992 | 4      | 0      | 4      | 0      | 0      | 0      |
| 1993 | 0      | 0      | 0      | 0      | 0      | 0      |
| 1994 | 5      | 5      | 2      | 3      | 2      | 0      |
| 1995 | 5      | 5      | 4      | 4      | 0      | 0      |

|      |   |   |   |   |   |   |
|------|---|---|---|---|---|---|
| 1996 | 0 | 0 | 0 | 0 | 0 | 0 |
| 1997 | 4 | 0 | 0 | 0 | 0 | 0 |
| 1998 | 4 | 2 | 1 | 4 | 0 | 0 |
| 1999 | 5 | 3 | 3 | 1 | 0 | 0 |
| 2000 | 5 | 3 | 5 | 0 | 0 | 0 |
| 2001 | 4 | 5 | 2 | 1 | 0 | 0 |
| 2002 | 0 | 4 | 0 | 0 | 0 | 0 |
| 2003 | 3 | 3 | 0 | 0 | 0 | 0 |
| 2004 | 4 | 4 | 4 | 2 | 0 | 0 |
| 2005 | 3 | 3 | 0 | 0 | 0 | 0 |
| 2006 | 0 | 0 | 0 | 0 | 0 | 0 |
| 2007 | 1 | 3 | 2 | 0 | 0 | 0 |
| 2008 | 4 | 3 | 2 | 2 | 1 | 0 |
| 2009 | 5 | 5 | 5 | 4 | 1 | 0 |
| 2010 | 5 | 4 | 4 | 2 | 1 | 0 |
| 2011 | 5 | 5 | 2 | 0 | 0 | 0 |
| 2012 | 5 | 4 | 0 | 1 | 0 | 0 |
| 2013 | 2 | 2 | 3 | 3 | 0 | 0 |
| 2014 | 2 | 3 | 3 | 1 | 0 | 0 |
| 2015 | 3 | 3 | 0 | 0 | 0 | 0 |
| 2016 | 0 | 3 | 1 | 0 | 0 | 0 |
| 2017 | 0 | 2 | 0 | 0 | 0 | 0 |
| 2018 | 3 | 3 | 3 | 0 | 0 | 0 |
| 2019 | 3 | 0 | 0 | 0 | 0 | 0 |
| 2020 | 2 | 1 | 0 | 0 | 0 | 0 |

## Oglio – Chiese – Sarca

 $\rho_s$  – 1500-2000 m asl

| Date | 01-feb | 01-mar | 01-apr | 15-apr | 01-mag | 01-giu |
|------|--------|--------|--------|--------|--------|--------|
| 1967 | 3      | 4      | 4      | 4      | 3      | 0      |
| 1968 | 4      | 3      | 4      | 4      | 7      | 0      |
| 1969 | 4      | 4      | 4      | 4      | 5      | 0      |
| 1970 | 4      | 4      | 4      | 4      | 4      | 0      |
| 1971 | 4      | 4      | 4      | 4      | 4      | 0      |
| 1972 | 4      | 4      | 4      | 4      | 4      | 0      |
| 1973 | 4      | 4      | 4      | 4      | 4      | 0      |
| 1974 | 4      | 4      | 4      | 4      | 4      | 1      |
| 1975 | 4      | 4      | 4      | 1      | 2      | 1      |
| 1976 | 4      | 4      | 4      | 4      | 3      | 0      |
| 1977 | 4      | 4      | 4      | 4      | 4      | 3      |
| 1978 | 4      | 4      | 4      | 4      | 4      | 2      |
| 1979 | 4      | 4      | 4      | 4      | 4      | 3      |
| 1980 | 4      | 4      | 4      | 3      | 4      | 2      |
| 1981 | 4      | 4      | 4      | 1      | 3      | 1      |
| 1982 | 4      | 4      | 4      | 4      | 4      | 1      |
| 1983 | 4      | 4      | 4      | 4      | 4      | 1      |
| 1984 | 6      | 4      | 4      | 4      | 4      | 4      |
| 1985 | 4      | 4      | 4      | 4      | 4      | 1      |
| 1986 | 4      | 4      | 4      | 4      | 4      | 0      |
| 1987 | 4      | 4      | 4      | 2      | 3      | 0      |
| 1988 | 4      | 4      | 4      | 4      | 3      | 0      |
| 1989 | 2      | 2      | 3      | 4      | 2      | 0      |
| 1990 | 2      | 2      | 3      | 3      | 2      | 0      |
| 1991 | 3      | 2      | 3      | 2      | 3      | 1      |
| 1992 | 1      | 2      | 3      | 2      | 2      | 0      |
| 1993 | 0      | 2      | 2      | 2      | 0      | 0      |
| 1994 | 2      | 4      | 4      | 4      | 1      | 0      |
| 1995 | 2      | 4      | 4      | 4      | 2      | 0      |

|      |   |   |   |   |   |   |
|------|---|---|---|---|---|---|
| 1996 | 0 | 2 | 2 | 2 | 0 | 0 |
| 1997 | 1 | 2 | 2 | 0 | 0 | 0 |
| 1998 | 1 | 4 | 4 | 4 | 4 | 0 |
| 1999 | 4 | 4 | 4 | 4 | 4 | 0 |
| 2000 | 4 | 4 | 4 | 4 | 2 | 0 |
| 2001 | 4 | 4 | 4 | 4 | 4 | 0 |
| 2002 | 2 | 4 | 4 | 4 | 0 | 0 |
| 2003 | 4 | 4 | 3 | 4 | 0 | 0 |
| 2004 | 4 | 4 | 4 | 4 | 4 | 0 |
| 2005 | 4 | 4 | 3 | 3 | 0 | 0 |
| 2006 | 2 | 2 | 2 | 2 | 2 | 0 |
| 2007 | 3 | 3 | 3 | 0 | 0 | 0 |
| 2008 | 3 | 3 | 3 | 2 | 3 | 0 |
| 2009 | 4 | 2 | 4 | 4 | 4 | 0 |
| 2010 | 4 | 3 | 4 | 4 | 3 | 0 |
| 2011 | 4 | 4 | 4 | 4 | 0 | 0 |
| 2012 | 4 | 4 | 2 | 2 | 2 | 0 |
| 2013 | 4 | 3 | 2 | 2 | 2 | 0 |
| 2014 | 0 | 2 | 2 | 2 | 2 | 0 |
| 2015 | 3 | 3 | 3 | 2 | 0 | 0 |
| 2016 | 2 | 2 | 2 | 2 | 0 | 0 |
| 2017 | 1 | 2 | 1 | 0 | 2 | 0 |
| 2018 | 2 | 2 | 2 | 0 | 1 | 0 |
| 2019 | 2 | 4 | 3 | 3 | 2 | 0 |
| 2020 | 3 | 4 | 2 | 2 | 0 | 0 |

## Oglio – Chiese – Sarca

 $\rho_s$  – 2000-2500 m asl

| Date | 01-feb | 01-mar | 01-apr | 15-apr | 01-mag | 01-giu |
|------|--------|--------|--------|--------|--------|--------|
| 1967 | 5      | 7      | 7      | 6      | 7      | 4      |
| 1968 | 6      | 7      | 7      | 7      | 7      | 4      |
| 1969 | 6      | 7      | 7      | 7      | 7      | 2      |
| 1970 | 7      | 6      | 7      | 7      | 7      | 5      |
| 1971 | 5      | 7      | 7      | 6      | 6      | 4      |
| 1972 | 6      | 7      | 7      | 6      | 7      | 6      |
| 1973 | 6      | 5      | 6      | 7      | 7      | 1      |
| 1974 | 7      | 7      | 7      | 7      | 7      | 2      |
| 1975 | 7      | 7      | 5      | 2      | 4      | 6      |
| 1976 | 7      | 7      | 7      | 6      | 7      | 0      |
| 1977 | 6      | 3      | 3      | 5      | 7      | 6      |
| 1978 | 5      | 5      | 6      | 5      | 6      | 7      |
| 1979 | 3      | 6      | 4      | 7      | 5      | 5      |
| 1980 | 5      | 5      | 5      | 3      | 7      | 6      |
| 1981 | 7      | 7      | 6      | 2      | 6      | 2      |
| 1982 | 7      | 7      | 7      | 7      | 7      | 2      |
| 1983 | 7      | 7      | 7      | 7      | 7      | 5      |
| 1984 | 7      | 6      | 7      | 7      | 7      | 6      |
| 1985 | 7      | 4      | 6      | 7      | 7      | 5      |
| 1986 | 3      | 4      | 4      | 2      | 2      | 4      |
| 1987 | 3      | 3      | 3      | 3      | 3      | 1      |
| 1988 | 2      | 3      | 3      | 3      | 3      | 1      |
| 1989 | 2      | 2      | 2      | 7      | 3      | 0      |
| 1990 | 7      | 6      | 7      | 7      | 7      | 0      |
| 1991 | 7      | 4      | 7      | 4      | 7      | 6      |
| 1992 | 3      | 4      | 7      | 4      | 4      | 1      |
| 1993 | 0      | 4      | 4      | 4      | 4      | 0      |
| 1994 | 3      | 6      | 7      | 7      | 6      | 2      |
| 1995 | 3      | 6      | 7      | 7      | 7      | 1      |

|      |   |    |   |   |   |   |
|------|---|----|---|---|---|---|
| 1996 | 0 | 4  | 4 | 4 | 3 | 3 |
| 1997 | 3 | 4  | 7 | 4 | 7 | 0 |
| 1998 | 3 | 7  | 7 | 7 | 7 | 0 |
| 1999 | 8 | 8  | 7 | 8 | 8 | 0 |
| 2000 | 8 | 8  | 8 | 8 | 7 | 0 |
| 2001 | 8 | 8  | 8 | 8 | 8 | 4 |
| 2002 | 4 | 8  | 8 | 7 | 8 | 0 |
| 2003 | 8 | 8  | 8 | 8 | 7 | 0 |
| 2004 | 8 | 8  | 8 | 8 | 8 | 5 |
| 2005 | 8 | 5  | 7 | 7 | 4 | 0 |
| 2006 | 6 | 6  | 6 | 6 | 6 | 0 |
| 2007 | 8 | 8  | 8 | 2 | 0 | 0 |
| 2008 | 8 | 8  | 9 | 9 | 9 | 1 |
| 2009 | 4 | 3  | 8 | 9 | 9 | 2 |
| 2010 | 9 | 9  | 9 | 9 | 9 | 1 |
| 2011 | 9 | 9  | 9 | 9 | 6 | 0 |
| 2012 | 9 | 8  | 8 | 9 | 9 | 1 |
| 2013 | 5 | 7  | 7 | 5 | 6 | 3 |
| 2014 | 2 | 8  | 8 | 6 | 5 | 4 |
| 2015 | 8 | 8  | 6 | 7 | 3 | 0 |
| 2016 | 5 | 4  | 8 | 4 | 0 | 0 |
| 2017 | 3 | 3  | 3 | 3 | 3 | 1 |
| 2018 | 3 | 10 | 5 | 4 | 8 | 0 |
| 2019 | 3 | 3  | 3 | 4 | 1 | 2 |
| 2020 | 3 | 3  | 2 | 3 | 3 | 1 |



## Oglio – Chiese – Sarca

 $\rho_s$  – 2500-3000 m asl

| Date | 01-feb | 01-mar | 01-apr | 15-apr | 01-mag | 01-giu |
|------|--------|--------|--------|--------|--------|--------|
| 1967 | 4      | 4      | 4      | 3      | 3      | 4      |
| 1968 | 4      | 4      | 4      | 4      | 4      | 4      |
| 1969 | 4      | 4      | 4      | 4      | 4      | 3      |
| 1970 | 4      | 3      | 4      | 4      | 4      | 4      |
| 1971 | 4      | 4      | 4      | 4      | 4      | 4      |
| 1972 | 4      | 4      | 3      | 3      | 4      | 4      |
| 1973 | 4      | 4      | 4      | 4      | 4      | 2      |
| 1974 | 4      | 4      | 4      | 4      | 4      | 4      |
| 1975 | 4      | 4      | 3      | 1      | 4      | 4      |
| 1976 | 4      | 4      | 4      | 4      | 4      | 2      |
| 1977 | 3      | 2      | 2      | 4      | 4      | 4      |
| 1978 | 3      | 4      | 4      | 4      | 4      | 4      |
| 1979 | 2      | 4      | 4      | 4      | 4      | 4      |
| 1980 | 3      | 3      | 3      | 3      | 3      | 3      |
| 1981 | 4      | 4      | 4      | 4      | 4      | 4      |
| 1982 | 4      | 4      | 4      | 4      | 4      | 2      |
| 1983 | 4      | 4      | 4      | 4      | 4      | 4      |
| 1984 | 3      | 4      | 4      | 4      | 4      | 4      |
| 1985 | 4      | 4      | 4      | 4      | 4      | 4      |
| 1986 | 4      | 4      | 4      | 4      | 2      | 4      |
| 1987 | 2      | 4      | 4      | 2      | 2      | 2      |
| 1988 | 4      | 4      | 3      | 4      | 4      | 2      |
| 1989 | 1      | 2      | 4      | 4      | 1      | 2      |
| 1990 | 4      | 4      | 4      | 4      | 3      | 1      |
| 1991 | 4      | 2      | 4      | 2      | 4      | 4      |
| 1992 | 2      | 2      | 4      | 2      | 2      | 1      |
| 1993 | 0      | 2      | 2      | 2      | 2      | 2      |
| 1994 | 2      | 4      | 4      | 4      | 4      | 3      |
| 1995 | 2      | 4      | 4      | 4      | 4      | 2      |

|      |   |   |   |   |   |   |
|------|---|---|---|---|---|---|
| 1996 | 0 | 2 | 2 | 2 | 2 | 4 |
| 1997 | 2 | 2 | 4 | 4 | 4 | 0 |
| 1998 | 2 | 4 | 4 | 4 | 4 | 2 |
| 1999 | 4 | 4 | 4 | 4 | 4 | 2 |
| 2000 | 4 | 4 | 4 | 4 | 4 | 1 |
| 2001 | 4 | 4 | 4 | 4 | 4 | 4 |
| 2002 | 3 | 4 | 4 | 4 | 4 | 3 |
| 2003 | 4 | 4 | 4 | 4 | 4 | 2 |
| 2004 | 4 | 4 | 4 | 4 | 4 | 4 |
| 2005 | 4 | 3 | 4 | 4 | 4 | 2 |
| 2006 | 3 | 3 | 3 | 3 | 3 | 3 |
| 2007 | 5 | 5 | 5 | 2 | 1 | 1 |
| 2008 | 5 | 2 | 5 | 4 | 5 | 3 |
| 2009 | 2 | 2 | 2 | 5 | 5 | 5 |
| 2010 | 5 | 5 | 5 | 5 | 5 | 3 |
| 2011 | 5 | 5 | 5 | 5 | 5 | 5 |
| 2012 | 5 | 5 | 5 | 4 | 5 | 4 |
| 2013 | 1 | 4 | 4 | 1 | 0 | 4 |
| 2014 | 3 | 6 | 6 | 3 | 1 | 3 |
| 2015 | 6 | 6 | 5 | 4 | 5 | 3 |
| 2016 | 1 | 4 | 2 | 3 | 2 | 0 |
| 2017 | 2 | 3 | 3 | 3 | 3 | 3 |
| 2018 | 3 | 2 | 3 | 3 | 3 | 0 |
| 2019 | 3 | 0 | 3 | 3 | 1 | 2 |
| 2020 | 3 | 3 | 2 | 3 | 1 | 3 |

| Serio - Brembo             |        |        |        |        |        |        |
|----------------------------|--------|--------|--------|--------|--------|--------|
| $\rho_s - 1000-1500$ m asl |        |        |        |        |        |        |
| Date                       | 01-feb | 01-mar | 01-apr | 15-apr | 01-mag | 01-giu |
| 1967                       | 0      | 0      | 0      | 0      | 0      | 0      |
| 1968                       | 0      | 0      | 0      | 0      | 0      | 0      |
| 1969                       | 0      | 0      | 0      | 0      | 0      | 0      |
| 1970                       | 0      | 0      | 0      | 0      | 0      | 0      |
| 1971                       | 0      | 0      | 0      | 0      | 0      | 0      |
| 1972                       | 0      | 0      | 0      | 0      | 0      | 0      |
| 1973                       | 0      | 0      | 0      | 0      | 0      | 0      |
| 1974                       | 0      | 0      | 0      | 0      | 0      | 0      |
| 1975                       | 0      | 0      | 0      | 0      | 0      | 0      |
| 1976                       | 0      | 0      | 0      | 0      | 0      | 0      |
| 1977                       | 0      | 0      | 0      | 0      | 0      | 0      |
| 1978                       | 0      | 0      | 0      | 0      | 0      | 0      |
| 1979                       | 0      | 0      | 0      | 0      | 0      | 0      |
| 1980                       | 0      | 0      | 0      | 0      | 0      | 0      |
| 1981                       | 0      | 0      | 0      | 0      | 0      | 0      |
| 1982                       | 0      | 0      | 0      | 0      | 0      | 0      |
| 1983                       | 0      | 0      | 0      | 0      | 0      | 0      |
| 1984                       | 0      | 0      | 0      | 0      | 0      | 0      |
| 1985                       | 0      | 0      | 0      | 0      | 0      | 0      |
| 1986                       | 0      | 0      | 0      | 0      | 0      | 0      |
| 1987                       | 0      | 0      | 0      | 0      | 0      | 0      |
| 1988                       | 0      | 0      | 0      | 0      | 0      | 0      |
| 1989                       | 0      | 0      | 0      | 0      | 0      | 0      |
| 1990                       | 0      | 0      | 0      | 0      | 0      | 0      |
| 1991                       | 0      | 0      | 0      | 0      | 0      | 0      |
| 1992                       | 0      | 0      | 0      | 0      | 0      | 0      |
| 1993                       | 0      | 0      | 0      | 0      | 0      | 0      |
| 1994                       | 0      | 0      | 0      | 0      | 0      | 0      |
| 1995                       | 0      | 0      | 0      | 0      | 0      | 0      |

|      |   |   |   |   |   |   |
|------|---|---|---|---|---|---|
| 1996 | 0 | 0 | 0 | 0 | 0 | 0 |
| 1997 | 0 | 0 | 0 | 0 | 0 | 0 |
| 1998 | 0 | 0 | 0 | 0 | 0 | 0 |
| 1999 | 0 | 0 | 0 | 0 | 0 | 0 |
| 2000 | 0 | 0 | 0 | 0 | 0 | 0 |
| 2001 | 0 | 0 | 0 | 0 | 0 | 0 |
| 2002 | 0 | 0 | 0 | 0 | 0 | 0 |
| 2003 | 0 | 0 | 0 | 0 | 0 | 0 |
| 2004 | 0 | 0 | 0 | 0 | 0 | 0 |
| 2005 | 0 | 0 | 0 | 0 | 0 | 0 |
| 2006 | 0 | 0 | 0 | 0 | 0 | 0 |
| 2007 | 0 | 0 | 0 | 0 | 0 | 0 |
| 2008 | 0 | 0 | 0 | 0 | 0 | 0 |
| 2009 | 0 | 0 | 0 | 0 | 0 | 0 |
| 2010 | 0 | 0 | 0 | 0 | 0 | 0 |
| 2011 | 0 | 0 | 0 | 0 | 0 | 0 |
| 2012 | 0 | 0 | 0 | 0 | 0 | 0 |
| 2013 | 0 | 0 | 0 | 0 | 0 | 0 |
| 2014 | 0 | 0 | 0 | 0 | 0 | 0 |
| 2015 | 0 | 0 | 0 | 0 | 0 | 0 |
| 2016 | 0 | 0 | 0 | 0 | 0 | 0 |
| 2017 | 0 | 0 | 0 | 0 | 0 | 0 |
| 2018 | 0 | 0 | 0 | 0 | 0 | 0 |
| 2019 | 0 | 0 | 0 | 0 | 0 | 0 |
| 2020 | 0 | 0 | 0 | 0 | 0 | 0 |

| Serio - Brembo             |        |        |        |        |        |        |
|----------------------------|--------|--------|--------|--------|--------|--------|
| $\rho_s - 1500-2000$ m asl |        |        |        |        |        |        |
| Date                       | 01-feb | 01-mar | 01-apr | 15-apr | 01-mag | 01-giu |
| 1967                       | 5      | 0      | 5      | 0      | 5      | 5      |
| 1968                       | 5      | 0      | 1      | 0      | 5      | 0      |
| 1969                       | 5      | 0      | 5      | 5      | 5      | 0      |
| 1970                       | 0      | 0      | 5      | 0      | 5      | 0      |
| 1971                       | 5      | 5      | 5      | 0      | 0      | 0      |
| 1972                       | 5      | 0      | 5      | 0      | 5      | 5      |
| 1973                       | 5      | 0      | 3      | 0      | 5      | 0      |
| 1974                       | 5      | 0      | 5      | 5      | 4      | 0      |
| 1975                       | 0      | 0      | 4      | 0      | 5      | 0      |
| 1976                       | 5      | 5      | 5      | 0      | 4      | 0      |
| 1977                       | 4      | 0      | 5      | 0      | 5      | 5      |
| 1978                       | 5      | 0      | 0      | 0      | 4      | 0      |
| 1979                       | 4      | 0      | 5      | 5      | 5      | 0      |
| 1980                       | 1      | 0      | 5      | 0      | 5      | 0      |
| 1981                       | 4      | 3      | 5      | 0      | 5      | 0      |
| 1982                       | 4      | 0      | 5      | 0      | 5      | 4      |
| 1983                       | 5      | 0      | 0      | 0      | 5      | 0      |
| 1984                       | 5      | 0      | 7      | 4      | 6      | 0      |
| 1985                       | 4      | 0      | 5      | 0      | 2      | 0      |
| 1986                       | 5      | 5      | 5      | 0      | 5      | 0      |
| 1987                       | 5      | 0      | 4      | 0      | 7      | 4      |
| 1988                       | 7      | 0      | 4      | 0      | 5      | 0      |
| 1989                       | 5      | 0      | 5      | 5      | 5      | 0      |
| 1990                       | 3      | 0      | 5      | 0      | 5      | 0      |
| 1991                       | 4      | 0      | 1      | 0      | 3      | 0      |
| 1992                       | 5      | 0      | 5      | 0      | 5      | 5      |
| 1993                       | 4      | 0      | 0      | 0      | 5      | 0      |
| 1994                       | 5      | 0      | 5      | 5      | 5      | 0      |
| 1995                       | 2      | 0      | 5      | 0      | 5      | 0      |

|      |   |   |   |   |   |   |
|------|---|---|---|---|---|---|
| 1996 | 5 | 5 | 5 | 0 | 5 | 0 |
| 1997 | 4 | 0 | 4 | 0 | 3 | 4 |
| 1998 | 4 | 0 | 3 | 0 | 4 | 0 |
| 1999 | 4 | 0 | 4 | 4 | 1 | 0 |
| 2000 | 2 | 0 | 3 | 0 | 3 | 0 |
| 2001 | 4 | 3 | 3 | 0 | 0 | 0 |
| 2002 | 3 | 0 | 4 | 0 | 2 | 2 |
| 2003 | 3 | 0 | 0 | 0 | 3 | 0 |
| 2004 | 3 | 0 | 4 | 4 | 4 | 0 |
| 2005 | 1 | 0 | 4 | 0 | 4 | 0 |
| 2006 | 1 | 4 | 4 | 0 | 0 | 0 |
| 2007 | 4 | 0 | 4 | 0 | 4 | 4 |
| 2008 | 4 | 0 | 1 | 0 | 4 | 0 |
| 2009 | 4 | 0 | 4 | 4 | 4 | 0 |
| 2010 | 0 | 0 | 4 | 0 | 4 | 0 |
| 2011 | 3 | 4 | 2 | 0 | 0 | 0 |
| 2012 | 4 | 0 | 3 | 0 | 4 | 4 |
| 2013 | 3 | 0 | 0 | 0 | 4 | 0 |
| 2014 | 4 | 0 | 4 | 2 | 3 | 0 |
| 2015 | 0 | 0 | 4 | 0 | 4 | 0 |
| 2016 | 4 | 4 | 3 | 0 | 0 | 0 |
| 2017 | 4 | 0 | 4 | 0 | 3 | 2 |
| 2018 | 0 | 0 | 0 | 0 | 4 | 0 |
| 2019 | 4 | 0 | 4 | 2 | 4 | 0 |
| 2020 | 0 | 0 | 4 | 0 | 4 | 0 |

| Serio - Brembo             |        |        |        |        |        |        |
|----------------------------|--------|--------|--------|--------|--------|--------|
| $\rho_s - 2000-2500$ m asl |        |        |        |        |        |        |
| Date                       | 01-feb | 01-mar | 01-apr | 15-apr | 01-mag | 01-giu |
| 1967                       | 4      | 0      | 4      | 0      | 4      | 4      |
| 1968                       | 3      | 0      | 4      | 0      | 4      | 0      |
| 1969                       | 4      | 0      | 4      | 4      | 4      | 0      |
| 1970                       | 3      | 0      | 4      | 0      | 4      | 0      |
| 1971                       | 4      | 4      | 4      | 0      | 2      | 0      |
| 1972                       | 4      | 0      | 4      | 0      | 3      | 4      |
| 1973                       | 4      | 0      | 4      | 0      | 3      | 0      |
| 1974                       | 4      | 0      | 4      | 4      | 4      | 0      |
| 1975                       | 3      | 0      | 3      | 0      | 3      | 0      |
| 1976                       | 4      | 4      | 4      | 0      | 4      | 0      |
| 1977                       | 4      | 0      | 4      | 0      | 4      | 4      |
| 1978                       | 4      | 0      | 1      | 0      | 4      | 0      |
| 1979                       | 4      | 0      | 4      | 4      | 3      | 0      |
| 1980                       | 4      | 0      | 4      | 0      | 4      | 0      |
| 1981                       | 3      | 3      | 4      | 0      | 4      | 0      |
| 1982                       | 4      | 0      | 4      | 0      | 4      | 4      |
| 1983                       | 4      | 0      | 1      | 0      | 4      | 0      |
| 1984                       | 4      | 0      | 2      | 4      | 3      | 0      |
| 1985                       | 4      | 0      | 3      | 0      | 2      | 0      |
| 1986                       | 3      | 3      | 2      | 0      | 4      | 0      |
| 1987                       | 3      | 0      | 4      | 0      | 3      | 4      |
| 1988                       | 2      | 0      | 4      | 0      | 4      | 0      |
| 1989                       | 4      | 0      | 4      | 4      | 4      | 0      |
| 1990                       | 4      | 0      | 4      | 0      | 4      | 0      |
| 1991                       | 4      | 2      | 4      | 0      | 4      | 0      |
| 1992                       | 4      | 0      | 4      | 0      | 4      | 4      |
| 1993                       | 4      | 0      | 3      | 0      | 4      | 0      |
| 1994                       | 4      | 0      | 4      | 4      | 4      | 0      |
| 1995                       | 4      | 0      | 4      | 0      | 4      | 0      |

|      |   |   |   |   |   |   |
|------|---|---|---|---|---|---|
| 1996 | 4 | 4 | 4 | 0 | 4 | 0 |
| 1997 | 4 | 0 | 4 | 0 | 3 | 4 |
| 1998 | 4 | 0 | 4 | 0 | 4 | 0 |
| 1999 | 4 | 0 | 4 | 4 | 1 | 0 |
| 2000 | 3 | 0 | 2 | 0 | 3 | 0 |
| 2001 | 4 | 4 | 4 | 0 | 2 | 0 |
| 2002 | 2 | 0 | 4 | 0 | 3 | 1 |
| 2003 | 4 | 0 | 0 | 0 | 2 | 0 |
| 2004 | 4 | 0 | 4 | 4 | 4 | 0 |
| 2005 | 4 | 0 | 4 | 0 | 4 | 0 |
| 2006 | 4 | 4 | 4 | 0 | 0 | 0 |
| 2007 | 4 | 0 | 4 | 0 | 4 | 4 |
| 2008 | 4 | 0 | 2 | 0 | 3 | 0 |
| 2009 | 3 | 0 | 4 | 4 | 4 | 0 |
| 2010 | 1 | 0 | 4 | 0 | 4 | 0 |
| 2011 | 3 | 4 | 3 | 0 | 0 | 0 |
| 2012 | 4 | 0 | 4 | 0 | 4 | 4 |
| 2013 | 4 | 0 | 0 | 0 | 3 | 0 |
| 2014 | 4 | 0 | 4 | 2 | 4 | 0 |
| 2015 | 1 | 0 | 4 | 0 | 4 | 0 |
| 2016 | 4 | 4 | 4 | 0 | 1 | 0 |
| 2017 | 4 | 0 | 4 | 0 | 4 | 3 |
| 2018 | 1 | 0 | 1 | 0 | 4 | 0 |
| 2019 | 4 | 0 | 4 | 2 | 4 | 0 |
| 2020 | 1 | 0 | 4 | 0 | 4 | 0 |



| Serio - Brembo             |        |        |        |        |        |        |
|----------------------------|--------|--------|--------|--------|--------|--------|
| $\rho_s - 2500-3000$ m asl |        |        |        |        |        |        |
| Date                       | 01-feb | 01-mar | 01-apr | 15-apr | 01-mag | 01-giu |
| 1967                       | 0      | 0      | 0      | 0      | 0      | 0      |
| 1968                       | 0      | 0      | 0      | 0      | 0      | 0      |
| 1969                       | 0      | 0      | 0      | 0      | 0      | 0      |
| 1970                       | 0      | 0      | 0      | 0      | 0      | 0      |
| 1971                       | 0      | 0      | 0      | 0      | 0      | 0      |
| 1972                       | 0      | 0      | 0      | 0      | 0      | 0      |
| 1973                       | 0      | 0      | 0      | 0      | 0      | 0      |
| 1974                       | 0      | 0      | 0      | 0      | 0      | 0      |
| 1975                       | 0      | 0      | 0      | 0      | 0      | 0      |
| 1976                       | 0      | 0      | 0      | 0      | 0      | 0      |
| 1977                       | 0      | 0      | 0      | 0      | 0      | 0      |
| 1978                       | 0      | 0      | 0      | 0      | 0      | 0      |
| 1979                       | 0      | 0      | 0      | 0      | 0      | 0      |
| 1980                       | 0      | 0      | 0      | 0      | 0      | 0      |
| 1981                       | 0      | 0      | 0      | 0      | 0      | 0      |
| 1982                       | 0      | 0      | 0      | 0      | 0      | 0      |
| 1983                       | 0      | 0      | 0      | 0      | 0      | 0      |
| 1984                       | 0      | 0      | 0      | 0      | 0      | 0      |
| 1985                       | 0      | 0      | 0      | 0      | 0      | 0      |
| 1986                       | 0      | 0      | 0      | 0      | 0      | 0      |
| 1987                       | 0      | 0      | 0      | 0      | 0      | 0      |
| 1988                       | 0      | 0      | 0      | 0      | 0      | 0      |
| 1989                       | 0      | 0      | 0      | 0      | 0      | 0      |
| 1990                       | 0      | 0      | 0      | 0      | 0      | 0      |
| 1991                       | 0      | 0      | 0      | 0      | 0      | 0      |
| 1992                       | 0      | 0      | 0      | 0      | 0      | 0      |
| 1993                       | 0      | 0      | 0      | 0      | 0      | 0      |
| 1994                       | 0      | 0      | 0      | 0      | 0      | 0      |
| 1995                       | 0      | 0      | 0      | 0      | 0      | 0      |

|      |   |   |   |   |   |   |
|------|---|---|---|---|---|---|
| 1996 | 0 | 0 | 0 | 0 | 0 | 0 |
| 1997 | 0 | 0 | 0 | 0 | 0 | 0 |
| 1998 | 0 | 0 | 0 | 0 | 0 | 0 |
| 1999 | 0 | 0 | 0 | 0 | 0 | 0 |
| 2000 | 0 | 0 | 0 | 0 | 0 | 0 |
| 2001 | 0 | 0 | 0 | 0 | 0 | 0 |
| 2002 | 0 | 0 | 0 | 0 | 0 | 0 |
| 2003 | 0 | 0 | 0 | 0 | 0 | 0 |
| 2004 | 0 | 0 | 0 | 0 | 0 | 0 |
| 2005 | 0 | 0 | 0 | 0 | 0 | 0 |
| 2006 | 0 | 0 | 0 | 0 | 0 | 0 |
| 2007 | 0 | 0 | 0 | 0 | 0 | 0 |
| 2008 | 0 | 0 | 0 | 0 | 0 | 0 |
| 2009 | 0 | 0 | 0 | 0 | 0 | 0 |
| 2010 | 0 | 0 | 0 | 0 | 0 | 0 |
| 2011 | 0 | 0 | 0 | 0 | 0 | 0 |
| 2012 | 1 | 1 | 0 | 1 | 1 | 1 |
| 2013 | 1 | 1 | 0 | 0 | 0 | 0 |
| 2014 | 0 | 0 | 0 | 0 | 0 | 0 |
| 2015 | 0 | 0 | 0 | 0 | 0 | 0 |
| 2016 | 0 | 0 | 0 | 0 | 0 | 0 |
| 2017 | 0 | 0 | 0 | 0 | 0 | 0 |
| 2018 | 0 | 0 | 0 | 0 | 0 | 0 |
| 2019 | 0 | 0 | 0 | 0 | 0 | 0 |
| 2020 | 0 | 0 | 0 | 0 | 0 | 0 |

| Adda                               |        |        |        |        |        |        |
|------------------------------------|--------|--------|--------|--------|--------|--------|
| $\rho_s - 1000-1500 \text{ m asl}$ |        |        |        |        |        |        |
| Date                               | 01-feb | 01-mar | 01-apr | 15-apr | 01-mag | 01-giu |
| 1967                               | 0      | 0      | 0      | 0      | 0      | 0      |
| 1968                               | 0      | 0      | 0      | 0      | 0      | 0      |
| 1969                               | 0      | 0      | 0      | 0      | 0      | 0      |
| 1970                               | 0      | 0      | 0      | 0      | 0      | 0      |
| 1971                               | 0      | 0      | 0      | 0      | 0      | 0      |
| 1972                               | 0      | 0      | 0      | 0      | 0      | 0      |
| 1973                               | 0      | 0      | 0      | 0      | 0      | 0      |
| 1974                               | 0      | 0      | 0      | 0      | 0      | 0      |
| 1975                               | 0      | 0      | 0      | 0      | 0      | 0      |
| 1976                               | 0      | 0      | 0      | 0      | 0      | 0      |
| 1977                               | 0      | 0      | 0      | 0      | 0      | 0      |
| 1978                               | 0      | 0      | 0      | 0      | 0      | 0      |
| 1979                               | 0      | 0      | 0      | 0      | 0      | 0      |
| 1980                               | 0      | 0      | 0      | 0      | 0      | 0      |
| 1981                               | 0      | 0      | 0      | 0      | 0      | 0      |
| 1982                               | 0      | 0      | 0      | 0      | 0      | 0      |
| 1983                               | 0      | 0      | 0      | 0      | 0      | 0      |
| 1984                               | 0      | 0      | 0      | 0      | 0      | 0      |
| 1985                               | 0      | 0      | 0      | 0      | 0      | 0      |
| 1986                               | 0      | 0      | 0      | 0      | 0      | 0      |
| 1987                               | 0      | 0      | 0      | 0      | 0      | 0      |
| 1988                               | 0      | 0      | 0      | 0      | 0      | 0      |
| 1989                               | 0      | 0      | 0      | 0      | 0      | 0      |
| 1990                               | 0      | 0      | 0      | 0      | 0      | 0      |
| 1991                               | 0      | 0      | 0      | 0      | 0      | 0      |
| 1992                               | 0      | 0      | 0      | 0      | 0      | 0      |
| 1993                               | 0      | 0      | 0      | 0      | 0      | 0      |
| 1994                               | 0      | 0      | 0      | 0      | 0      | 0      |
| 1995                               | 0      | 0      | 0      | 0      | 0      | 0      |

|      |   |   |   |   |   |   |
|------|---|---|---|---|---|---|
| 1996 | 0 | 0 | 0 | 0 | 0 | 0 |
| 1997 | 0 | 0 | 0 | 0 | 0 | 0 |
| 1998 | 0 | 0 | 0 | 0 | 0 | 0 |
| 1999 | 0 | 0 | 0 | 0 | 0 | 0 |
| 2000 | 0 | 0 | 0 | 0 | 0 | 0 |
| 2001 | 0 | 0 | 0 | 0 | 0 | 0 |
| 2002 | 0 | 0 | 0 | 0 | 0 | 0 |
| 2003 | 0 | 0 | 0 | 0 | 0 | 0 |
| 2004 | 0 | 0 | 0 | 0 | 0 | 0 |
| 2005 | 0 | 0 | 0 | 0 | 0 | 0 |
| 2006 | 0 | 0 | 0 | 0 | 0 | 0 |
| 2007 | 0 | 0 | 0 | 0 | 0 | 0 |
| 2008 | 0 | 0 | 0 | 0 | 0 | 0 |
| 2009 | 0 | 0 | 0 | 0 | 0 | 0 |
| 2010 | 0 | 0 | 0 | 0 | 0 | 0 |
| 2011 | 0 | 0 | 0 | 0 | 0 | 0 |
| 2012 | 0 | 0 | 0 | 0 | 0 | 0 |
| 2013 | 0 | 0 | 0 | 0 | 0 | 0 |
| 2014 | 0 | 0 | 0 | 0 | 0 | 0 |
| 2015 | 0 | 0 | 0 | 0 | 0 | 0 |
| 2016 | 0 | 0 | 0 | 0 | 0 | 0 |
| 2017 | 0 | 0 | 0 | 0 | 0 | 0 |
| 2018 | 0 | 0 | 0 | 0 | 0 | 0 |
| 2019 | 0 | 0 | 0 | 0 | 0 | 0 |
| 2020 | 0 | 0 | 0 | 0 | 0 | 0 |

| Adda                               |        |        |        |        |        |        |
|------------------------------------|--------|--------|--------|--------|--------|--------|
| $\rho_s - 1500-2000 \text{ m asl}$ |        |        |        |        |        |        |
| Date                               | 01-feb | 01-mar | 01-apr | 15-apr | 01-mag | 01-giu |
| 1967                               | 4      | 4      | 4      | 4      | 4      | 1      |
| 1968                               | 4      | 4      | 4      | 4      | 4      | 0      |
| 1969                               | 4      | 4      | 4      | 4      | 4      | 0      |
| 1970                               | 4      | 4      | 4      | 4      | 4      | 1      |
| 1971                               | 4      | 4      | 4      | 4      | 3      | 0      |
| 1972                               | 4      | 4      | 4      | 4      | 4      | 3      |
| 1973                               | 4      | 4      | 4      | 4      | 4      | 0      |
| 1974                               | 4      | 3      | 4      | 4      | 4      | 1      |
| 1975                               | 4      | 4      | 4      | 3      | 4      | 3      |
| 1976                               | 3      | 4      | 4      | 4      | 4      | 0      |
| 1977                               | 4      | 3      | 4      | 4      | 4      | 4      |
| 1978                               | 3      | 3      | 4      | 4      | 3      | 3      |
| 1979                               | 3      | 4      | 4      | 4      | 4      | 3      |
| 1980                               | 4      | 4      | 4      | 4      | 4      | 2      |
| 1981                               | 4      | 4      | 4      | 0      | 3      | 0      |
| 1982                               | 4      | 4      | 4      | 4      | 1      | 0      |
| 1983                               | 4      | 4      | 4      | 4      | 4      | 0      |
| 1984                               | 4      | 4      | 4      | 4      | 4      | 4      |
| 1985                               | 0      | 0      | 0      | 0      | 0      | 0      |
| 1986                               | 0      | 0      | 0      | 0      | 0      | 0      |
| 1987                               | 0      | 0      | 0      | 0      | 0      | 0      |
| 1988                               | 0      | 0      | 0      | 0      | 0      | 0      |
| 1989                               | 0      | 0      | 0      | 0      | 0      | 0      |
| 1990                               | 0      | 0      | 0      | 0      | 0      | 0      |
| 1991                               | 0      | 0      | 0      | 0      | 0      | 0      |
| 1992                               | 0      | 0      | 0      | 0      | 0      | 0      |
| 1993                               | 0      | 0      | 0      | 0      | 0      | 0      |
| 1994                               | 0      | 0      | 0      | 0      | 0      | 0      |
| 1995                               | 0      | 0      | 0      | 0      | 0      | 0      |

|      |   |   |   |   |   |   |
|------|---|---|---|---|---|---|
| 1996 | 0 | 0 | 0 | 0 | 0 | 0 |
| 1997 | 0 | 0 | 0 | 0 | 0 | 0 |
| 1998 | 0 | 0 | 0 | 0 | 0 | 0 |
| 1999 | 0 | 0 | 0 | 0 | 0 | 0 |
| 2000 | 0 | 0 | 0 | 0 | 0 | 0 |
| 2001 | 0 | 0 | 0 | 0 | 0 | 0 |
| 2002 | 0 | 0 | 0 | 0 | 0 | 0 |
| 2003 | 0 | 0 | 0 | 0 | 0 | 0 |
| 2004 | 0 | 0 | 0 | 0 | 0 | 0 |
| 2005 | 0 | 0 | 0 | 3 | 0 | 0 |
| 2006 | 0 | 0 | 0 | 0 | 0 | 0 |
| 2007 | 4 | 4 | 4 | 2 | 0 | 0 |
| 2008 | 0 | 0 | 0 | 0 | 0 | 0 |
| 2009 | 2 | 4 | 4 | 4 | 4 | 0 |
| 2010 | 4 | 4 | 2 | 4 | 4 | 0 |
| 2011 | 4 | 4 | 4 | 4 | 0 | 0 |
| 2012 | 5 | 4 | 4 | 5 | 4 | 0 |
| 2013 | 5 | 5 | 5 | 5 | 2 | 0 |
| 2014 | 1 | 3 | 3 | 5 | 3 | 3 |
| 2015 | 4 | 2 | 5 | 5 | 1 | 0 |
| 2016 | 4 | 3 | 4 | 2 | 1 | 0 |
| 2017 | 2 | 3 | 3 | 0 | 2 | 0 |
| 2018 | 5 | 4 | 4 | 4 | 3 | 0 |
| 2019 | 4 | 4 | 4 | 3 | 3 | 0 |
| 2020 | 4 | 2 | 2 | 3 | 2 | 0 |

| Adda                               |        |        |        |        |        |        |
|------------------------------------|--------|--------|--------|--------|--------|--------|
| $\rho_s - 2000-2500 \text{ m asl}$ |        |        |        |        |        |        |
| Date                               | 01-feb | 01-mar | 01-apr | 15-apr | 01-mag | 01-giu |
| 1967                               | 2      | 2      | 2      | 2      | 2      | 1      |
| 1968                               | 2      | 2      | 2      | 2      | 2      | 2      |
| 1969                               | 2      | 2      | 2      | 2      | 2      | 0      |
| 1970                               | 2      | 1      | 2      | 2      | 2      | 1      |
| 1971                               | 2      | 2      | 2      | 2      | 2      | 2      |
| 1972                               | 5      | 5      | 5      | 5      | 5      | 1      |
| 1973                               | 5      | 5      | 5      | 5      | 5      | 0      |
| 1974                               | 5      | 5      | 5      | 5      | 5      | 1      |
| 1975                               | 5      | 5      | 5      | 3      | 5      | 5      |
| 1976                               | 5      | 5      | 5      | 5      | 5      | 2      |
| 1977                               | 5      | 2      | 5      | 5      | 5      | 5      |
| 1978                               | 2      | 5      | 5      | 5      | 5      | 5      |
| 1979                               | 5      | 5      | 5      | 5      | 5      | 5      |
| 1980                               | 5      | 5      | 5      | 5      | 5      | 5      |
| 1981                               | 5      | 5      | 5      | 3      | 4      | 3      |
| 1982                               | 5      | 5      | 5      | 5      | 5      | 2      |
| 1983                               | 5      | 5      | 5      | 5      | 5      | 4      |
| 1984                               | 5      | 5      | 5      | 5      | 5      | 5      |
| 1985                               | 0      | 0      | 0      | 0      | 0      | 0      |
| 1986                               | 0      | 0      | 0      | 0      | 0      | 0      |
| 1987                               | 0      | 0      | 0      | 0      | 0      | 0      |
| 1988                               | 0      | 0      | 0      | 0      | 0      | 0      |
| 1989                               | 0      | 0      | 0      | 0      | 0      | 0      |
| 1990                               | 0      | 0      | 0      | 0      | 0      | 0      |
| 1991                               | 0      | 0      | 0      | 0      | 0      | 0      |
| 1992                               | 0      | 0      | 0      | 0      | 0      | 0      |
| 1993                               | 0      | 0      | 0      | 0      | 0      | 0      |
| 1994                               | 0      | 0      | 0      | 0      | 0      | 0      |
| 1995                               | 0      | 0      | 0      | 0      | 0      | 0      |

|      |    |   |    |   |   |   |
|------|----|---|----|---|---|---|
| 1996 | 0  | 0 | 0  | 0 | 0 | 0 |
| 1997 | 0  | 0 | 0  | 0 | 0 | 0 |
| 1998 | 0  | 0 | 0  | 0 | 0 | 0 |
| 1999 | 0  | 0 | 0  | 0 | 0 | 0 |
| 2000 | 0  | 0 | 0  | 0 | 0 | 0 |
| 2001 | 0  | 0 | 0  | 0 | 0 | 0 |
| 2002 | 0  | 0 | 0  | 0 | 0 | 0 |
| 2003 | 0  | 0 | 0  | 0 | 0 | 0 |
| 2004 | 0  | 0 | 0  | 0 | 0 | 0 |
| 2005 | 0  | 0 | 0  | 4 | 0 | 0 |
| 2006 | 0  | 0 | 0  | 0 | 0 | 0 |
| 2007 | 5  | 5 | 5  | 1 | 1 | 0 |
| 2008 | 0  | 0 | 0  | 0 | 0 | 0 |
| 2009 | 4  | 5 | 5  | 5 | 5 | 2 |
| 2010 | 6  | 8 | 7  | 7 | 7 | 5 |
| 2011 | 6  | 6 | 6  | 6 | 5 | 0 |
| 2012 | 9  | 8 | 6  | 8 | 9 | 0 |
| 2013 | 9  | 7 | 8  | 7 | 4 | 2 |
| 2014 | 0  | 8 | 8  | 8 | 3 | 2 |
| 2015 | 8  | 8 | 9  | 9 | 7 | 0 |
| 2016 | 9  | 4 | 10 | 2 | 1 | 1 |
| 2017 | 3  | 5 | 7  | 4 | 1 | 1 |
| 2018 | 10 | 8 | 9  | 9 | 8 | 1 |
| 2019 | 7  | 9 | 9  | 5 | 9 | 2 |
| 2020 | 10 | 2 | 2  | 3 | 2 | 0 |



| Adda                               |        |        |        |        |        |        |
|------------------------------------|--------|--------|--------|--------|--------|--------|
| $\rho_s - 2500-3000 \text{ m asl}$ |        |        |        |        |        |        |
| Date                               | 01-feb | 01-mar | 01-apr | 15-apr | 01-mag | 01-giu |
| 1967                               | 0      | 0      | 0      | 0      | 0      | 0      |
| 1968                               | 0      | 0      | 0      | 0      | 0      | 0      |
| 1969                               | 0      | 0      | 0      | 0      | 0      | 0      |
| 1970                               | 0      | 0      | 0      | 0      | 0      | 0      |
| 1971                               | 0      | 0      | 0      | 0      | 0      | 0      |
| 1972                               | 0      | 0      | 0      | 0      | 0      | 0      |
| 1973                               | 0      | 0      | 0      | 0      | 0      | 0      |
| 1974                               | 0      | 0      | 0      | 0      | 0      | 0      |
| 1975                               | 0      | 0      | 0      | 0      | 0      | 0      |
| 1976                               | 0      | 0      | 0      | 0      | 0      | 0      |
| 1977                               | 0      | 0      | 0      | 0      | 0      | 0      |
| 1978                               | 0      | 0      | 0      | 0      | 0      | 0      |
| 1979                               | 0      | 0      | 0      | 0      | 0      | 0      |
| 1980                               | 0      | 0      | 0      | 0      | 0      | 0      |
| 1981                               | 0      | 0      | 0      | 0      | 0      | 0      |
| 1982                               | 0      | 0      | 0      | 0      | 0      | 0      |
| 1983                               | 0      | 0      | 0      | 0      | 0      | 0      |
| 1984                               | 0      | 0      | 0      | 0      | 0      | 0      |
| 1985                               | 0      | 0      | 0      | 0      | 0      | 0      |
| 1986                               | 0      | 0      | 0      | 0      | 0      | 0      |
| 1987                               | 0      | 0      | 0      | 0      | 0      | 0      |
| 1988                               | 0      | 0      | 0      | 0      | 0      | 0      |
| 1989                               | 0      | 0      | 0      | 0      | 0      | 0      |
| 1990                               | 0      | 0      | 0      | 0      | 0      | 0      |
| 1991                               | 0      | 0      | 0      | 0      | 0      | 0      |
| 1992                               | 0      | 0      | 0      | 0      | 0      | 0      |
| 1993                               | 0      | 0      | 0      | 0      | 0      | 0      |
| 1994                               | 0      | 0      | 0      | 0      | 0      | 0      |
| 1995                               | 0      | 0      | 0      | 0      | 0      | 0      |

|      |   |   |   |   |   |   |
|------|---|---|---|---|---|---|
| 1996 | 0 | 0 | 0 | 0 | 0 | 0 |
| 1997 | 0 | 0 | 0 | 0 | 0 | 0 |
| 1998 | 0 | 0 | 0 | 0 | 0 | 0 |
| 1999 | 0 | 0 | 0 | 0 | 0 | 0 |
| 2000 | 0 | 0 | 0 | 0 | 0 | 0 |
| 2001 | 0 | 0 | 0 | 0 | 0 | 0 |
| 2002 | 0 | 0 | 0 | 0 | 0 | 0 |
| 2003 | 0 | 0 | 0 | 0 | 0 | 0 |
| 2004 | 0 | 0 | 0 | 0 | 0 | 0 |
| 2005 | 0 | 0 | 0 | 0 | 0 | 0 |
| 2006 | 0 | 0 | 0 | 0 | 0 | 0 |
| 2007 | 0 | 0 | 0 | 0 | 0 | 0 |
| 2008 | 0 | 0 | 0 | 0 | 0 | 0 |
| 2009 | 0 | 0 | 0 | 0 | 0 | 0 |
| 2010 | 0 | 0 | 0 | 0 | 0 | 0 |
| 2011 | 0 | 0 | 0 | 0 | 0 | 0 |
| 2012 | 0 | 0 | 0 | 0 | 0 | 0 |
| 2013 | 0 | 0 | 0 | 0 | 0 | 0 |
| 2014 | 0 | 0 | 0 | 0 | 0 | 0 |
| 2015 | 0 | 0 | 0 | 0 | 0 | 0 |
| 2016 | 0 | 0 | 0 | 0 | 0 | 0 |
| 2017 | 0 | 0 | 0 | 0 | 0 | 0 |
| 2018 | 0 | 0 | 0 | 0 | 0 | 0 |
| 2019 | 0 | 0 | 0 | 0 | 0 | 0 |
| 2020 | 0 | 0 | 0 | 0 | 0 | 0 |

| Toce                               |        |        |        |        |        |        |
|------------------------------------|--------|--------|--------|--------|--------|--------|
| $\rho_s - 1000-1500 \text{ m asl}$ |        |        |        |        |        |        |
| Date                               | 01-feb | 01-mar | 01-apr | 15-apr | 01-mag | 01-giu |
| 1967                               | 0      | 0      | 0      | 0      | 0      | 0      |
| 1968                               | 0      | 0      | 0      | 0      | 0      | 0      |
| 1969                               | 0      | 0      | 0      | 0      | 0      | 0      |
| 1970                               | 0      | 0      | 0      | 0      | 0      | 0      |
| 1971                               | 0      | 0      | 0      | 0      | 0      | 0      |
| 1972                               | 0      | 0      | 0      | 0      | 0      | 0      |
| 1973                               | 0      | 0      | 0      | 0      | 0      | 0      |
| 1974                               | 0      | 0      | 0      | 0      | 0      | 0      |
| 1975                               | 0      | 0      | 0      | 0      | 0      | 0      |
| 1976                               | 0      | 0      | 0      | 0      | 0      | 0      |
| 1977                               | 0      | 0      | 0      | 0      | 0      | 0      |
| 1978                               | 0      | 0      | 0      | 0      | 0      | 0      |
| 1979                               | 0      | 0      | 0      | 0      | 0      | 0      |
| 1980                               | 0      | 0      | 0      | 0      | 0      | 0      |
| 1981                               | 0      | 0      | 0      | 0      | 0      | 0      |
| 1982                               | 0      | 0      | 0      | 0      | 0      | 0      |
| 1983                               | 0      | 0      | 0      | 0      | 0      | 0      |
| 1984                               | 0      | 0      | 0      | 0      | 0      | 0      |
| 1985                               | 0      | 0      | 0      | 0      | 0      | 0      |
| 1986                               | 0      | 0      | 0      | 0      | 0      | 0      |
| 1987                               | 0      | 0      | 0      | 0      | 0      | 0      |
| 1988                               | 0      | 0      | 0      | 0      | 0      | 0      |
| 1989                               | 0      | 0      | 0      | 0      | 0      | 0      |
| 1990                               | 0      | 0      | 0      | 0      | 0      | 0      |
| 1991                               | 0      | 0      | 0      | 0      | 0      | 0      |
| 1992                               | 0      | 0      | 0      | 0      | 0      | 0      |
| 1993                               | 0      | 0      | 0      | 0      | 0      | 0      |
| 1994                               | 0      | 0      | 0      | 0      | 0      | 0      |
| 1995                               | 0      | 0      | 0      | 0      | 0      | 0      |

|      |   |   |   |   |   |   |
|------|---|---|---|---|---|---|
| 1996 | 0 | 0 | 0 | 0 | 0 | 0 |
| 1997 | 0 | 0 | 0 | 0 | 0 | 0 |
| 1998 | 0 | 0 | 0 | 0 | 0 | 0 |
| 1999 | 0 | 0 | 0 | 0 | 0 | 0 |
| 2000 | 0 | 0 | 0 | 0 | 0 | 0 |
| 2001 | 0 | 0 | 0 | 0 | 0 | 0 |
| 2002 | 0 | 0 | 0 | 0 | 0 | 0 |
| 2003 | 0 | 0 | 0 | 0 | 0 | 0 |
| 2004 | 0 | 0 | 0 | 0 | 0 | 0 |
| 2005 | 0 | 0 | 0 | 0 | 0 | 0 |
| 2006 | 0 | 0 | 0 | 0 | 0 | 0 |
| 2007 | 0 | 0 | 0 | 0 | 0 | 0 |
| 2008 | 0 | 0 | 0 | 0 | 0 | 0 |
| 2009 | 0 | 0 | 0 | 0 | 0 | 0 |
| 2010 | 0 | 0 | 0 | 0 | 0 | 0 |
| 2011 | 0 | 0 | 0 | 0 | 0 | 0 |
| 2012 | 0 | 0 | 0 | 0 | 0 | 0 |
| 2013 | 0 | 0 | 0 | 0 | 0 | 0 |
| 2014 | 0 | 0 | 0 | 0 | 0 | 0 |
| 2015 | 0 | 0 | 0 | 0 | 0 | 0 |
| 2016 | 0 | 0 | 0 | 0 | 0 | 0 |
| 2017 | 0 | 0 | 0 | 0 | 0 | 0 |
| 2018 | 0 | 0 | 0 | 0 | 0 | 0 |
| 2019 | 0 | 0 | 0 | 0 | 0 | 0 |
| 2020 | 0 | 0 | 0 | 0 | 0 | 0 |

| Toce                       |        |        |        |        |        |        |
|----------------------------|--------|--------|--------|--------|--------|--------|
| $\rho_s - 1500-2000$ m asl |        |        |        |        |        |        |
| Date                       | 01-feb | 01-mar | 01-apr | 15-apr | 01-mag | 01-giu |
| 1967                       | 0      | 0      | 0      | 0      | 0      | 0      |
| 1968                       | 0      | 0      | 0      | 0      | 0      | 0      |
| 1969                       | 0      | 0      | 0      | 0      | 0      | 0      |
| 1970                       | 0      | 0      | 2      | 0      | 3      | 0      |
| 1971                       | 3      | 3      | 3      | 0      | 0      | 0      |
| 1972                       | 3      | 0      | 3      | 0      | 2      | 1      |
| 1973                       | 2      | 0      | 1      | 0      | 3      | 0      |
| 1974                       | 3      | 0      | 3      | 1      | 2      | 0      |
| 1975                       | 2      | 0      | 3      | 0      | 1      | 0      |
| 1976                       | 3      | 3      | 3      | 0      | 3      | 0      |
| 1977                       | 3      | 0      | 3      | 0      | 3      | 3      |
| 1978                       | 3      | 0      | 0      | 0      | 3      | 0      |
| 1979                       | 3      | 0      | 3      | 3      | 3      | 0      |
| 1980                       | 2      | 0      | 3      | 0      | 3      | 0      |
| 1981                       | 3      | 0      | 1      | 0      | 0      | 0      |
| 1982                       | 3      | 0      | 0      | 0      | 3      | 0      |
| 1983                       | 0      | 0      | 0      | 0      | 1      | 0      |
| 1984                       | 1      | 0      | 1      | 1      | 1      | 0      |
| 1985                       | 0      | 0      | 3      | 0      | 3      | 0      |
| 1986                       | 3      | 3      | 3      | 0      | 2      | 0      |
| 1987                       | 3      | 0      | 3      | 0      | 3      | 3      |
| 1988                       | 3      | 0      | 1      | 0      | 3      | 0      |
| 1989                       | 3      | 0      | 3      | 3      | 3      | 0      |
| 1990                       | 1      | 0      | 3      | 0      | 3      | 0      |
| 1991                       | 2      | 2      | 2      | 0      | 2      | 0      |
| 1992                       | 3      | 0      | 3      | 0      | 3      | 3      |
| 1993                       | 3      | 0      | 1      | 0      | 2      | 0      |
| 1994                       | 3      | 0      | 3      | 3      | 3      | 0      |
| 1995                       | 1      | 0      | 3      | 0      | 3      | 0      |

|      |   |   |   |   |   |   |
|------|---|---|---|---|---|---|
| 1996 | 3 | 3 | 3 | 0 | 2 | 0 |
| 1997 | 3 | 0 | 2 | 0 | 3 | 3 |
| 1998 | 3 | 0 | 2 | 0 | 0 | 0 |
| 1999 | 0 | 0 | 0 | 0 | 0 | 0 |
| 2000 | 0 | 0 | 0 | 0 | 0 | 0 |
| 2001 | 0 | 0 | 0 | 0 | 0 | 0 |
| 2002 | 0 | 0 | 0 | 0 | 0 | 0 |
| 2003 | 0 | 0 | 0 | 0 | 0 | 0 |
| 2004 | 0 | 0 | 0 | 0 | 0 | 0 |
| 2005 | 0 | 0 | 0 | 0 | 0 | 0 |
| 2006 | 0 | 0 | 0 | 0 | 0 | 0 |
| 2007 | 0 | 0 | 0 | 0 | 0 | 0 |
| 2008 | 0 | 0 | 0 | 0 | 0 | 0 |
| 2009 | 0 | 0 | 0 | 0 | 0 | 0 |
| 2010 | 0 | 0 | 0 | 0 | 0 | 0 |
| 2011 | 0 | 0 | 0 | 0 | 0 | 0 |
| 2012 | 0 | 0 | 0 | 0 | 0 | 0 |
| 2013 | 0 | 0 | 0 | 0 | 0 | 0 |
| 2014 | 0 | 0 | 0 | 0 | 0 | 0 |
| 2015 | 0 | 0 | 0 | 0 | 0 | 0 |
| 2016 | 0 | 0 | 0 | 0 | 0 | 0 |
| 2017 | 0 | 0 | 0 | 0 | 0 | 0 |
| 2018 | 0 | 0 | 0 | 0 | 0 | 0 |
| 2019 | 0 | 0 | 0 | 0 | 0 | 0 |
| 2020 | 0 | 0 | 0 | 0 | 0 | 0 |

| Toce                               |        |        |        |        |        |        |
|------------------------------------|--------|--------|--------|--------|--------|--------|
| $\rho_s - 2000-2500 \text{ m asl}$ |        |        |        |        |        |        |
| Date                               | 01-feb | 01-mar | 01-apr | 15-apr | 01-mag | 01-giu |
| 1967                               | 0      | 0      | 0      | 0      | 0      | 0      |
| 1968                               | 0      | 0      | 0      | 0      | 0      | 0      |
| 1969                               | 0      | 0      | 0      | 0      | 0      | 0      |
| 1970                               | 0      | 0      | 6      | 0      | 7      | 0      |
| 1971                               | 8      | 8      | 8      | 0      | 7      | 0      |
| 1972                               | 8      | 0      | 6      | 0      | 6      | 2      |
| 1973                               | 6      | 0      | 6      | 0      | 8      | 0      |
| 1974                               | 6      | 0      | 8      | 0      | 8      | 0      |
| 1975                               | 6      | 0      | 8      | 0      | 2      | 0      |
| 1976                               | 8      | 8      | 8      | 0      | 8      | 0      |
| 1977                               | 8      | 0      | 8      | 0      | 8      | 7      |
| 1978                               | 8      | 0      | 8      | 0      | 8      | 0      |
| 1979                               | 8      | 0      | 8      | 8      | 8      | 0      |
| 1980                               | 8      | 0      | 8      | 0      | 8      | 0      |
| 1981                               | 8      | 0      | 6      | 0      | 6      | 0      |
| 1982                               | 8      | 0      | 0      | 0      | 8      | 0      |
| 1983                               | 0      | 0      | 0      | 0      | 4      | 0      |
| 1984                               | 4      | 0      | 4      | 4      | 4      | 0      |
| 1985                               | 4      | 0      | 8      | 0      | 8      | 0      |
| 1986                               | 8      | 8      | 8      | 0      | 8      | 0      |
| 1987                               | 8      | 0      | 8      | 0      | 8      | 8      |
| 1988                               | 8      | 0      | 8      | 0      | 8      | 0      |
| 1989                               | 8      | 0      | 8      | 8      | 8      | 0      |
| 1990                               | 8      | 0      | 8      | 0      | 8      | 0      |
| 1991                               | 8      | 8      | 8      | 0      | 8      | 0      |
| 1992                               | 7      | 0      | 8      | 0      | 8      | 8      |
| 1993                               | 8      | 0      | 6      | 0      | 8      | 0      |
| 1994                               | 8      | 0      | 8      | 8      | 8      | 0      |
| 1995                               | 8      | 0      | 8      | 0      | 8      | 0      |

|      |   |   |   |   |   |   |
|------|---|---|---|---|---|---|
| 1996 | 8 | 8 | 8 | 0 | 8 | 0 |
| 1997 | 8 | 0 | 8 | 0 | 8 | 8 |
| 1998 | 8 | 0 | 8 | 0 | 0 | 0 |
| 1999 | 0 | 0 | 0 | 0 | 0 | 0 |
| 2000 | 0 | 0 | 0 | 0 | 0 | 0 |
| 2001 | 0 | 0 | 0 | 0 | 0 | 0 |
| 2002 | 0 | 0 | 0 | 0 | 0 | 0 |
| 2003 | 0 | 0 | 0 | 0 | 0 | 0 |
| 2004 | 0 | 0 | 0 | 0 | 0 | 0 |
| 2005 | 0 | 0 | 0 | 0 | 0 | 0 |
| 2006 | 0 | 0 | 0 | 0 | 0 | 0 |
| 2007 | 0 | 0 | 0 | 0 | 0 | 0 |
| 2008 | 0 | 0 | 0 | 0 | 0 | 0 |
| 2009 | 0 | 0 | 0 | 0 | 0 | 0 |
| 2010 | 0 | 0 | 0 | 0 | 0 | 0 |
| 2011 | 0 | 0 | 0 | 0 | 0 | 0 |
| 2012 | 0 | 0 | 0 | 0 | 0 | 0 |
| 2013 | 0 | 0 | 0 | 0 | 0 | 0 |
| 2014 | 0 | 0 | 0 | 0 | 0 | 0 |
| 2015 | 0 | 0 | 0 | 0 | 0 | 0 |
| 2016 | 0 | 0 | 0 | 0 | 0 | 0 |
| 2017 | 0 | 0 | 0 | 0 | 0 | 0 |
| 2018 | 0 | 0 | 0 | 0 | 0 | 0 |
| 2019 | 0 | 0 | 0 | 0 | 0 | 0 |
| 2020 | 0 | 0 | 0 | 0 | 0 | 0 |



| Toce                       |        |        |        |        |        |        |
|----------------------------|--------|--------|--------|--------|--------|--------|
| $\rho_s - 2500-3000$ m asl |        |        |        |        |        |        |
| Date                       | 01-feb | 01-mar | 01-apr | 15-apr | 01-mag | 01-giu |
| 1967                       | 0      | 0      | 0      | 0      | 0      | 0      |
| 1968                       | 0      | 0      | 0      | 0      | 0      | 0      |
| 1969                       | 0      | 0      | 0      | 0      | 0      | 0      |
| 1970                       | 0      | 0      | 0      | 0      | 0      | 0      |
| 1971                       | 0      | 0      | 0      | 0      | 0      | 0      |
| 1972                       | 0      | 0      | 0      | 0      | 0      | 0      |
| 1973                       | 0      | 0      | 0      | 0      | 0      | 0      |
| 1974                       | 0      | 0      | 0      | 0      | 0      | 0      |
| 1975                       | 0      | 0      | 0      | 0      | 0      | 0      |
| 1976                       | 0      | 0      | 0      | 0      | 0      | 0      |
| 1977                       | 0      | 0      | 0      | 0      | 0      | 0      |
| 1978                       | 0      | 0      | 0      | 0      | 0      | 0      |
| 1979                       | 0      | 0      | 0      | 0      | 0      | 0      |
| 1980                       | 0      | 0      | 0      | 0      | 0      | 0      |
| 1981                       | 0      | 0      | 0      | 0      | 0      | 0      |
| 1982                       | 0      | 0      | 0      | 0      | 0      | 0      |
| 1983                       | 0      | 0      | 0      | 0      | 0      | 0      |
| 1984                       | 0      | 0      | 0      | 0      | 0      | 0      |
| 1985                       | 0      | 0      | 0      | 0      | 0      | 0      |
| 1986                       | 0      | 0      | 0      | 0      | 0      | 0      |
| 1987                       | 0      | 0      | 0      | 0      | 0      | 0      |
| 1988                       | 0      | 0      | 0      | 0      | 0      | 0      |
| 1989                       | 0      | 0      | 0      | 0      | 0      | 0      |
| 1990                       | 0      | 0      | 0      | 0      | 0      | 0      |
| 1991                       | 0      | 0      | 0      | 0      | 0      | 0      |
| 1992                       | 0      | 0      | 0      | 0      | 0      | 0      |
| 1993                       | 0      | 0      | 0      | 0      | 0      | 0      |
| 1994                       | 0      | 0      | 0      | 0      | 0      | 0      |
| 1995                       | 0      | 0      | 0      | 0      | 0      | 0      |

|      |   |   |   |   |   |   |
|------|---|---|---|---|---|---|
| 1996 | 0 | 0 | 0 | 0 | 0 | 0 |
| 1997 | 0 | 0 | 0 | 0 | 0 | 0 |
| 1998 | 0 | 0 | 0 | 0 | 0 | 0 |
| 1999 | 0 | 0 | 0 | 0 | 0 | 0 |
| 2000 | 0 | 0 | 0 | 0 | 0 | 0 |
| 2001 | 0 | 0 | 0 | 0 | 0 | 0 |
| 2002 | 0 | 0 | 0 | 0 | 0 | 0 |
| 2003 | 0 | 0 | 0 | 0 | 0 | 0 |
| 2004 | 0 | 0 | 0 | 0 | 0 | 0 |
| 2005 | 0 | 0 | 0 | 0 | 0 | 0 |
| 2006 | 0 | 0 | 0 | 0 | 0 | 0 |
| 2007 | 0 | 0 | 0 | 0 | 0 | 0 |
| 2008 | 0 | 0 | 0 | 0 | 0 | 0 |
| 2009 | 0 | 0 | 0 | 0 | 0 | 0 |
| 2010 | 0 | 0 | 0 | 0 | 0 | 0 |
| 2011 | 0 | 0 | 0 | 0 | 0 | 0 |
| 2012 | 0 | 0 | 0 | 0 | 0 | 0 |
| 2013 | 0 | 0 | 0 | 0 | 0 | 0 |
| 2014 | 0 | 0 | 0 | 0 | 0 | 0 |
| 2015 | 0 | 0 | 0 | 0 | 0 | 0 |
| 2016 | 0 | 0 | 0 | 0 | 0 | 0 |
| 2017 | 0 | 0 | 0 | 0 | 0 | 0 |
| 2018 | 0 | 0 | 0 | 0 | 0 | 0 |
| 2019 | 0 | 0 | 0 | 0 | 0 | 0 |
| 2020 | 0 | 0 | 0 | 0 | 0 | 0 |
